# Supplementary material for: Dual metal and Lewis base catalysis approach for asymmetric synthesis of dihydroquinolines and the α-arylation of aldehydes via N-acyliminium ions
Source: Royal Society of Chemistry journal article supplement (doi:10.1039/c5cc05209b), 2015-01-01
Supplement: c5cc05209b1.pdf [file c5cc05209b1.pdf]

## SUPPORTING INFORMATION

Dual Metal and Lewis Base Catalysis Approach for Asymmetric Synthesis of Dihydroquinolines and the  $\alpha$ -Arylation of Aldehydes via N-Acyliminium Ions

Chandra M. R Volla, Eleonora Fava, Iuliana Atodiresei and Magnus Rueping\*

Corresponding Author: Prof. Dr. Magnus Rueping  
Institute of Organic Chemistry  
RWTH Aachen University  
Landoltweg 1  
D-52074 Aachen (Germany)  
Tel: +49.241.8094710  
Fax: +49.241.8092665  
E-mail: [magnus.rueping@rwth-aachen.de](mailto:magnus.rueping@rwth-aachen.de)

**Methods:** Unless otherwise stated, reactions were conducted in flame-dried glassware. Solvents after reactions and extraction were evaporated in a rotatory evaporator under vacuum. TLC for reaction monitoring was performed on 60 F<sub>254</sub> (Merck) with detection by UV light and charring with KMnO<sub>4</sub> or Pancaldi reagent. <sup>1</sup>H and <sup>13</sup>C NMR spectra were recorded by using Mercury 300, Varian Inova 400 and Varian Inova 600 spectrometers for 300, 400 and 600 MHz respectively and are reported relative to Me<sub>4</sub>Si (δ 0.0) or to the solvent residual <sup>1</sup>H-signal (CH-Cl<sub>3</sub>, δ(H) 7.27, CH<sub>2</sub>Cl<sub>2</sub> δ(H) 5.3). Data for <sup>1</sup>H NMR spectra are reported as follows: chemical shift (δ ppm), multiplicity, coupling constant (Hz) and integration. Data for <sup>13</sup>C NMR spectra are reported in terms of chemical shift. IR spectra were recorded on a Perkin-Elmer-100 spectrometer and are reported in frequency of absorption (cm<sup>-1</sup>). LC-MS mass spectra were measured on a LCQ FLEET instrument. The enantiomeric excesses were determined by HPLC analysis using a chiral stationary phase column (column, Daicel Co. CHIRALCEL OD-H, CHIRALPAK AD-H or CHIRALPAK AS-H; eluent: *n*hexane/ 2-propanol). The chiral HPLC methods were calibrated with the corresponding racemic mixtures. Optical rotations were measured on a Perkin Elmer 241 polarimeter.

**Typical Experimental Procedure:** In a screw-cap tube were placed 10 mol% of indium triflate, 20 mol% of imidazolidinone catalyst and 1.0 equiv. of the quinoline acetal. The tube was purged with argon and the septum was closed tightly. 1.0 mL of dry toluene was added to the tube and the mixture was stirred for 10 min at the temperature mentioned. Aldehyde (2.0 equiv.) was added slowly and the reaction continued to stir until complete disappearance of the quinoline acetal by TLC. Toluene was evaporated in a rotavap and 1.0 ml of methanol was added to the crude reaction mixture. NaBH<sub>4</sub> (2.0 equiv.) were added to the reaction at 0 °C. The reaction was allowed to reach room temperature and continued to stir for 2 h. Methanol was removed in a rotavap. Water was added to the reaction and the resulting mixture was extracted with ethyl acetate (3 times). The combined organic phase was dried over Na<sub>2</sub>SO<sub>4</sub>, the solvent was removed in a rotavap and the crude product was subjected to column chromatography over silica gel to get the pure product.

**Table 1. Optimization of reaction conditions for the addition of propanal to quinoline acetal**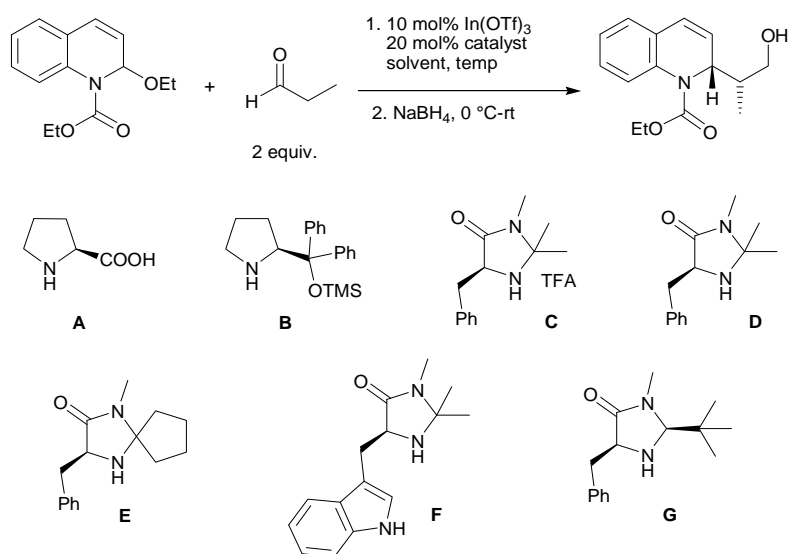

| Entry     | Catalyst             | Solvent           | Temp (°C) | Time (h)  | Yield <sup>a</sup> (%) | dr <sup>b</sup> | Ee <sup>c</sup> (%) |
|-----------|----------------------|-------------------|-----------|-----------|------------------------|-----------------|---------------------|
| 1         | <b>A</b>             | DCM               | RT        | 6         | 62                     | 50:50           | -11                 |
| 2         | <b>B</b>             | DCM               | RT        | 6         | 74                     | 50:50           | 38                  |
| 3         | <b>C</b>             | DCM               | RT        | 6         | 84                     | 51:49           | 19                  |
| 4         | -                    | DCM               | RT        | 3         | -                      | -               | -                   |
| 5         | <b>C<sup>d</sup></b> | DCM               | RT        | 24        | -                      | -               | -                   |
| 6         | <b>D</b>             | DCM               | RT        | 12        | 73                     | 52:48           | 63                  |
| 7         | <b>E</b>             | DCM               | RT        | 12        | 72                     | 51:49           | 57                  |
| 8         | <b>F</b>             | DCM               | RT        | 12        | 67                     | 50:50           | 54                  |
| 9         | <b>D</b>             | DCM               | 0         | 18        | 72                     | 65:35           | 87                  |
| 10        | <b>G</b>             | DCM               | 0         | 18        | 69                     | 50:50           | 91 <sup>e</sup>     |
| 11        | <b>D</b>             | CHCl <sub>3</sub> | 0         | 18        | 75                     | 67:33           | 92                  |
| <b>12</b> | <b>D</b>             | <b>Toluene</b>    | <b>0</b>  | <b>18</b> | <b>78</b>              | <b>76:24</b>    | <b>94</b>           |
| 13        | <b>D</b>             | Acetonitrile      | 0         | 18        | 62                     | 60:40           | 47                  |
| 14        | <b>D</b>             | THF               | 0         | 18        | 68                     | 70:30           | 92                  |
| 15        | <b>D</b>             | Ethanol           | 0         | 18        | 56                     | 67:33           | 89                  |

(a) Yield after column chromatography; (b) Diastereomeric ratio was determined by <sup>1</sup>H-NMR; (c) Enantiomeric excess of the major diastereomer was determined by chiral HPLC analysis; (d) Reaction was done in the absence of In(OTf)<sub>3</sub>; (e) Enantiomeric excess of minor diastereomer.

**Table 2. Optimization of protecting groups for the addition of propanal to quinoline acetal**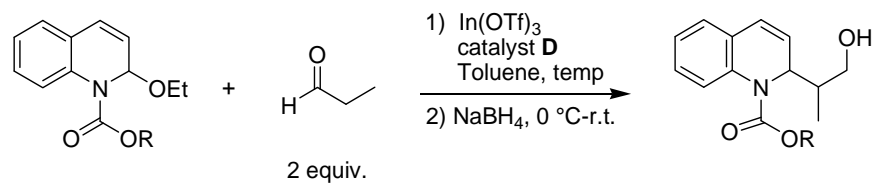

| Entry | R                  | In(OTf) <sub>3</sub><br>(mol%) | Catalyst <b>D</b><br>(mol%) | Temp<br>(°C) | dr <sup>a</sup> | Ee <sup>b</sup> (%) |
|-------|--------------------|--------------------------------|-----------------------------|--------------|-----------------|---------------------|
| 1     | <b>Et</b>          | 10                             | 20                          | 0            | 76:24           | 94                  |
| 2     | <b>Me</b>          | 10                             | 20                          | 0            | 65:35           | -                   |
| 3     | <b><i>i</i>-Pr</b> | 10                             | 20                          | 0            | 79:21           | -                   |
| 4     | <b><i>i</i>-Bu</b> | 10                             | 20                          | 0            | 80:20           | 93                  |
| 5     | <b><i>i</i>-Bu</b> | 10                             | 20                          | -10          | 80:20           | 96                  |
| 6     | <b><i>i</i>-Bu</b> | 10                             | 20                          | -20          | -               | -                   |
| 7     | <b><i>i</i>-Bu</b> | 5                              | 10                          | 0            | 76:24           | 95                  |
| 8     | <b><i>i</i>-Bu</b> | 10                             | 10                          | -10          | 80:20           | 97                  |
| 9     | <b><i>i</i>-Bu</b> | 20                             | 20                          | 0            | 81:19           | 94                  |
| 10    | <b><i>i</i>-Bu</b> | 30                             | 20                          | 0            | 79:21           | 94                  |
| 11    | <b><i>i</i>-Bu</b> | 20                             | 20                          | -10          | 81:19           | 95                  |
| 12    | <b><i>i</i>-Bu</b> | 30                             | 20                          | -10          | 79:21           | 92                  |

(a) Diastereomeric ratio was determined by <sup>1</sup>H-NMR; (b) Enantiomeric excess of the major diastereomer was determined by chiral HPLC analysis.

**Table 3. Scope of the reaction using different quinoline acetals and propanal**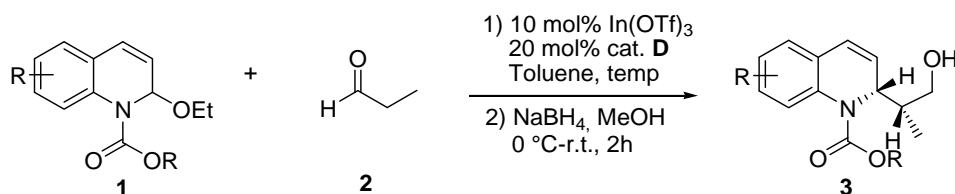

| Entry          | R            | R''          | Temp (°C) | Product   | Yield <sup>a</sup> (%) | dr <sup>b</sup> | Ee <sup>c</sup> (%) Major diast. | Ee <sup>c</sup> (%) Minor diast. |
|----------------|--------------|--------------|-----------|-----------|------------------------|-----------------|----------------------------------|----------------------------------|
| 1              | H            | Et           | 0         | <b>3a</b> | 78                     | 76:24           | 94                               | 86                               |
| 2              | H            | <i>i</i> -Bu | -10       | <b>3b</b> | 69                     | 80:20           | 96                               | 82                               |
| 3 <sup>d</sup> | H            | <i>i</i> -Bu | -10       | <b>3b</b> | 67                     | 80:20           | 97                               | 82                               |
| 4              | 4,7-dichloro | Et           | 0         | <b>3c</b> | 72                     | 65:35           | 97                               | 94                               |
| 5              | 3-bromo      | Et           | 0         | <b>3d</b> | 74                     | 80:20           | 97                               | 90                               |
| 6              | 3-methyl     | <i>i</i> -Bu | 0         | <b>3e</b> | 81                     | 79:21           | 94                               | 92                               |
| 7              | 6-methyl     | Et           | 0         | <b>3f</b> | 76                     | 65:35           | 96                               | 82                               |
| 8              | 6-methyl     | <i>i</i> -Bu | -10       | <b>3g</b> | 85                     | 77:23           | 97                               | 92                               |
| 9              | 5-nitro      | Et           | 0         | <b>3h</b> | 78                     | 70:30           | 90                               | 89                               |
| 10             | 6-chloro     | Et           | 0         | <b>3i</b> | 67                     | 80:20           | 95                               | 84                               |
| 11             | 6-bromo      | Et           | 0         | <b>3j</b> | 81                     | 75:25           | 91                               | 71                               |
| 12             | 6-methoxy    | Et           | 0         | <b>3k</b> | 83                     | 75:25           | 97                               | 87                               |

1.0 equiv. of quinolinium acetal and 2.0 equiv. of propionaldehyde in 1.0 mL of solvent for 18

h. (a) Yield after column chromatography; (b) Diastereomeric ratio was determined by <sup>1</sup>H-NMR.

(c) Enantiomeric excess of the major diastereomer was determined by chiral HPLC analysis;

(d) 10 mol% of In(OTf)<sub>3</sub> and 10 mol% of catalyst **D**.

**Table 4. Scope of the reaction using different aldehydes with quinoline acetal**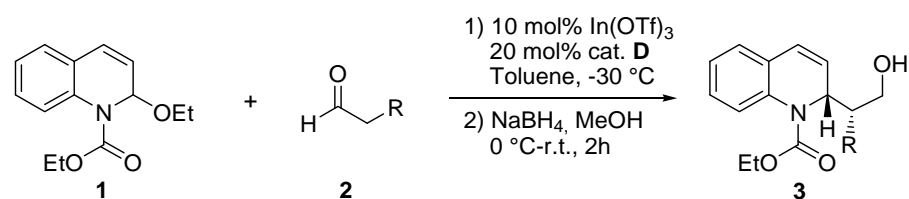

| Entry          | R             | Product   | Yield <sup>a</sup><br>(%) | dr <sup>b</sup> | Ee <sup>c</sup> (%)<br>Major diast. | Ee <sup>c</sup> (%)<br>Minor diast. |
|----------------|---------------|-----------|---------------------------|-----------------|-------------------------------------|-------------------------------------|
| 1 <sup>d</sup> | Me            | <b>3a</b> | 78                        | 76:24           | 94                                  | 86                                  |
| 2 <sup>d</sup> | Et            | <b>3l</b> | 73                        | 60:40           | 71                                  | -                                   |
| 2              | Et            | <b>3l</b> | 78                        | 65:35           | 89                                  | 66                                  |
| 3              | <i>n</i> -Pr  | <b>3m</b> | 79                        | 72:28           | 95                                  | 77                                  |
| 4 <sup>e</sup> | <i>n</i> -Pr  | <b>3n</b> | 71                        | 75:25           | 90                                  | 56                                  |
| 5              | <i>n</i> -Bu  | <b>3o</b> | 83                        | 75:25           | 94                                  | 68                                  |
| 6              | Bn            | <b>3p</b> | 63                        | 60:40           | 89                                  | 72                                  |
| 7              | <i>n</i> -Hex | <b>3q</b> | 72                        | 65:35           | 91                                  | 65                                  |
| 8 <sup>e</sup> | 2-propenyl    | <b>3r</b> | 81                        | 65:35           | 86                                  | 55                                  |

1.0 equiv. of quinolinium acetal and 3.0 equiv. of aldehyde in 1.0 mL of solvent for 72 h. (a) Yield after column chromatography; (b) Diastereomeric ratio was determined by <sup>1</sup>H-NMR. (c) Enantiomeric excess was determined by chiral HPLC analysis; (d) Reaction was done at 0 °C for 24 h; (e) The reaction was done using *i*-butyl derivative instead of ethyl.

**Ethyl-2-(1-hydroxypropan-2-yl)quinoline-1(2H)-carboxylate (3a)**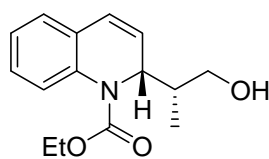

$^1\text{H NMR}$  (300 MHz,  $\text{CDCl}_3$ ):  $\delta$  = 1.03 (d,  $J$  = 6.9 Hz, 3H), 1.31 (t,  $J$  = 7.1 Hz, 3H), 1.45 - 1.74 (m, 1H), 3.32 (d,  $J$  = 11.4 Hz, 1H), 3.70 (dd,  $J$  = 11.6, 2.6 Hz, 1H), 4.14 - 4.42 (m, 2H), 4.81 (dd,  $J$  = 10.6, 6.0 Hz, 1H), 6.15 (dd,  $J$  = 9.6, 6.0 Hz, 1H), 6.52 (d,  $J$  = 9.6 Hz, 1H), 7.04 - 7.11 (m, 2H), 7.15 - 7.23 (m, 1H), 7.38 (d,  $J$  = 7.4 Hz, 1H);  $^{13}\text{C NMR}$  (75.0 MHz,  $\text{CDCl}_3$ ): 155.76, 133.87, 129.08, 127.43, 127.32, 126.25, 124.96, 124.52, 124.40, 63.76, 62.72, 53.75, 38.12, 14.38, 13.10; **MS (EI)**: ( $\text{C}_{15}\text{H}_{19}\text{NO}_3$ ), 261.2 (11,  $\text{M}^+$ ), 202.2 (99,  $\text{M}^+ - 59$ ), 158.2 (29,  $\text{M}^+ - (59 + 45)$ ), 130.1 (71,  $\text{M}^+ - (59 + 73)$ ); **IR (film)**: 3469, 2971, 2928, 1695, 1487, 1458, 1402, 1323, 1276, 1130, 1039, 983, 764  $\text{cm}^{-1}$ ;  $[\alpha]_{\text{D}}$  = +290.4 ( $c$  = 6.8,  $\text{CHCl}_3$ , 94% ee); **HPLC conditions**: AD-H column,  $n$ -hexane/2-propanol = 90/10, flow rate = 1.0 mL/min, major enantiomer:  $t_{\text{R}}$  = 7.83 min, minor enantiomer:  $t_{\text{R}}$  = 13.28 min.

**Isobutyl-2-(1-hydroxypropan-2-yl)quinoline-1(2H)-carboxylate (3b)**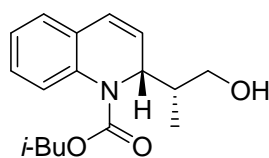

$^1\text{H NMR}$  (400 MHz,  $\text{CDCl}_3$ ):  $\delta$  = 0.91 (d,  $J$  = 3.2 Hz, 3H), 0.93 (d,  $J$  = 3.2 Hz, 3H), 1.02 (d,  $J$  = 6.9 Hz, 3H), 1.54 - 1.67 (m, 1H), 1.96 (pd,  $J$  = 13.4, 6.9 Hz, 1H), 3.31 (d,  $J$  = 10.5 Hz, 1H), 3.68 (d,  $J$  = 9.8 Hz, 1H), 3.93 (dd,  $J$  = 10.4, 6.3 Hz, 1H), 4.06 (dd,  $J$  = 10.4, 6.9 Hz, 1H), 4.81 (dd,  $J$  = 10.6, 6.0 Hz, 1H), 6.14 (dd,  $J$  = 9.6, 6.0 Hz, 1H), 6.51 (d,  $J$  = 9.6 Hz, 1H), 7.03 - 7.10 (m, 2H), 7.14 - 7.20 (m, 1H), 7.24 (bs, 1H);  $^{13}\text{C NMR}$  (100.6 MHz,  $\text{CDCl}_3$ ): 155.91, 133.82, 129.08, 127.40, 127.19, 126.21, 124.96, 124.52, 124.50, 72.91, 63.79, 53.81, 38.14, 27.83, 19.23, 19.11, 13.09; **MS (EI)**: ( $\text{C}_{17}\text{H}_{23}\text{NO}_3$ ), 289.3 (4,  $\text{M}^+$ ), 230.3 (57,  $\text{M}^+ - 59$ ), 130.2 (99,  $\text{M}^+ - (59 + 101)$ ); **IR (film)**: 3471, 2962, 2880, 1696, 1604, 1487, 1461, 1402, 1324, 1277, 1130, 1032, 981, 944, 764, 709, 577  $\text{cm}^{-1}$ ;  $[\alpha]_{\text{D}}$  = +326.1 ( $c$  = 4.0,  $\text{CHCl}_3$ , 97% ee); **HPLC conditions**: AD-H column,  $n$ -hexane/2-propanol = 90/10, flow rate = 1.0 mL/min, major enantiomer:  $t_{\text{R}}$  = 6.91 min, minor enantiomer:  $t_{\text{R}}$  = 10.78 min.

**Ethyl 4,7-dichloro-2-(1-hydroxypropan-2-yl)quinoline-1(2H)-carboxylate (3c)**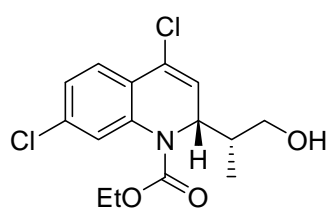

$^1\text{H NMR}$  (400 MHz,  $\text{CDCl}_3$ ):  $\delta$  = 1.01 (d,  $J$  = 6.9 Hz, 3H), 1.32 (t,  $J$  = 7.1 Hz, 3H), 1.59 - 1.71 (m, 1H), 3.34 (dd,  $J$  = 11.9, 2.5 Hz, 1H), 3.62 (dd,  $J$  = 11.9, 3.2 Hz, 1H), 4.21 - 4.39 (m, 2H), 4.89 (dd,  $J$  = 10.5, 6.7 Hz, 1H), 6.25 (d,  $J$  = 6.7 Hz, 1H), 7.13 (dd,  $J$  = 8.4, 2.0 Hz, 1H), 7.41 (bs, 1H), 7.50 (d,  $J$  = 8.4 Hz, 1H);  $^{13}\text{C NMR}$  (100.6 MHz,  $\text{CDCl}_3$ ): 159.03, 135.37, 134.28, 127.36, 126.11, 125.60, 124.75, 124.46, 124.22, 63.52, 63.30, 55.03, 38.23, 14.28, 12.95; **MS (EI)**: ( $\text{C}_{15}\text{H}_{17}\text{Cl}_2\text{NO}_3$ ), 329.1 (5,  $\text{M}^+$ ), 272.0 (66, ( $\text{M}^+ + 2$ ) - 59), 270.0 (99, ( $\text{M}^+ - 59$ )); **IR (film)**: 3468, 2922, 1895, 1703, 1595, 1475, 1410, 1305, 1142, 1097, 1037, 997, 938, 828, 763, 692  $\text{cm}^{-1}$ ;  $[\alpha]_{\text{D}}$  = +236.1 ( $c$  = 4.4,  $\text{CHCl}_3$ , 97% ee); **HPLC conditions**: AD-H column,  $n$ -hexane/2-propanol = 90/10, flow rate = 1.0 mL/min, major enantiomer:  $t_{\text{R}}$  = 7.78 min, minor enantiomer:  $t_{\text{R}}$  = 18.96 min.

**Ethyl 3-bromo-2-(1-hydroxypropan-2-yl)quinoline-1(2H)-carboxylate (3d)**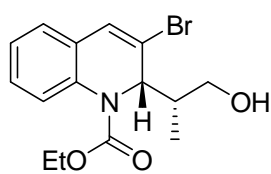

**<sup>1</sup>H NMR (400 MHz, CDCl<sub>3</sub>):**  $\delta$  = 1.19 (d,  $J$  = 7.0 Hz, 3H), 1.31 (t,  $J$  = 7.1 Hz, 3H), 1.70 - 1.83 (m, 1H), 3.33 (t,  $J$  = 9.5 Hz, 1H), 3.56 (d,  $J$  = 11.4 Hz, 1H), 4.18 - 4.39 (m, 2H), 5.07 (d,  $J$  = 9.7 Hz, 1H), 6.89 (s, 1H), 7.05 - 7.12 (m, 2H), 7.19 - 7.24 (m, 1H), 7.40 (bs, 1H); **<sup>13</sup>C NMR (100.6 MHz, CDCl<sub>3</sub>):** 154.72, 132.96, 127.83, 127.69, 127.35, 125.79, 124.85, 124.39, 119.37, 64.07, 62.98, 60.28, 37.75, 14.35; **MS (EI):** (C<sub>15</sub>H<sub>18</sub>BrNO<sub>3</sub>), 341.1 (13, M<sup>+</sup> + 2), 339.0 (13, M<sup>+</sup>), 282.1 (99, (M<sup>+</sup> + 2) - 59), 279.1 (99, M<sup>+</sup> - 59); **IR (film):** 3468, 2924, 1701, 1570, 1481, 1390, 1252, 1137, 1102, 1036, 939, 882, 823, 762, 697 cm<sup>-1</sup>; [ $\alpha$ ]<sub>D</sub> = +173.8 (c = 4.4, CHCl<sub>3</sub>, 97% ee); **HPLC conditions:** AD-H column, *n*-hexane/2-propanol = 90/10, flow rate = 1.0 mL/min, major enantiomer: t<sub>R</sub> = 9.03 min, minor enantiomer: t<sub>R</sub> = 11.45 min.

**Isobutyl 2-(1-hydroxypropan-2-yl)-3-methylquinoline-1(2H)-carboxylate (3e)**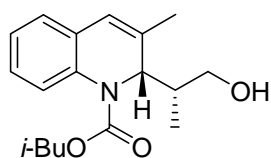

**<sup>1</sup>H NMR (600 MHz, CDCl<sub>3</sub>):**  $\delta$  = 0.94 (t,  $J$  = 5.9 Hz, 6H), 1.06 (d,  $J$  = 7.0 Hz, 3H), 1.67 (bs, 1H), 1.92 - 2.01 (m, 1H), 2.04 (s, 3H), 2.84 (bs, 1H, OH), 3.30 (bs, 1H), 3.61 (d,  $J$  = 7.8 Hz, 1H), 3.94 (dd,  $J$  = 9.6, 6.6 Hz, 1H), 4.08 (dd,  $J$  = 9.9, 7.3 Hz, 1H), 4.69 (d,  $J$  = 9.9 Hz, 1H), 6.31 (d,  $J$  = 1.2 Hz, 1H), 7.05 - 7.07 (m, 2H), 7.11 - 7.17 (m, 1H), 7.36 (bs, 1H); **<sup>13</sup>C NMR (150.9 MHz, CDCl<sub>3</sub>):** 156.42, 138.06, 133.00, 128.22, 126.37, 125.60, 124.45, 123.94, 121.46, 72.82, 64.41, 57.55, 37.27, 27.85, 19.25, 19.13, 14.44; **MS (EI):** (C<sub>18</sub>H<sub>25</sub>NO<sub>3</sub>), 303.4 (4, M<sup>+</sup>), 244.3 (71, M<sup>+</sup> - 59), 144.2 (99, M<sup>+</sup> - (59 + 101)); **IR (film):** 3471, 2963, 1680, 1597, 1576, 1487, 1404, 1322, 1263, 1140, 1075, 1043, 983, 762, 589 cm<sup>-1</sup>; [ $\alpha$ ]<sub>D</sub> = +196.4 (c = 4.0, CHCl<sub>3</sub>, 94% ee); **HPLC conditions:** AD-H column, *n*-hexane/2-propanol = 90/10, flow rate = 1.0 mL/min, major enantiomer: t<sub>R</sub> = 6.42 min, minor enantiomer: t<sub>R</sub> = 9.48 min.

**Ethyl 2-(1-hydroxypropan-2-yl)-6-methylquinoline-1(2H)-carboxylate (3f)**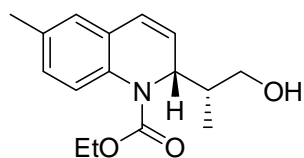

**<sup>1</sup>H NMR (400 MHz, CDCl<sub>3</sub>):**  $\delta$  = 1.02 (d,  $J$  = 6.9 Hz, 3H), 1.30 (t,  $J$  = 7.1 Hz, 3H), 1.52 - 1.68 (m, 2H), 2.29 (s, 3H), 3.05 - 3.22 (m, 1H), 3.29 (t,  $J$  = 10.1 Hz, 1H), 3.68 (d,  $J$  = 11.1 Hz, 1H), 4.13 - 4.27 (m, 1H), 4.27 - 4.38 (m, 1H), 4.77 (dd,  $J$  = 10.6, 6.0 Hz, 1H), 6.12 (dd,  $J$  = 9.6, 6.0 Hz, 1H), 6.46 (d,  $J$  = 9.6 Hz, 1H), 6.90 (d,  $J$  = 1.6 Hz, 1H), 6.99 (dd,  $J$  = 8.3, 1.6 Hz, 1H), 7.23 (bs, 1H); **<sup>13</sup>C NMR (100.6 MHz, CDCl<sub>3</sub>):** 155.83, 134.12, 131.22, 129.04, 128.00, 127.21, 126.71, 124.97, 124.16, 63.78, 62.63, 53.76, 38.01, 20.76, 14.38, 13.12; **MS (EI):** (C<sub>16</sub>H<sub>21</sub>NO<sub>3</sub>), 275.2 (6, M<sup>+</sup>), 216.2 (84, M<sup>+</sup> - 59), 144.2 (99, M<sup>+</sup> - (59 + 73)); **IR (film):** 3468, 2923, 1693, 1493, 1460, 1396, 1320, 1125, 1038, 984, 820, 766, 710 cm<sup>-1</sup>; [ $\alpha$ ]<sub>D</sub> = +294.7 (c = 3.6, CHCl<sub>3</sub>, 96% ee); **HPLC conditions:** AD-H column, *n*-hexane/2-propanol = 90/10, flow rate = 1.0 mL/min, major enantiomer: t<sub>R</sub> = 7.64 min, minor enantiomer: t<sub>R</sub> = 14.67 min.



**Isobutyl 2-(1-hydroxypropan-2-yl)-6-methylquinoline-1(2H)-carboxylate (3g)**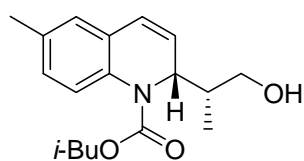

**<sup>1</sup>H NMR (600 MHz, CDCl<sub>3</sub>):**  $\delta$  = 0.94 (t,  $J$  = 6.1 Hz, 6H), 1.02 (d,  $J$  = 6.8 Hz, 3H), 1.61 (bs, 1H), 1.90 - 2.01 (m, 1H), 2.30 (s, 3H), 3.19 (bs, 1H, OH), 3.31 (s, 1H), 3.68 (d,  $J$  = 10.4 Hz, 1H), 3.93 (dd,  $J$  = 10.1, 6.5 Hz, 1H), 4.07 (dd,  $J$  = 10.0, 7.2 Hz, 1H), 4.80 (dd,  $J$  = 10.6, 6.0 Hz, 1H), 6.13 (dd,  $J$  = 9.2, 6.1 Hz, 1H), 6.47 (d,  $J$  = 9.6 Hz, 1H), 6.90 (s, 1H), 7.00 (d,  $J$  = 8.2 Hz, 1H), 7.25 (bs, 1H); **<sup>13</sup>C NMR (150.9 MHz, CDCl<sub>3</sub>):** 156.08, 134.10, 131.23, 129.09, 127.90, 127.20, 126.70, 125.02, 124.28, 72.84, 63.81, 53.86, 38.07, 27.86, 20.76, 19.25, 19.13, 13.12; **MS (EI):** (C<sub>18</sub>H<sub>25</sub>NO<sub>3</sub>), 303.2 (21, M<sup>+</sup>), 244.2 (22, M<sup>+</sup> - 59), 144.1 (99, M<sup>+</sup> - (59 + 101)); **IR (film):** 3475, 2962, 2880, 1679, 1495, 1464, 1400, 1322, 1279, 1234, 1126, 1033, 981, 891, 819, 766, 710 cm<sup>-1</sup>;  $[\alpha]_D = +227.8$  (c = 2.6, CHCl<sub>3</sub>, 97% ee); **HPLC conditions:** AD-H column, *n*-hexane/2-propanol = 90/10, flow rate = 1.0 mL/min, major enantiomer:  $t_R = 6.79$  min, minor enantiomer:  $t_R = 11.73$  min.

**Ethyl 2-(1-hydroxypropan-2-yl)-5-nitroquinoline-1(2H)-carboxylate (3h)**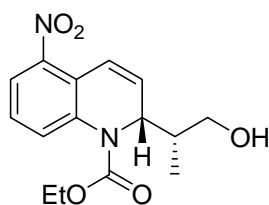

**<sup>1</sup>H NMR (400 MHz, CDCl<sub>3</sub>):**  $\delta$  = 1.03 (d,  $J$  = 6.9 Hz, 3H), 1.30 (t,  $J$  = 7.1 Hz, 3H), 1.59 - 1.69 (m, 1H), 3.31 - 3.40 (m, 1H), 3.63 (td,  $J$  = 11.8, 3.7 Hz, 1H), 4.20 - 4.39 (m, 2H), 4.87 (dd,  $J$  = 10.6, 6.4 Hz, 1H), 6.40 (dd,  $J$  = 10.0, 6.3 Hz, 1H), 7.08 (d,  $J$  = 10.1 Hz, 1H), 7.30 (t,  $J$  = 8.2 Hz, 1H), 7.65 (d,  $J$  = 7.0 Hz, 1H), 7.70 (dd,  $J$  = 8.2, 1.1 Hz, 1H); **<sup>13</sup>C NMR (100.6 MHz, CDCl<sub>3</sub>):** 155.05, 146.18, 135.79, 133.35, 129.50, 126.76, 121.90, 120.55, 119.87, 63.78, 63.24, 53.22, 38.16, 14.29, 12.91; **MS (EI):** (C<sub>15</sub>H<sub>18</sub>N<sub>2</sub>O<sub>5</sub>), 306.1 (6, M<sup>+</sup>), 247.1 (99, M<sup>+</sup> - 59), 175.1 (65, M<sup>+</sup> - (59 + 73)); **IR (film):** 3443, 2969, 2923, 1704, 1528, 1468, 1385, 1291, 1217, 1136, 1063, 987, 913, 764, 706 cm<sup>-1</sup>;  $[\alpha]_D = +331.2$  (c = 4.6, CHCl<sub>3</sub>, 90% ee); **HPLC conditions:** AD-H column, *n*-hexane/2-propanol = 90/10, flow rate = 1.0 mL/min, major enantiomer:  $t_R = 14.51$  min, minor enantiomer:  $t_R = 20.44$  min.

**Ethyl 6-chloro-2-(1-hydroxypropan-2-yl)quinoline-1(2H)-carboxylate (3i)**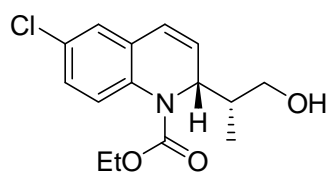

**<sup>1</sup>H NMR (600 MHz, CDCl<sub>3</sub>):**  $\delta$  = 1.01 (d,  $J$  = 6.8 Hz, 3H), 1.30 (t,  $J$  = 7.1 Hz, 3H), 1.60 (s, 1H), 3.32 (d,  $J$  = 11.1 Hz, 1H), 3.64 (d,  $J$  = 11.0 Hz, 1H), 4.17 - 4.27 (m, 1H), 4.27 - 4.36 (m, 1H), 4.82 (dd,  $J$  = 10.4, 6.0 Hz, 1H), 6.15 - 6.23 (m, 1H), 6.45 (d,  $J$  = 9.6 Hz, 1H), 7.07 (s, 1H), 7.13 (d,  $J$  = 8.5 Hz, 1H), 7.30 (bs, 1H); **<sup>13</sup>C NMR (150.9 MHz, CDCl<sub>3</sub>):** 155.46, 132.42, 130.48, 129.64, 128.83, 127.15, 125.87, 125.65, 124.09, 63.70, 62.88, 53.82, 38.27, 14.33, 12.96; **MS (EI):** (C<sub>15</sub>H<sub>18</sub>ClNO<sub>3</sub>), 295.1 (10, M<sup>+</sup>), 236.2 (95, M<sup>+</sup> - 59), 164.1 (99, M<sup>+</sup> - (59 + 73)); **IR (film):** 3466, 2926, 1699, 1481, 1396, 1282, 1242, 1135, 1092, 1038, 985, 880, 822, 764, 712, 660 cm<sup>-1</sup>;  $[\alpha]_D = +248.5$  (c = 7.3, CHCl<sub>3</sub>, 95% ee); **HPLC conditions:** AD-H column, *n*-hexane/2-propanol = 90/10, flow rate = 1.0 mL/min, major enantiomer:  $t_R = 8.91$  min, minor enantiomer:  $t_R = 13.02$  min.

**Ethyl 6-bromo-2-(1-hydroxypropan-2-yl)quinoline-1(2H)-carboxylate (3j)**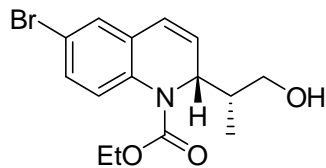

**<sup>1</sup>H NMR (400 MHz, CDCl<sub>3</sub>):**  $\delta$  = 0.99 (d,  $J$  = 6.9 Hz, 3H), 1.29 (t,  $J$  = 7.1 Hz, 3H), 1.59 (s, 1H), 3.32 (s, 1H), 3.62 (d,  $J$  = 10.1 Hz, 1H), 4.15 - 4.38 (m, 2H), 4.81 (dd,  $J$  = 10.5, 6.0 Hz, 1H), 6.17 (dd,  $J$  = 9.6, 6.0 Hz, 1H), 6.43 (d,  $J$  = 9.7 Hz, 1H), 7.18 - 7.33 (m, 3H); **<sup>13</sup>C NMR (100.6 MHz, CDCl<sub>3</sub>):** 155.39, 132.95, 130.45, 130.07, 129.23, 128.82, 126.00, 123.99, 117.33, 63.68, 62.90, 53.79, 38.32, 14.33, 12.96; **MS (EI):** (C<sub>15</sub>H<sub>18</sub>BrNO<sub>3</sub>), 341.1 (10, M<sup>+</sup> + 2), 339.0 (10, M<sup>+</sup>), 282.1 (99, (M<sup>+</sup> + 2) - 59), 279.1 (99, M<sup>+</sup> - 59); **IR (film):** 3469, 2972, 2928, 2881, 1695, 1479, 1391, 1315, 1134, 1080, 1038, 984, 879, 818, 762, 710 cm<sup>-1</sup>;  $[\alpha]_D = +204.8$  (c = 6.5, CHCl<sub>3</sub>, 91% ee); **HPLC conditions:** AD-H column, *n*-hexane/2-propanol = 90/10, flow rate = 1.0 mL/min, major enantiomer:  $t_R$  = 9.31 min, minor enantiomer:  $t_R$  = 14.03 min.

**Ethyl 2-(1-hydroxypropan-2-yl)-6-methoxyquinoline-1(2H)-carboxylate (3k)**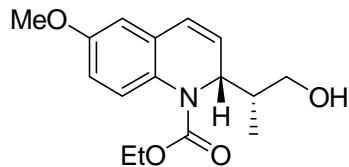

**<sup>1</sup>H NMR (400 MHz, CDCl<sub>3</sub>):**  $\delta$  = 1.02 (d,  $J$  = 6.9 Hz, 3H), 1.29 (t,  $J$  = 7.1 Hz, 3H), 1.52 - 1.64 (m, 1H + OH), 3.30 (s, 1H), 3.68 (d,  $J$  = 12.0 Hz, 1H), 3.78 (s, 3H), 4.12 - 4.25 (m, 1H), 4.26 - 4.38 (m, 1H), 4.78 (dd,  $J$  = 10.7, 6.0 Hz, 1H), 6.16 (dd,  $J$  = 9.5, 6.1 Hz, 1H), 6.46 (d,  $J$  = 9.7 Hz, 1H), 6.62 (d,  $J$  = 2.9 Hz, 1H), 6.74 (dd,  $J$  = 8.9, 2.9 Hz, 1H), 7.26 (bs, 1H); **<sup>13</sup>C NMR (100.6 MHz, CDCl<sub>3</sub>):** 156.37, 155.80, 129.87, 128.38, 125.44, 124.96, 114.96, 113.03, 110.83, 63.82, 62.59, 55.42, 53.79, 37.91, 14.40, 13.12; **MS (EI):** (C<sub>16</sub>H<sub>21</sub>NO<sub>4</sub>), 291.1 (16, M<sup>+</sup>), 232.1 (99, M<sup>+</sup> - 59), 160.0 (63, M<sup>+</sup> - (59 + 73)); **IR (film):** 3461, 2965, 2933, 1670, 1609, 1495, 1399, 1377, 1301, 1264, 1233, 1162, 1123, 1031, 763, 710 cm<sup>-1</sup>;  $[\alpha]_D = +283.7$  (c = 7.3, CHCl<sub>3</sub>, 97% ee); **HPLC conditions:** AD-H column, *n*-hexane/2-propanol = 90/10, flow rate = 1.0 mL/min, major enantiomer:  $t_R$  = 10.97 min, minor enantiomer:  $t_R$  = 22.95 min.

**Ethyl 2-(1-hydroxybutan-2-yl)quinoline-1(2H)-carboxylate (3l)**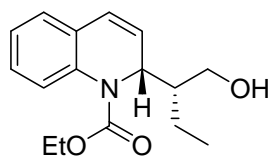

**<sup>1</sup>H NMR (400 MHz, CDCl<sub>3</sub>):**  $\delta$  = 0.88 (t,  $J$  = 7.8 Hz, 3H), 1.30 (dt,  $J$  = 7.1, 0.8 Hz, 3H), 1.34 - 1.37 (m, 1H), 1.38 - 1.50 (m, 1H), 1.52 - 1.68 (m, 1H), 3.50 (t,  $J$  = 10.8 Hz, 1H), 3.61 (d,  $J$  = 12.0 Hz, 1H), 4.16 - 4.27 (m, 1H), 4.28 - 4.39 (m, 1H), 4.84 (dd,  $J$  = 10.8, 6.1 Hz, 1H), 6.18 (dd,  $J$  = 9.6, 6.1 Hz, 1H), 6.51 (d,  $J$  = 9.6 Hz, 1H), 7.02 - 7.12 (m, 2H), 7.15 - 7.21 (m, 1H), 7.35 (d,  $J$  = 4.0 Hz, 1H); **<sup>13</sup>C NMR (100.6 MHz, CDCl<sub>3</sub>):** 155.86, 133.76, 129.26, 127.48, 127.29, 126.24, 124.89, 124.55, 124.45, 62.76, 59.05, 52.92, 44.85, 18.91, 14.35, 11.71; **MS (EI):** (C<sub>16</sub>H<sub>21</sub>NO<sub>3</sub>), 275.2 (5, M<sup>+</sup>), 202.2 (99, M<sup>+</sup> - 73), 158.2 (32, M<sup>+</sup> - (73 + 45)), 130.2 (93, M<sup>+</sup> - (73 + 73)); **IR (film):** 3466, 3018, 2925, 1671, 1407, 1328, 1215, 1036, 758, 669 cm<sup>-1</sup>;  $[\alpha]_D = +350.0$  (c = 3.0, CHCl<sub>3</sub>, 89% ee); **HPLC conditions:** AD-H column, *n*-hexane/2-propanol = 90/10, flow rate = 1.0 mL/min, major enantiomer:  $t_R$  = 7.41 min, minor enantiomer:  $t_R$  = 18.76 min.

**Ethyl 2-(1-hydroxypentan-2-yl)quinoline-1(2H)-carboxylate (3m)**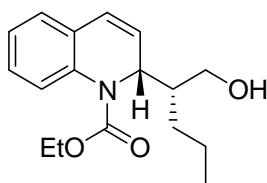

**<sup>1</sup>H NMR (600 MHz, CDCl<sub>3</sub>):**  $\delta$  = 0.84 (t,  $J$  = 7.3 Hz, 3H), 1.07 - 1.20 (m, 1H), 1.30 (t,  $J$  = 7.1 Hz, 3H), 1.23 - 1.28 (m, 1H), 1.35 - 1.51 (m, 2H), 1.53 - 1.66 (m, 1H), 3.45 (t,  $J$  = 10.5 Hz, 1H), 3.60 (d,  $J$  = 12.0 Hz, 1H), 4.15 - 4.27 (m, 1H), 4.28 - 4.39 (m, 1H), 4.83 (dd,  $J$  = 10.8, 6.1 Hz, 1H), 6.18 (dd,  $J$  = 9.6, 6.0 Hz, 1H), 6.51 (d,  $J$  = 9.6 Hz, 1H), 7.05 - 7.12 (m, 2H), 7.15 - 7.21 (m, 1H), 7.35 (d,  $J$  = 3.9 Hz, 1H); **<sup>13</sup>C NMR (150.9 MHz, CDCl<sub>3</sub>):** 155.90, 133.74, 129.26, 127.48, 127.28, 126.25, 124.87, 124.55, 124.44, 62.76, 59.58, 52.98, 43.10, 28.32, 20.42, 14.35, 14.30; **MS (EI):** (C<sub>17</sub>H<sub>23</sub>NO<sub>3</sub>), 289.3 (7, M<sup>+</sup>), 202.2 (99, M<sup>+</sup> - 87), 158.2 (29, M<sup>+</sup> - (87 + 45)), 130.2 (76, M<sup>+</sup> - (87 + 73)); **IR (film):** 3475, 2958, 2929, 2872, 1675, 1603, 1572, 1489, 1460, 1404, 1325, 1277, 1208, 1131, 1047, 919, 765, 710 cm<sup>-1</sup>; [ $\alpha$ ]<sub>D</sub> = +250.6 (c = 1.8, CHCl<sub>3</sub>, 95% ee); **HPLC conditions:** AD-H column, *n*-hexane/2-propanol = 90/10, flow rate = 1.0 mL/min, major enantiomer:  $t_R$  = 7.11 min, minor enantiomer:  $t_R$  = 21.86 min.

**Isobutyl 2-(1-hydroxypentan-2-yl)quinoline-1(2H)-carboxylate (3n)**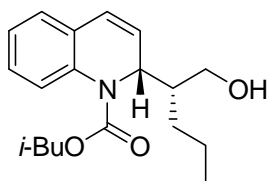

**<sup>1</sup>H NMR (400 MHz, CDCl<sub>3</sub>):**  $\delta$  = 0.85 (t,  $J$  = 7.3 Hz, 3H), 0.90 - 0.98 (m, 6H), 1.10 - 1.20 (m, 1H), 1.27 - 1.34 (m, 1H), 1.37 - 1.52 (m, 2H), 1.55 - 1.71 (m, 1H), 1.97 (pd,  $J$  = 13.3, 6.7 Hz, 1H), 3.21 (bs, 1H, OH), 3.47 (d,  $J$  = 11.7 Hz, 1H), 3.62 (d,  $J$  = 11.9 Hz, 1H), 3.95 (dd,  $J$  = 10.3, 6.4 Hz, 1H), 4.08 (dd,  $J$  = 10.4, 7.0 Hz, 1H), 4.86 (dd,  $J$  = 10.8, 6.0 Hz, 1H), 6.20 (dd,  $J$  = 9.6, 6.0 Hz, 1H), 6.53 (d,  $J$  = 9.6 Hz, 1H), 7.07 - 7.13 (m, 2H), 7.17 - 7.21 (m, 1H), 7.36 (bs, 1H); **<sup>13</sup>C NMR (100.6 MHz, CDCl<sub>3</sub>):** 156.10, 133.71, 129.28, 127.48, 127.18, 126.24, 124.89, 124.59, 124.57, 72.98, 59.64, 53.07, 43.12, 28.37, 27.83, 20.42, 19.22, 19.10, 14.29; **MS (EI):** (C<sub>19</sub>H<sub>27</sub>NO<sub>3</sub>), 317.1 (3, M<sup>+</sup>), 230.0 (96, M<sup>+</sup> - 87), 130.0 (99, M<sup>+</sup> - (87 + 101)); **IR (film):** 3455, 2958, 2929, 2874, 1679, 1488, 1462, 1402, 1319, 1274, 1245, 1127, 1028, 763, 711, 666 cm<sup>-1</sup>; [ $\alpha$ ]<sub>D</sub> = +242.4 (c = 3.7, CHCl<sub>3</sub>, 90% ee); **HPLC conditions:** AD-H column, *n*-hexane/2-propanol = 90/10, flow rate = 1.0 mL/min, major enantiomer:  $t_R$  = 6.82 min, minor enantiomer:  $t_R$  = 14.60 min.

**Ethyl 2-(1-hydroxyhexan-2-yl)quinoline-1(2H)-carboxylate (3o)**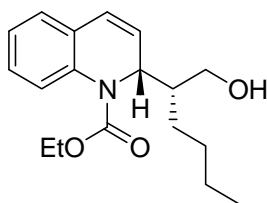

**<sup>1</sup>H NMR (600 MHz, CDCl<sub>3</sub>):**  $\delta$  = 0.85 (t,  $J$  = 7.3 Hz, 3H), 1.05 - 1.17 (m, 1H), 1.21 - 1.29 (m, 2H), 1.32 (t,  $J$  = 7.1 Hz, 3H), 1.29 - 1.35 (m, 1H), 1.35 - 1.45 (m, 2H), 1.57 - 1.67 (m, 1H), 3.28 (bs, 1H, OH), 3.47 (t,  $J$  = 10.9 Hz, 1H), 3.62 (d,  $J$  = 12.1 Hz, 1H), 4.18 - 4.29 (m, 1H), 4.30 - 4.38 (m, 1H), 4.84 (dd,  $J$  = 10.8, 6.0 Hz, 1H), 6.20 (dd,  $J$  = 9.4, 6.1 Hz, 1H), 6.53 (d,  $J$  = 9.6 Hz, 1H), 7.07 - 7.14 (m, 2H), 7.20 (t,  $J$  = 7.5 Hz, 1H), 7.34 (bs, 1H); **<sup>13</sup>C NMR (150.9 MHz, CDCl<sub>3</sub>):** 156.02, 133.68, 129.33, 127.48, 127.30, 126.28, 124.87, 124.58, 124.45, 62.81, 59.55, 53.00, 43.24, 29.49, 25.79, 22.96, 14.38, 14.01; **MS (EI):** (C<sub>18</sub>H<sub>25</sub>NO<sub>3</sub>), 303.2 (6, M<sup>+</sup>), 202.2 (99, M<sup>+</sup> - 101), 158.2

(26,  $M^+$  - (101 + 45)), 130.2 (68,  $M^+$  - (101 + 73)); **IR (film)**: 3476, 2929, 2868, 1680, 1484, 1401, 1322, 1128, 1039, 901, 764  $\text{cm}^{-1}$ ;  $[\alpha]_D = +178.7$  ( $c = 1.6$ ,  $\text{CHCl}_3$ , 94% ee); **HPLC conditions**: AD-H column, *n*-hexane/2-propanol = 90/10, flow rate = 1.0 mL/min, major enantiomer:  $t_R = 6.87$  min, minor enantiomer:  $t_R = 18.47$  min.

### Ethyl 2-(1-hydroxy-3-phenylpropan-2-yl)quinoline-1(2*H*)-carboxylate (3p)

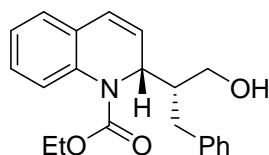

**$^1\text{H NMR}$  (400 MHz,  $\text{CDCl}_3$ )**:  $\delta = 1.30$  (t,  $J = 7.1$  Hz, 3H), 1.60 (bs, 1H, OH), 1.67 (t,  $J = 10.9$  Hz, 1H), 2.71 - 2.88 (m, 2H), 3.12 - 3.23 (m, 1H), 3.50 (d,  $J = 11.3$  Hz, 1H), 4.24 (qd,  $J = 10.7, 7.1$  Hz, 1H), 4.35 (qd,  $J = 10.8, 7.1$  Hz, 1H), 4.96 (dd,  $J = 10.8, 6.1$  Hz, 1H), 6.28 (dd,  $J = 9.6, 6.0$  Hz, 1H), 6.60 (d,  $J = 9.6$  Hz, 1H), 7.05 - 7.23 (m, 8H), 7.33 (d,  $J = 8.5$  Hz, 1H);  **$^{13}\text{C NMR}$  (100.6 MHz,  $\text{CDCl}_3$ )**: 155.81, 140.13, 133.70, 129.29, 128.75, 128.22, 127.44, 127.31, 126.39, 125.89, 125.27, 124.64, 124.40, 62.88, 58.57, 52.76, 45.91, 32.31, 14.34; **MS (EI)**: ( $\text{C}_{21}\text{H}_{23}\text{NO}_3$ ), 337.0 (2,  $M^+$ ), 202.2 (99,  $M^+$  - 135), 158.0 (23,  $M^+$  - (135 + 45)), 130.0 (75,  $M^+$  - (135 + 73)); **IR (film)**: 3467, 2930, 1660, 1491, 1403, 1325, 1266, 1210, 1171, 1124, 1028, 943, 896, 833, 765, 698, 659  $\text{cm}^{-1}$ ;  $[\alpha]_D = +123.1$  ( $c = 1.6$ ,  $\text{CHCl}_3$ , 89% ee); **HPLC conditions**: AD-H column, *n*-hexane/2-propanol = 90/10, flow rate = 1.0 mL/min, major enantiomer:  $t_R = 13.29$  min, minor enantiomer:  $t_R = 37.78$  min.

### Ethyl 2-(1-hydroxyoctan-2-yl)quinoline-1(2*H*)-carboxylate (3q)

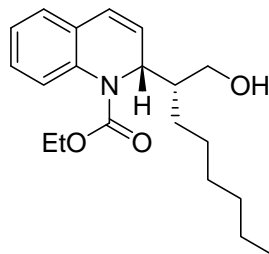

**$^1\text{H NMR}$  (400 MHz,  $\text{CDCl}_3$ )**:  $\delta = 0.83$  (t,  $J = 6.8$  Hz, 3H), 1.05 - 1.16 (m, 1H), 1.18 - 1.26 (m, 6H), 1.30 (t,  $J = 7.1$  Hz, 3H), 1.34 - 1.45 (m, 2H), 1.55 - 1.67 (m, 2H), 3.45 (t,  $J = 10.5$  Hz, 1H), 3.60 (d,  $J = 11.9$  Hz, 1H), 4.16 - 4.27 (m, 1H), 4.28 - 4.39 (m, 1H), 4.82 (dd,  $J = 10.7, 6.0$  Hz, 1H), 6.18 (dd,  $J = 9.6, 6.0$  Hz, 1H), 6.51 (d,  $J = 9.6$  Hz, 1H), 7.04 - 7.12 (m, 2H), 7.15 - 7.21 (m, 1H), 7.34 (d,  $J = 4.9$  Hz, 1H);  **$^{13}\text{C NMR}$  (100.6 MHz,  $\text{CDCl}_3$ )**: 158.66, 133.75, 129.29, 127.48, 127.28, 126.25, 124.86, 124.54, 124.44, 62.76, 59.60, 53.00, 43.30, 31.75, 29.54, 27.27, 26.11, 22.57, 14.35, 14.03; **MS (EI)**: ( $\text{C}_{20}\text{H}_{29}\text{NO}_3$ ), 331.3 (4,  $M^+$ ), 202.2 (99,  $M^+$  - 129), 158.2 (21,  $M^+$  - (129 + 45)), 130.2 (64,  $M^+$  - (129 + 73)); **IR (film)**: 3461, 2928, 2860, 1771, 1711, 1609, 1491, 1460, 1396, 1277, 1213, 1107, 1073, 1044, 951, 757, 724, 528  $\text{cm}^{-1}$ ;  $[\alpha]_D = +299.3$  ( $c = 4.2$ ,  $\text{CHCl}_3$ , 91% ee); **HPLC conditions**: AD-H column, *n*-hexane/2-propanol = 90/10, flow rate = 1.0 mL/min, major enantiomer:  $t_R = 6.57$  min, minor enantiomer:  $t_R = 19.42$  min.

### Isobutyl 2-(1-hydroxypent-4-en-2-yl)quinoline-1(2*H*)-carboxylate (3r)

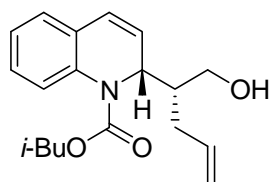

**$^1\text{H NMR}$  (600 MHz,  $\text{CDCl}_3$ )**:  $\delta = 0.93$  (t,  $J = 5.9$  Hz, 6H), 1.53 (s, 1H), 1.91 - 2.00 (m, 1H), 2.19 (d,  $J = 13.9$  Hz, 1H), 2.32 (dd,  $J = 21.2, 10.4$  Hz, 1H), 3.16 (bs, 1H, OH), 3.47 (t,  $J = 10.2$  Hz, 1H), 3.62 (d,  $J = 12.0$  Hz, 1H), 3.94 (dd,  $J$

= 10.2, 6.4 Hz, 1H), 4.07 (dd,  $J = 10.2, 7.1$  Hz, 1H), 4.90 (dd,  $J = 10.8, 6.0$  Hz, 1H), 4.99 (d,  $J = 10.1$  Hz, 1H), 5.07 (d,  $J = 17.0$  Hz, 1H), 5.73 (dt,  $J = 17.0, 6.4$  Hz, 1H), 6.18 (dd,  $J = 9.4, 6.1$  Hz, 1H), 6.54 (d,  $J = 9.6$  Hz, 1H), 7.06 - 7.13 (m, 2H), 7.19 (t,  $J = 7.5$  Hz, 1H), 7.36 (bs, 1H);  **$^{13}\text{C}$  NMR (150.9 MHz,  $\text{CDCl}_3$ )**: 155.97, 136.40, 133.71, 128.78, 127.37, 127.27, 126.29, 125.18, 124.64, 124.59, 116.72, 72.98, 59.86, 52.64, 43.32, 31.10, 27.81, 19.21, 19.09; **MS (EI)**: ( $\text{C}_{19}\text{H}_{25}\text{NO}_3$ ), 315.3 (2,  $\text{M}^+$ ), 230.3 (88,  $\text{M}^+ - 85$ ), 130.2 (64,  $\text{M}^+ - (85 + 101)$ ); **IR (film)**: 3474, 2962, 2881, 1676, 1490, 1465, 1406, 1325, 1276, 1131, 1023, 914, 765, 733  $\text{cm}^{-1}$ ;  $[\alpha]_{\text{D}} = +288.7$  ( $c = 3.5$ ,  $\text{CHCl}_3$ , 84% ee); **HPLC conditions**: AD-H column, *n*-hexane/2-propanol = 90/10, flow rate = 1.0 mL/min, major enantiomer:  $t_{\text{R}} = 7.56$  min, minor enantiomer:  $t_{\text{R}} = 15.55$  min.

#### Ethyl 2-(1-hydroxypropan-2-yl)-3,4-dihydroquinoline-1(2H)-carboxylate (4)

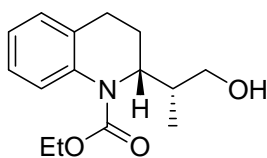

**$^1\text{H}$  NMR (600 MHz,  $\text{CDCl}_3$ )**:  $\delta = 1.01$  (d,  $J = 6.9$  Hz, 3H), 1.28 (t,  $J = 7.1$  Hz, 3H), 1.44 - 1.54 (m, 1H), 1.76 (dt,  $J = 11.6, 5.5$  Hz, 1H), 2.24 (dt,  $J = 13.2, 6.4$  Hz, 1H), 2.67 (t,  $J = 6.9$  Hz, 2H), 3.30 - 3.39 (m, 1H), 3.71 (d,  $J = 11.4$  Hz, 1H), 4.17 (qd,  $J = 14.2, 7.1$  Hz, 1H), 4.30 (qd,  $J = 14.2, 7.1$  Hz, 1H), 4.39 - 4.46 (m, 1H), 7.04 (t,  $J = 7.4$  Hz, 1H), 7.10 (d,  $J = 7.4$  Hz, 1H), 7.14 (t,  $J = 7.7$  Hz, 1H), 7.32 (d,  $J = 6.9$  Hz, 1H);  **$^{13}\text{C}$  NMR (150.9 MHz,  $\text{CDCl}_3$ )**: 156.32, 136.36, 131.90, 127.97, 126.02, 125.34, 124.52, 64.44, 62.36, 54.10, 37.47, 27.08, 24.63, 14.38, 13.63; **MS (EI)**: ( $\text{C}_{15}\text{H}_{21}\text{NO}_3$ ), 263.1 (28,  $\text{M}^+$ ), 204.0 (96,  $\text{M}^+ - 59$ ), 160.0 (22,  $\text{M}^+ - (59 + 45)$ ), 132. (71,  $\text{M}^+ - (59 + 73)$ ); **IR (film)**: 3472, 3048, 2927, 1695, 1488, 1387, 1244, 1212, 1026, 936, 756  $\text{cm}^{-1}$ ;  $[\alpha]_{\text{D}} = +86.2$  ( $c = 2.9$ ,  $\text{CHCl}_3$ , 93% ee); **HPLC conditions**: AD-H column, *n*-hexane/2-propanol = 90/10, flow rate = 1.0 mL/min, major enantiomer:  $t_{\text{R}} = 8.17$  min, minor enantiomer:  $t_{\text{R}} = 9.24$  min.

#### 2-(quinolin-2-yl)propan-1-ol (5)

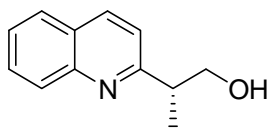

**$^1\text{H}$  NMR (400 MHz,  $\text{CDCl}_3$ )**:  $\delta = 1.41$  (d,  $J = 7.2$  Hz, 3H), 3.18 - 3.28 (m, 1H), 3.96 (dd,  $J = 11.0, 6.4$  Hz, 1H), 4.08 (dd,  $J = 11.0, 3.5$  Hz, 1H), 7.32 (d,  $J = 8.5$  Hz, 1H), 7.50 (ddd,  $J = 8.1, 6.9, 1.2$  Hz, 1H), 7.68 (ddd,  $J = 8.4, 6.9, 1.5$  Hz, 1H), 7.78 (dd,  $J = 8.1, 1.4$  Hz, 1H), 8.00 (ddd,  $J = 8.5, 1.8, 0.8$  Hz, 1H), 8.11 (dd,  $J = 8.5, 0.6$  Hz, 1H);  **$^{13}\text{C}$  NMR (100.6 MHz,  $\text{CDCl}_3$ )**: 165.61, 147.00, 136.80, 129.59, 128.82, 127.47, 126.80, 126.07, 120.70, 66.64, 42.23, 17.39; **MS (EI)**: ( $\text{C}_{12}\text{H}_{13}\text{NO}$ ), 187.4 (14,  $\text{M}^+$ ), 172.3 (63,  $\text{M}^+ - 15$ ), 170.3 (99,  $\text{M}^+ - 17$ ), 156.0 (91,  $\text{M}^+ - 31$ ); **IR (film)**: 3389, 2925, 1668, 1603, 1566, 1503, 1457, 1429, 1382, 1309, 1218, 1037, 977, 832, 756, 664, 621, 480  $\text{cm}^{-1}$ ;  $[\alpha]_{\text{D}} = +2.7$  ( $c = 3.6$ ,  $\text{CHCl}_3$ , 92% ee); **HPLC conditions**: AD-H column, *n*-hexane/2-propanol = 97/03, flow rate = 1.0 mL/min, minor enantiomer:  $t_{\text{R}} = 23.26$  min, major enantiomer:  $t_{\text{R}} = 24.20$  min.

**Ethyl 3,4-benzo-8-methyl-6-oxa-2-aza-bicyclo[3.3.1]nonane-2-carboxylate (6a)**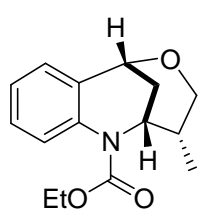

<sup>1</sup>H NMR (600 MHz, CDCl<sub>3</sub>): δ = 0.82 (d, *J* = 6.8 Hz, 3H), 1.34 (t, *J* = 7.1 Hz, 3H), 2.00 (d, *J* = 13.2 Hz, 1H), 2.06 - 2.15 (m, 1H), 2.24 (td, *J* = 13.2, 3.0 Hz, 1H), 2.75 (t, *J* = 12.1 Hz, 1H), 3.43 (dd, *J* = 12.0, 6.2 Hz, 1H), 4.21 - 4.30 (m, 2H), 4.74 (s, 1H), 4.83 (d, *J* = 3.1 Hz, 1H), 7.20 - 7.26 (m, 1H), 7.04 (t, *J* = 7.3 Hz, 1H), 7.28 (t, *J* = 7.9 Hz, 1H), 8.23 (d, *J* = 8.6 Hz, 1H); <sup>13</sup>C NMR (150.9 MHz, CDCl<sub>3</sub>): 155.03, 140.18, 130.38, 128.85, 124.45, 123.10, 120.57, 68.20, 63.66, 62.00, 51.07, 35.06, 29.64, 14.42, 13.68; **MS (EI)**: (C<sub>15</sub>H<sub>19</sub>NO<sub>3</sub>), 262.1 (13, M<sup>+</sup> + 1), 261.0 (99, M<sup>+</sup>), 202.0 (47, M<sup>+</sup> - 59), 130.0 (64, M<sup>+</sup> - (59 + 73)); **IR (film)**: 2954, 1706, 1599, 1480, 1384, 1301, 1213, 1131, 1050, 979, 937, 862, 761, 595, 505 cm<sup>-1</sup>; [α]<sub>D</sub> = +21.4 (c = 6.2, CHCl<sub>3</sub>, 93% ee); **HPLC conditions**: AD-H column, *n*-hexane/2-propanol = 97/03, flow rate = 0.5 mL/min, minor enantiomer: t<sub>R</sub> = 19.56 min, major enantiomer: t<sub>R</sub> = 25.13 min.

**Ethyl 3,4-(3-chloro-benzo)-5-chloro-8-methyl-6-oxa-2-aza-bicyclo[3.3.1]nonane-2-carboxylate (6c)**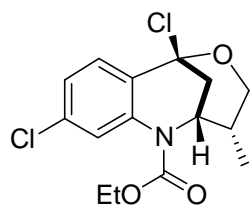

<sup>1</sup>H NMR (400 MHz, CDCl<sub>3</sub>): δ = 0.82 (d, *J* = 6.8 Hz, 3H), 1.34 (t, *J* = 7.1 Hz, 3H), 2.07 - 2.21 (m, 1H), 2.59 (d, *J* = 3.5 Hz, 2H), 2.79 (t, *J* = 12.3 Hz, 1H), 3.71 (dd, *J* = 12.3, 6.4 Hz, 1H), 4.24 - 4.33 (m, 2H), 4.88 (q, *J* = 3.6 Hz, 1H), 7.10 (dd, *J* = 8.5, 2.1 Hz, 1H), 7.75 (d, *J* = 8.5 Hz, 1H), 8.22 (d, *J* = 2.1 Hz, 1H); <sup>13</sup>C NMR (100.6 MHz, CDCl<sub>3</sub>): 154.30, 139.54, 135.60, 129.43, 123.88, 123.72, 120.75, 93.96, 68.54, 62.71, 54.10, 40.25, 33.44, 14.34, 12.75; **MS (EI)**: (C<sub>15</sub>H<sub>17</sub>Cl<sub>2</sub>NO<sub>3</sub>), 333.0 (4, M<sup>+</sup> + 4), 331.0 (15, M<sup>+</sup> + 2), 330.4 (18, M<sup>+</sup> + 1), 328.8 (42, M<sup>+</sup>), 179.8 (99, M<sup>+</sup> - 149); **IR (film)**: 2927, 2856, 1714, 1597, 1564, 1477, 1410, 1375, 1306, 1219, 1201, 1137, 1043, 934, 876, 824, 764, 601 cm<sup>-1</sup>; [α]<sub>D</sub> = +40.7 (c = 2.7, CHCl<sub>3</sub>, 93% ee); **HPLC conditions**: AD-H column, *n*-hexane/2-propanol = 97/03, flow rate = 1.0 mL/min, minor enantiomer: t<sub>R</sub> = 13.98 min, major enantiomer: t<sub>R</sub> = 15.63 min.

**X-Ray crystal structure analysis.<sup>#</sup>**

**Major diastereomer – (R)-Ethyl 6-bromo-2-((R)-1-hydroxypropan-2-yl)quinoline-1(2H)-carboxylate (3j)**

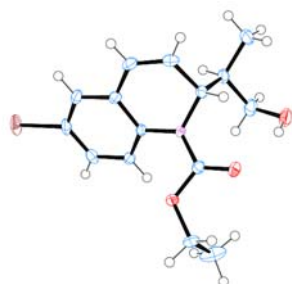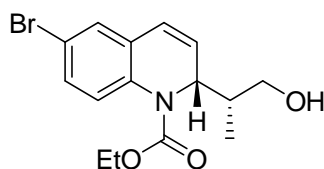

**Ethyl 3,4-benzo-8-methyl-6-oxa-2-aza-bicyclo[3.3.1]nonane-2-carboxylate (6a)**

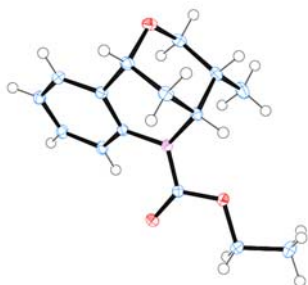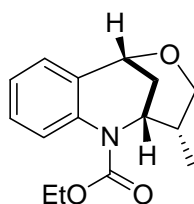

<sup>#</sup> CCDC 1414145-1414146 contain the supplementary crystallographic data for this publication. These data can be obtained free of charge from The Cambridge Crystallographic Data Centre via [www.ccdc.cam.ac.uk/data\\_request/cif](http://www.ccdc.cam.ac.uk/data_request/cif).

**DTF Calculations**

The geometry optimization and frequency calculations of the transition states TS1 and TS2 (only the most stable structures are shown) were performed using Gaussian09 program package<sup>[1-3]</sup> at the B3LYP/6-31G\* level.<sup>[4,5]</sup> The thermal corrections were calculated at 298 K. Solvent effects (toluene) were taken into account at the PCM/B3LYP/6-31G\*\*/B3LYP/6-31G\* level.<sup>[6]</sup> The corrections for dispersion interactions were estimated with the DFT-D3 program developed by Grimme.<sup>[7]</sup>

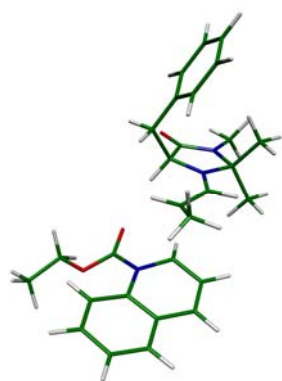

TS1 (0.0 kcal/mol)

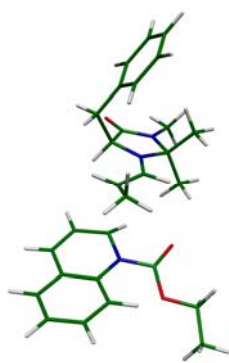

TS2 (1.29 kcal/mol)

$\Delta G_{TS1} = -1476.874595$  a.u.;  $\Delta G_{TS2} = -1476.872537$  a.u.

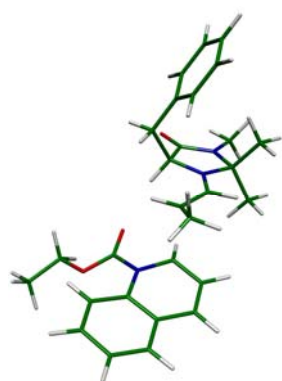

TS1

|   |             |             |             |
|---|-------------|-------------|-------------|
| N | -1.70671800 | -0.30969400 | 0.71018000  |
| C | -1.79068100 | 0.94570400  | -0.05274500 |
| C | -2.83148300 | 1.74050800  | 0.72844100  |
| N | -3.28600100 | 0.96581600  | 1.75719400  |
| C | -2.69895000 | -0.37165800 | 1.83720300  |
| C | -2.19691700 | 0.81209300  | -1.54701000 |
| C | -3.46764400 | 0.03486500  | -1.81456600 |
| C | -4.72612300 | 0.63972800  | -1.67003300 |
| C | -5.89417500 | -0.08716600 | -1.90475200 |
| C | -5.82389700 | -1.42726700 | -2.29295700 |
| C | -4.57775800 | -2.03570100 | -2.45165000 |
| C | -3.41047400 | -1.30741600 | -2.21438800 |
| O | -3.19725300 | 2.86873800  | 0.44890600  |
| C | -4.33859100 | 1.42702200  | 2.64909600  |
| C | -3.74542200 | -1.47217700 | 1.59868000  |
| C | -1.97402000 | -0.56897000 | 3.17984700  |
| H | -0.83321200 | 1.47535400  | -0.00133200 |
| H | -5.23408200 | 0.80272900  | 2.56390300  |
| H | -4.58391700 | 2.44541200  | 2.34410200  |
| H | -4.00337800 | 1.43718600  | 3.69136600  |
| H | -4.47833000 | -1.47389200 | 2.41106000  |
| H | -4.26420400 | -1.31518800 | 0.65079600  |
| H | -3.27447300 | -2.46054100 | 1.58575800  |
| H | -2.69113800 | -0.53140600 | 4.00492200  |
| H | -1.22792900 | 0.21686000  | 3.33352500  |
| H | -1.48473500 | -1.54727600 | 3.22535700  |



|   |             |             |             |
|---|-------------|-------------|-------------|
| H | -2.29817500 | 1.84640800  | -1.89449800 |
| H | -1.36671300 | 0.36862200  | -2.10531400 |
| H | -2.44222100 | -1.78358700 | -2.35515600 |
| H | -4.51377100 | -3.07283700 | -2.76945900 |
| H | -6.73388700 | -1.98894900 | -2.48391400 |
| H | -6.86028800 | 0.39805500  | -1.79667300 |
| H | -4.78717100 | 1.68478700  | -1.37873100 |
| C | -0.85153700 | -1.30508300 | 0.46636100  |
| H | -1.03404000 | -2.20826500 | 1.04690400  |
| C | 0.26300300  | -1.29257500 | -0.37014400 |
| H | 0.40076500  | -0.42788700 | -1.01234300 |
| C | 0.84745800  | -2.59540000 | -0.86145100 |
| H | 0.31948700  | -2.95022500 | -1.75641300 |
| H | 1.90126000  | -2.48963400 | -1.13500300 |
| H | 0.77402700  | -3.38502500 | -0.10545600 |
| H | 1.54187000  | -2.06028200 | 2.57003200  |
| C | 2.23797500  | -1.66527500 | 1.83819600  |
| H | 3.75938700  | -3.11459600 | 2.18701900  |
| C | 3.44775500  | -2.24488600 | 1.61555700  |
| N | 2.79452200  | 0.12934500  | 0.31859600  |
| C | 4.32778200  | -1.73613800 | 0.60281000  |
| C | 1.84863100  | -0.50720400 | 1.10649100  |
| C | 3.97693200  | -0.54953100 | -0.09829800 |
| C | 5.50761200  | -2.42176700 | 0.25127200  |
| H | 1.11032200  | 0.16970400  | 1.50715600  |
| H | 4.49914600  | 0.74571200  | -1.74918300 |
| C | 6.30481600  | -1.97504300 | -0.78807000 |
| H | 5.76894900  | -3.32148000 | 0.80101400  |
| H | 7.21018100  | -2.51036400 | -1.05493600 |
| C | 5.91916800  | -0.83581900 | -1.50708300 |
| H | 6.52131400  | -0.49421400 | -2.34336600 |
| C | 4.76900000  | -0.12768000 | -1.17534500 |
| C | 2.49097100  | 1.51105500  | 0.05175100  |
| O | 1.37892700  | 1.95373800  | 0.24795300  |
| O | 3.54145600  | 2.19991400  | -0.35411900 |
| C | 3.31855200  | 3.63841100  | -0.56990600 |
| H | 2.91756300  | 4.05168600  | 0.35848200  |
| H | 2.56175300  | 3.74368400  | -1.35140600 |
| C | 4.64908400  | 4.24819100  | -0.95364300 |
| H | 5.03224600  | 3.82083300  | -1.88530700 |
| H | 4.51617700  | 5.32454000  | -1.10335100 |
| H | 5.39315400  | 4.10176800  | -0.16525500 |

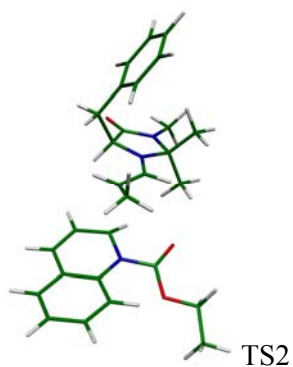

|   |             |             |             |
|---|-------------|-------------|-------------|
| N | -1.70767800 | 0.37766700  | -0.28322400 |
| C | -2.30787700 | -0.60215800 | -1.19814400 |
| C | -3.35450400 | 0.22696300  | -1.93985800 |
| N | -3.35674800 | 1.48486100  | -1.41580600 |
| C | -2.37914900 | 1.72308800  | -0.35238600 |
| C | -2.95843400 | -1.85596100 | -0.54821100 |
| C | -3.97186300 | -1.57217700 | 0.53984900  |
| C | -5.29519000 | -1.23112300 | 0.21966200  |
| C | -6.22055300 | -0.95622300 | 1.22755300  |
| C | -5.84082700 | -1.02417300 | 2.57011100  |
| C | -4.53084300 | -1.37515900 | 2.90035000  |
| C | -3.60575900 | -1.64727500 | 1.89080700  |
| O | -4.07131500 | -0.20074700 | -2.82778000 |
| C | -4.29459700 | 2.49849900  | -1.87440800 |
| C | -3.05811200 | 2.06836100  | 0.98166500  |
| C | -1.37183900 | 2.80660400  | -0.77297500 |
| H | -1.55957600 | -0.94264000 | -1.92592900 |
| H | -4.96524300 | 2.81096400  | -1.06741900 |
| H | -4.88387500 | 2.04412000  | -2.67216200 |
| H | -3.77180600 | 3.37523900  | -2.26994800 |
| H | -3.57569800 | 3.02882100  | 0.90082900  |
| H | -3.77857300 | 1.29674300  | 1.26142000  |
| H | -2.31508300 | 2.16769700  | 1.77948300  |
| H | -1.87576100 | 3.77419800  | -0.85564300 |
| H | -0.93379800 | 2.56199500  | -1.74596300 |
| H | -0.56692900 | 2.91360000  | -0.04131700 |
| H | -3.43064300 | -2.38191600 | -1.38556800 |
| H | -2.17309400 | -2.51259300 | -0.16215200 |
| H | -2.59116200 | -1.93695700 | 2.15651200  |
| H | -4.23174700 | -1.44745600 | 3.94245300  |
| H | -6.56482100 | -0.81867400 | 3.35342100  |
| H | -7.24321400 | -0.70158700 | 0.96352000  |
| H | -5.60027300 | -1.18777100 | -0.82243100 |
| C | -0.66376200 | 0.15231900  | 0.51460100  |
| H | -0.41309200 | 0.97729100  | 1.17561100  |
| C | 0.18612600  | -0.95641600 | 0.51917900  |
| H | -0.11322200 | -1.82815300 | -0.05348200 |
| C | 1.02990400  | -1.23492800 | 1.74130200  |
| H | 0.44119900  | -1.73307500 | 2.52286300  |
| H | 1.86888600  | -1.89543000 | 1.50694900  |
| H | 1.42792000  | -0.31079800 | 2.17543800  |
| H | 0.91788000  | -1.45500300 | -2.55718500 |
| C | 1.76852200  | -1.32165400 | -1.89761700 |
| H | 2.87846900  | -2.97238600 | -2.65125900 |
| C | 2.84107700  | -2.15240800 | -1.93989900 |
| N | 2.89680600  | 0.09318700  | -0.29179000 |
| C | 3.94192900  | -1.97489900 | -1.03452500 |
| C | 1.73632800  | -0.22197700 | -0.98274000 |
| C | 3.95784400  | -0.85243100 | -0.16303300 |
| C | 4.98530400  | -2.91899600 | -0.96309600 |
| H | 1.13616600  | 0.64256400  | -1.21682400 |
| H | 4.98123000  | 0.07488300  | 1.50134500  |
| C | 6.00189900  | -2.78531900 | -0.03320900 |
| H | 4.96526400  | -3.76657400 | -1.64223600 |
| H | 6.79993700  | -3.51881800 | 0.01744300  |
| C | 5.97790500  | -1.70306900 | 0.85585700  |

|   |            |             |            |
|---|------------|-------------|------------|
| H | 6.75460200 | -1.60281100 | 1.60778000 |
| C | 4.96999000 | -0.74610900 | 0.80083200 |
| C | 2.91383800 | 1.43293500  | 0.22610900 |
| O | 1.88703900 | 2.06873800  | 0.34583900 |
| O | 4.13400300 | 1.86953200  | 0.48370100 |
| C | 4.23276400 | 3.25616000  | 0.95965100 |
| H | 3.65721200 | 3.33337200  | 1.88572800 |
| H | 3.76601700 | 3.89655600  | 0.20733300 |
| C | 5.70214300 | 3.56213600  | 1.15449100 |
| H | 5.80915100 | 4.59931300  | 1.48828200 |
| H | 6.14852500 | 2.91309400  | 1.91400300 |
| H | 6.25708400 | 3.44434600  | 0.21925500 |

- [1] Gaussian 09, Revision A.02, Gaussian, Inc., Wallingford CT, 2009.
- [2] The calculations were performed using the computing resources of the computing center of RWTH Aachen.
- [3] Due to its non-coordinative nature, the counter anion was not taken into consideration for the calculations.
- [4] a) C. Lee, W. Yang and R. G. Parr, *Phys. Rev. B*, 1988, **37**, 785-789; b) B. Miehlich, A. Savin, H. Stoll and H. Preuss, *Chem. Phys. Lett.*, 1989, **157**, 200-206; c) A. D. Becke, *J. Chem. Phys.*, 1993, **98**, 5648-5652; d) P. J. Stephens, F. J. Devlin, C.F. Chabalowski and M. J. Frisch, *J. Phys. Chem.*, 1994, **98**, 11623-11627.
- [5] a) V. Barone and M. Cossi, *J. Phys. Chem. A*, 1998, **102**, 1995-2001; b) J. Tomasi, B. Mennucci and R. Cammi, *Chem. Rev.*, 2005, **105**, 2999-3093.
- [6] a) W. J. Hehre, R. Ditchfeld and J. A. Pople, *J. Chem. Phys.*, 1972, **56**, 2257-2261; b) C. Hariharan and J. A. Pople, *Theor. Chim. Acta*, 1973, **28**, 213-222.
- [7] S. Grimme, J. Antony, S. Ehrlich and H. Krieg, *J. Chem. Phys.*, 2010, **132**, 154104-154119.

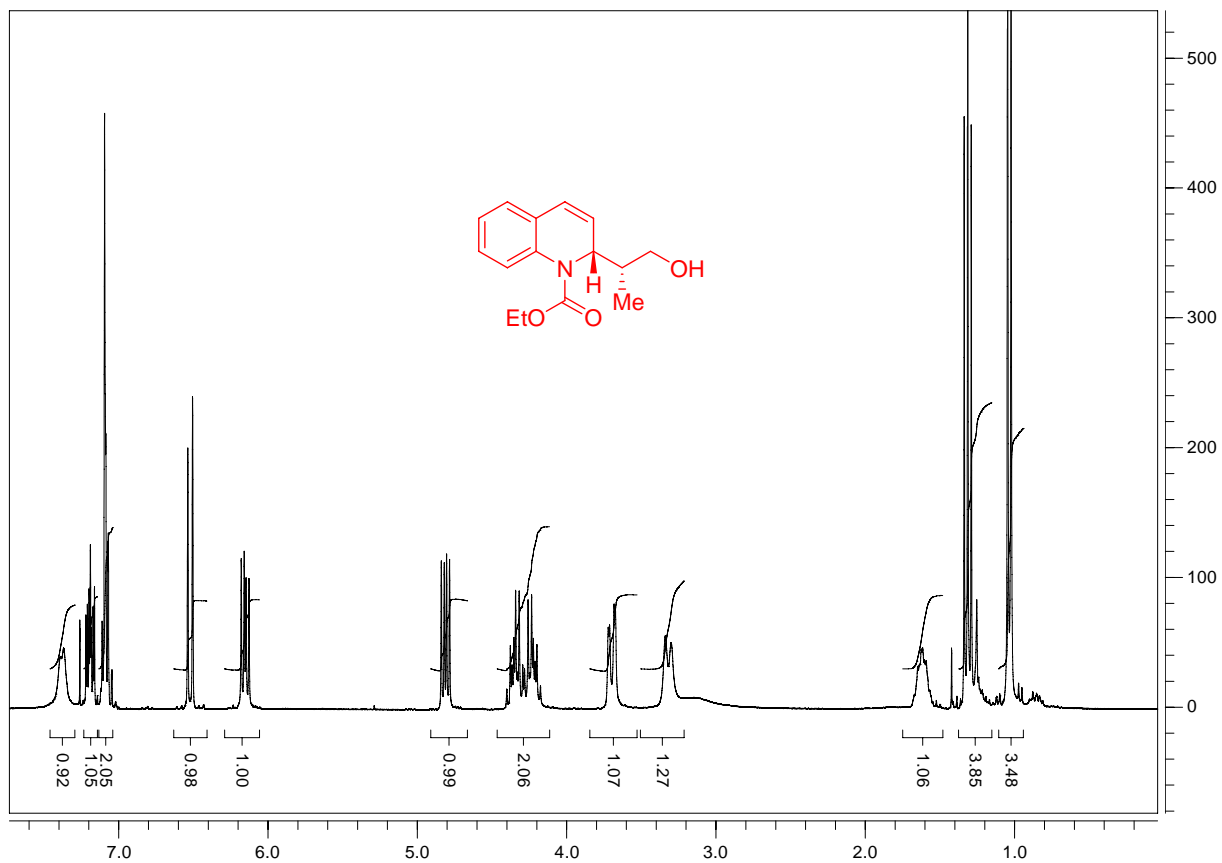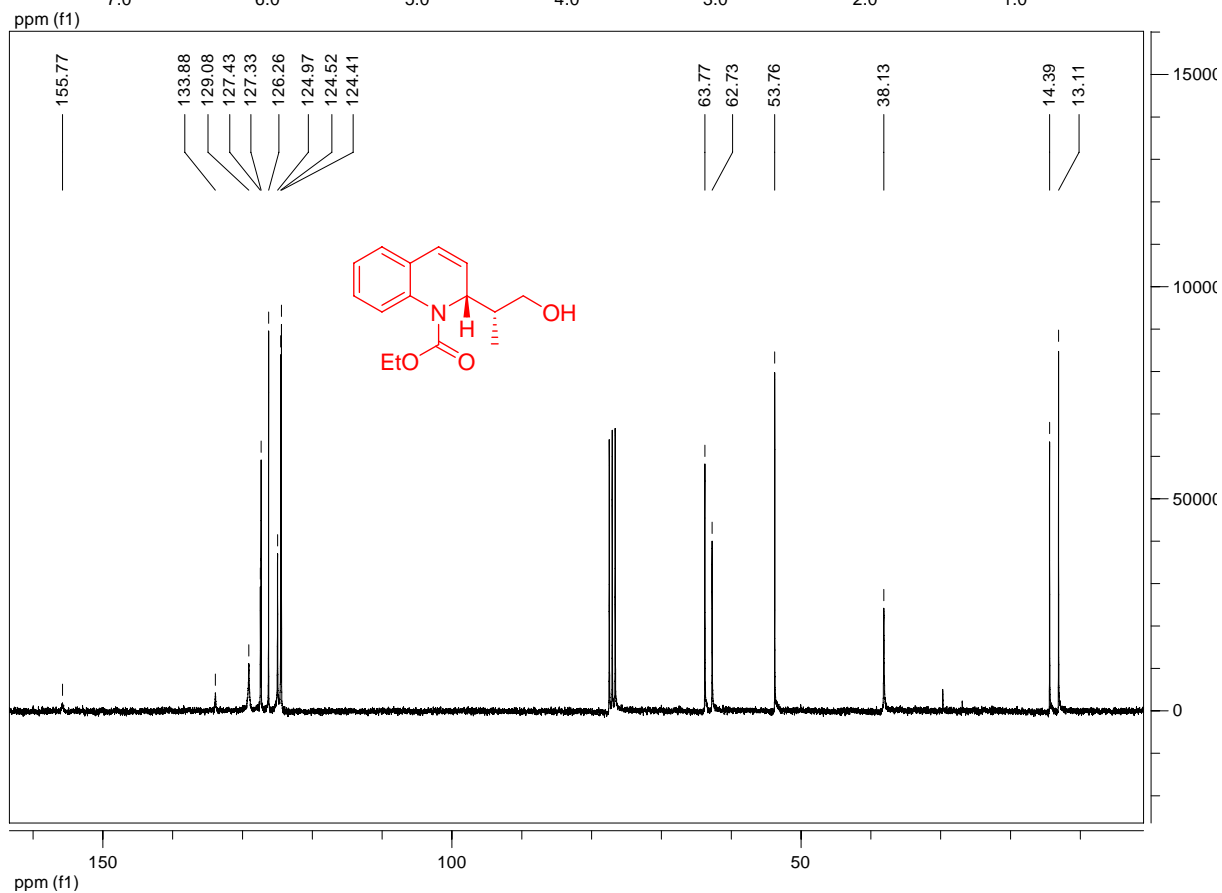

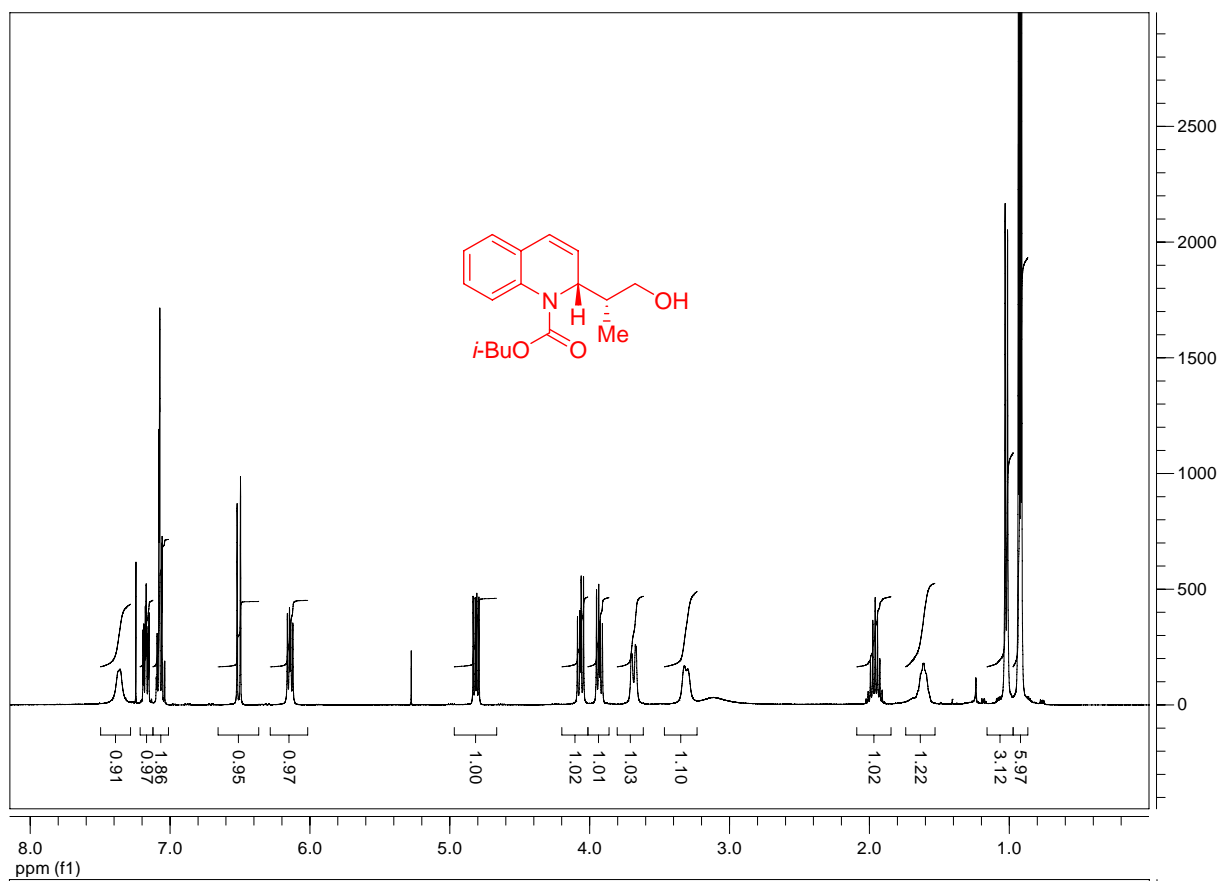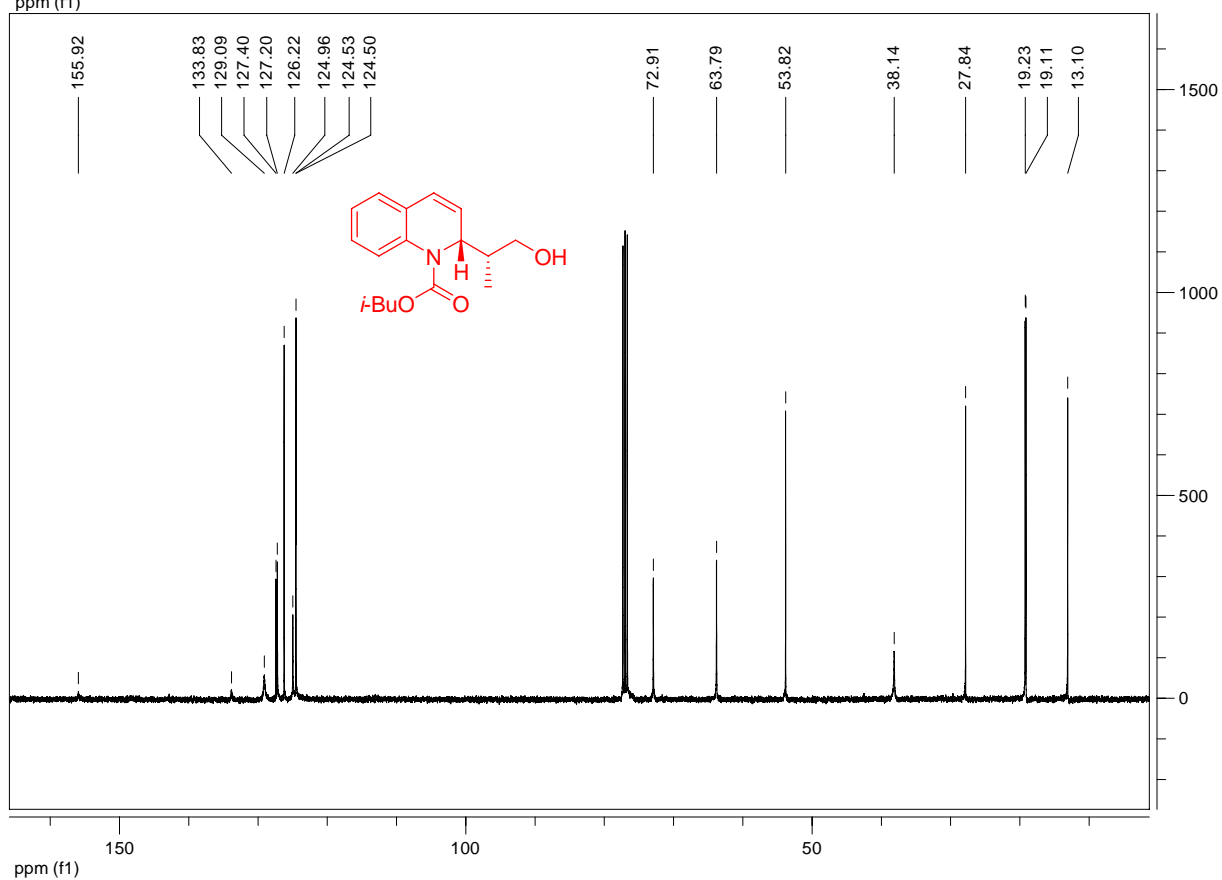

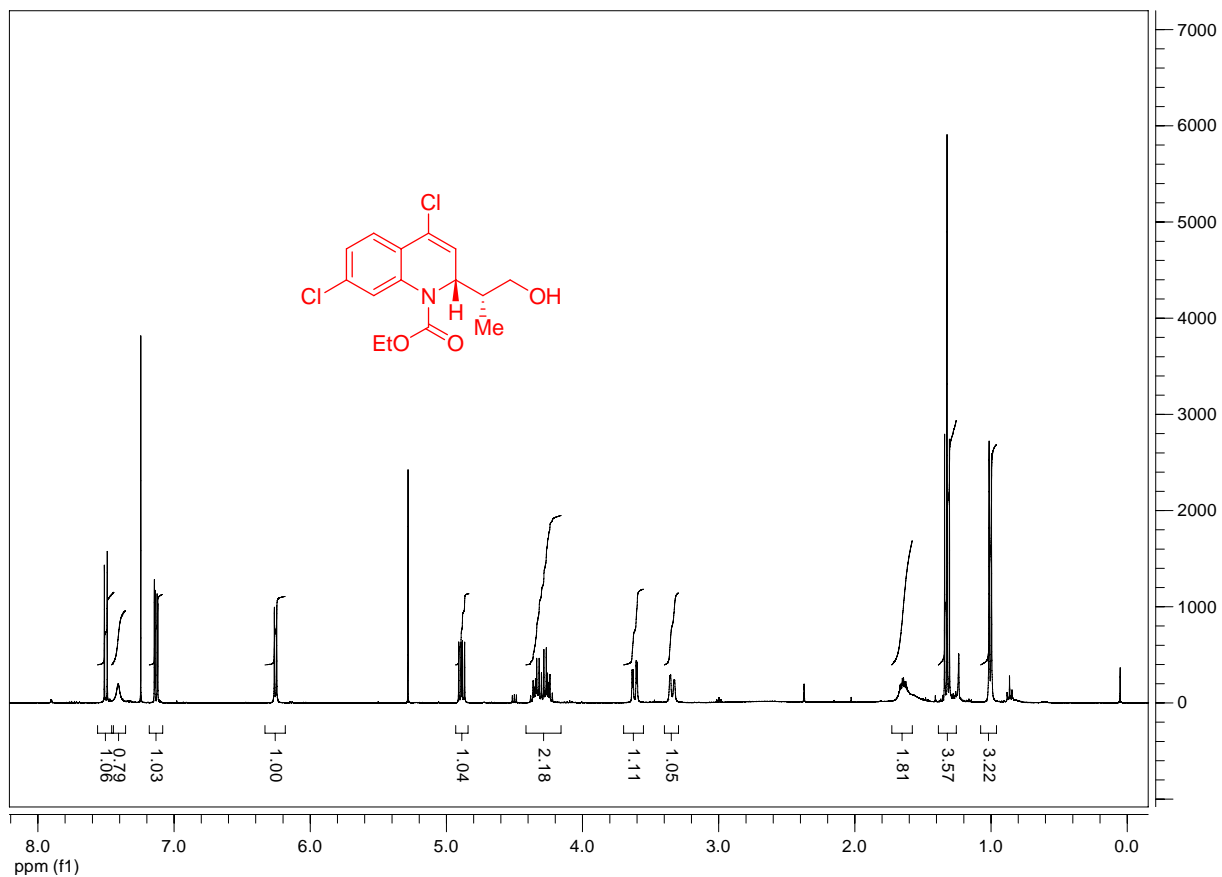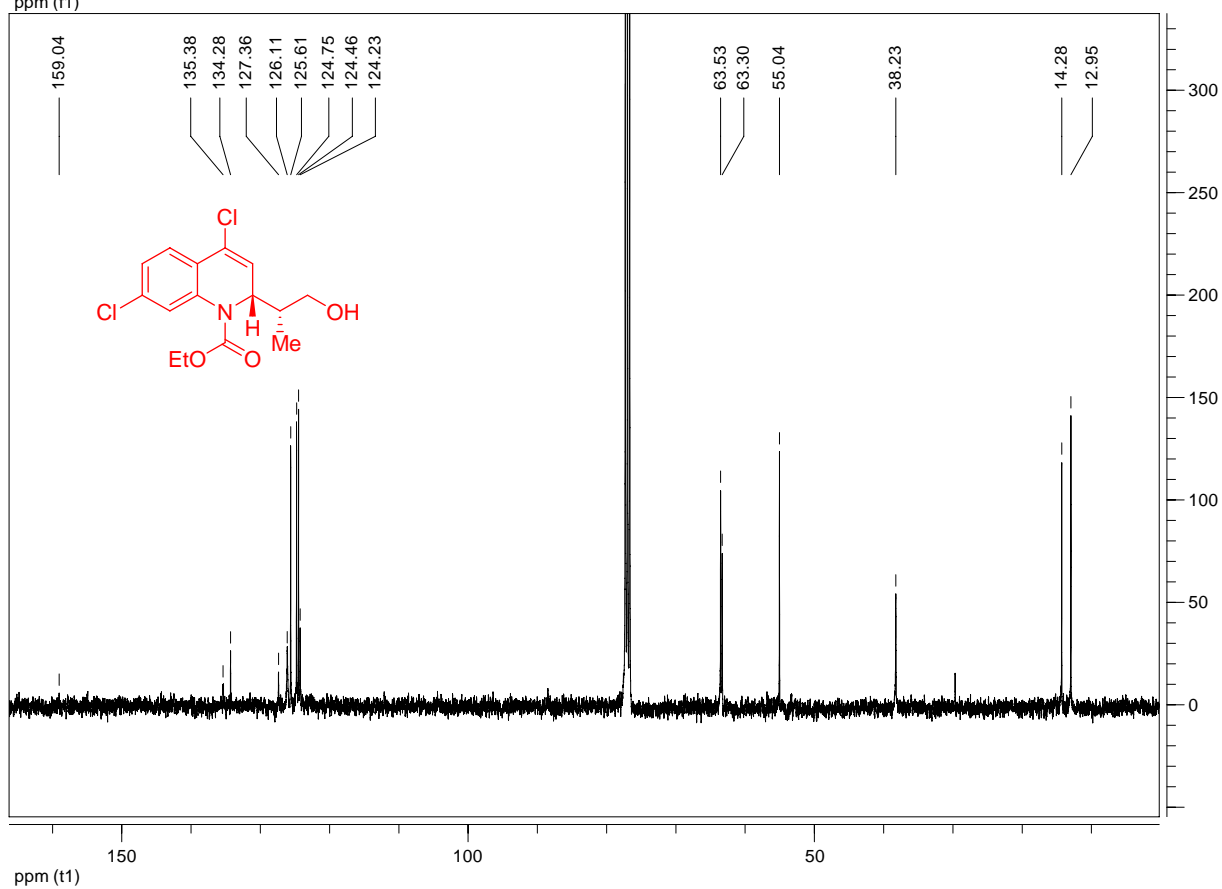

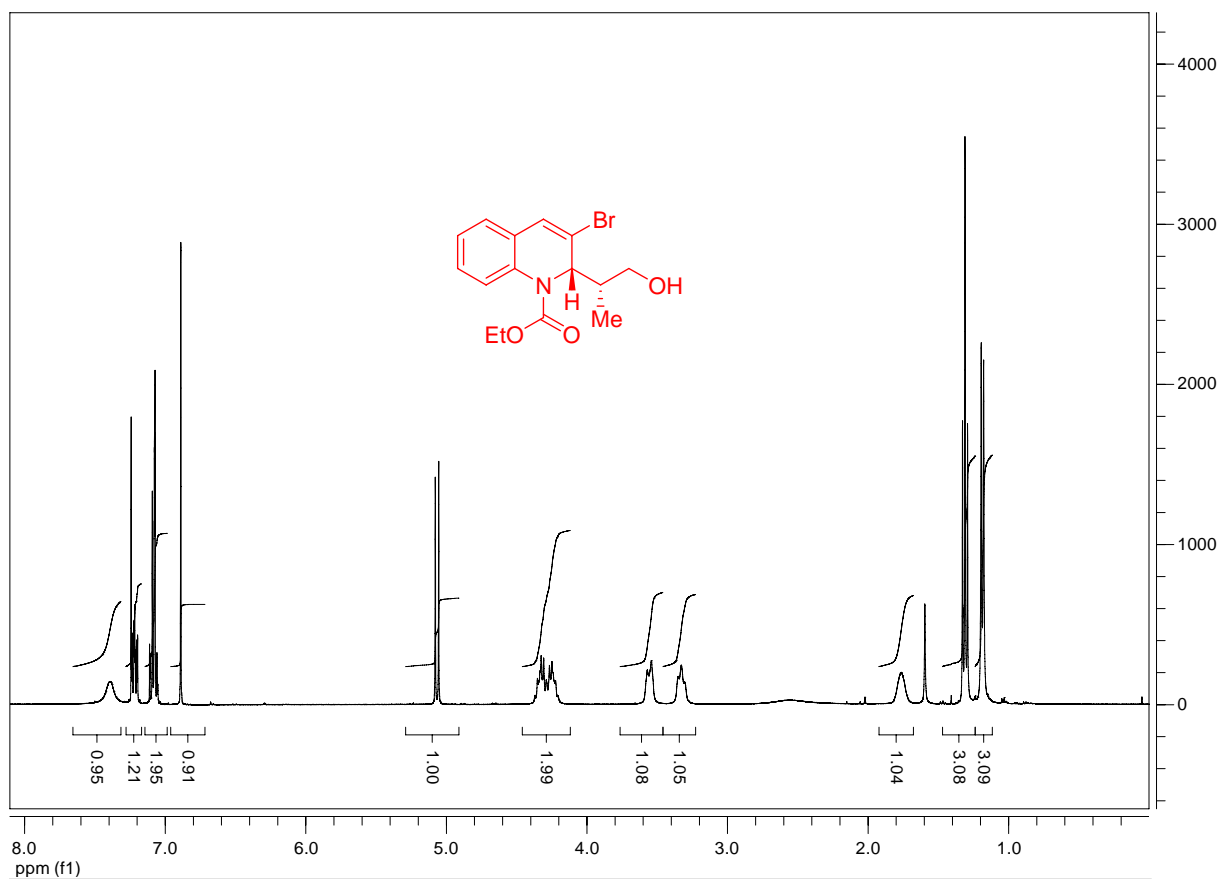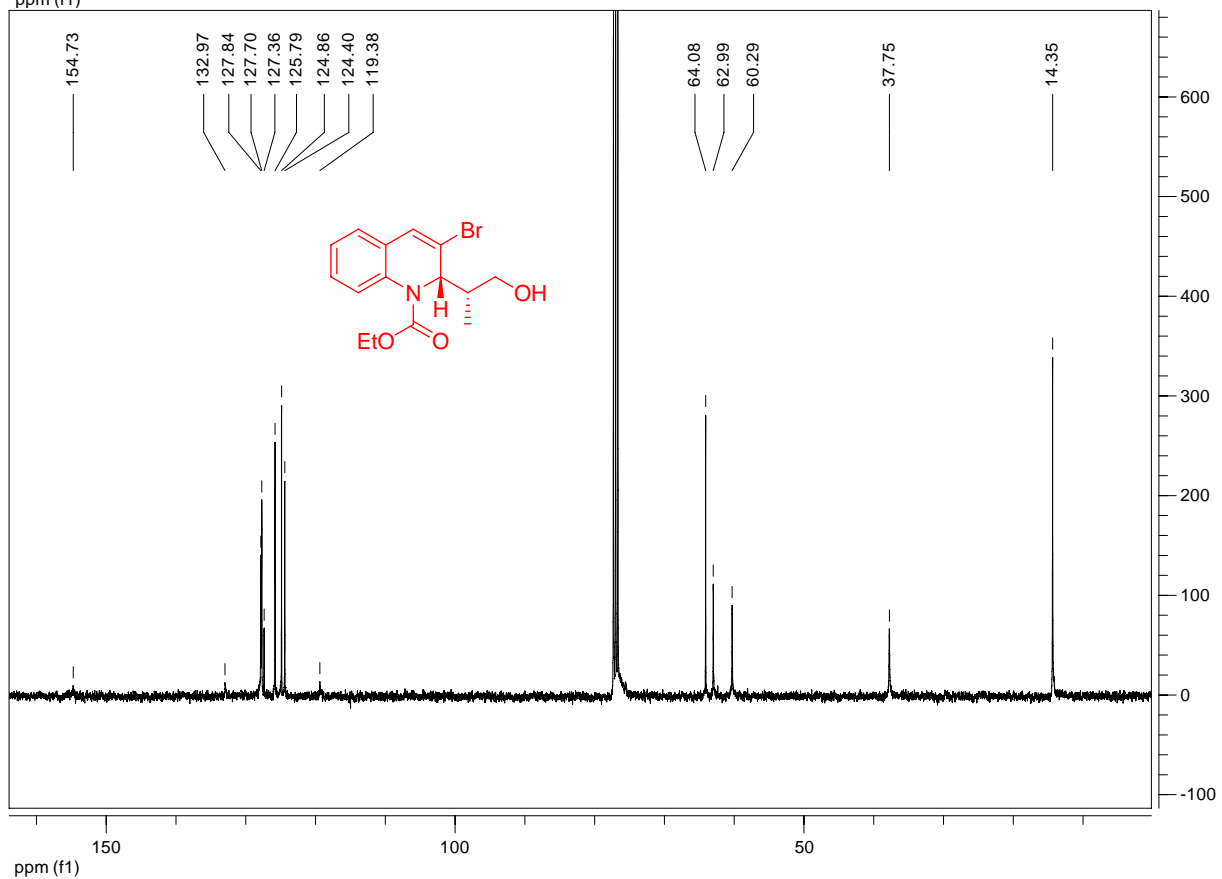

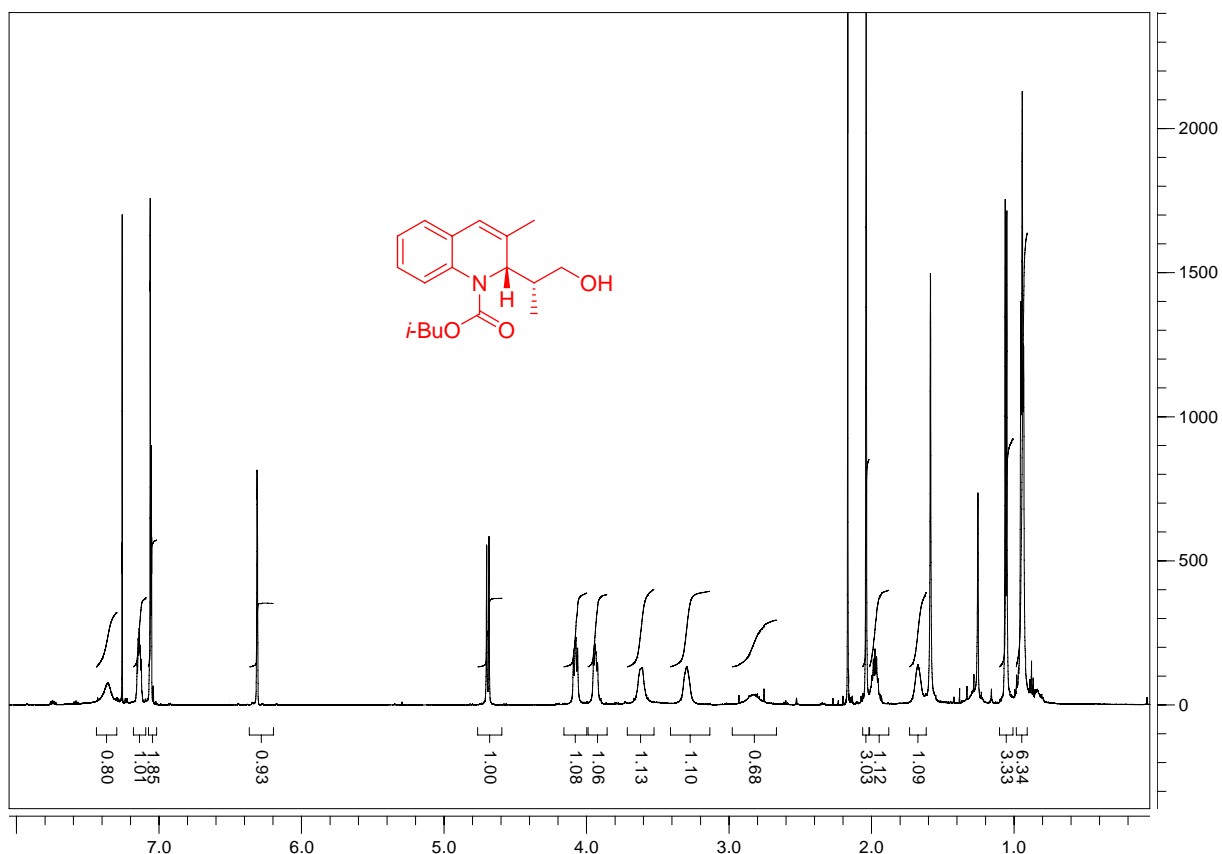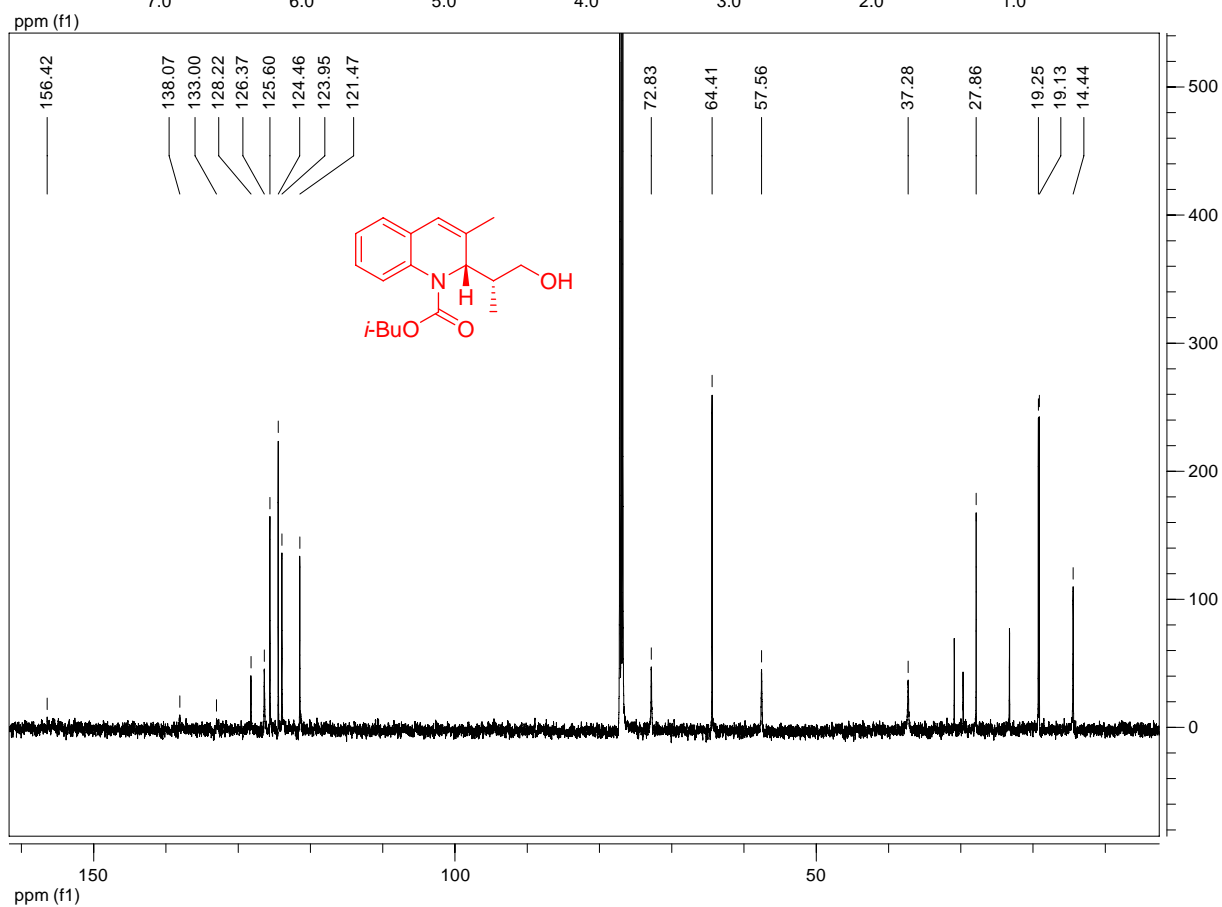



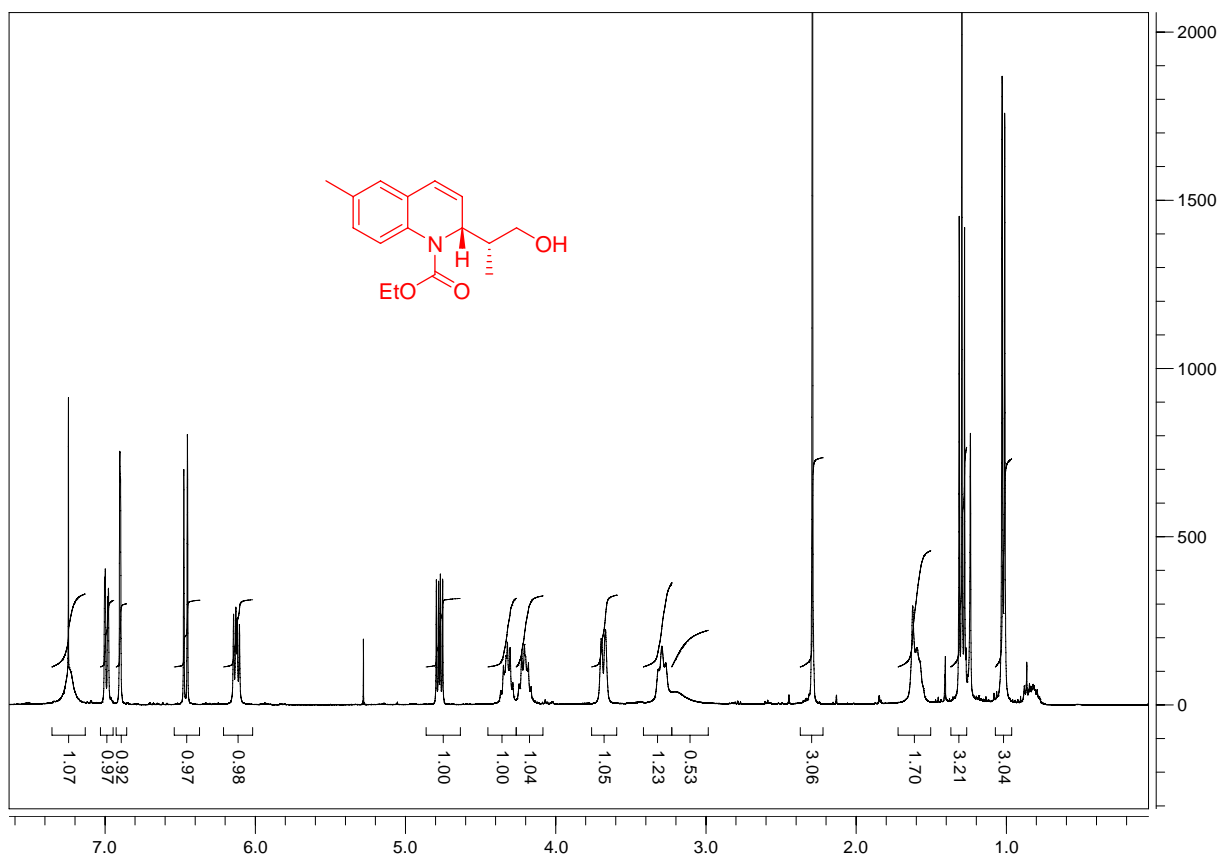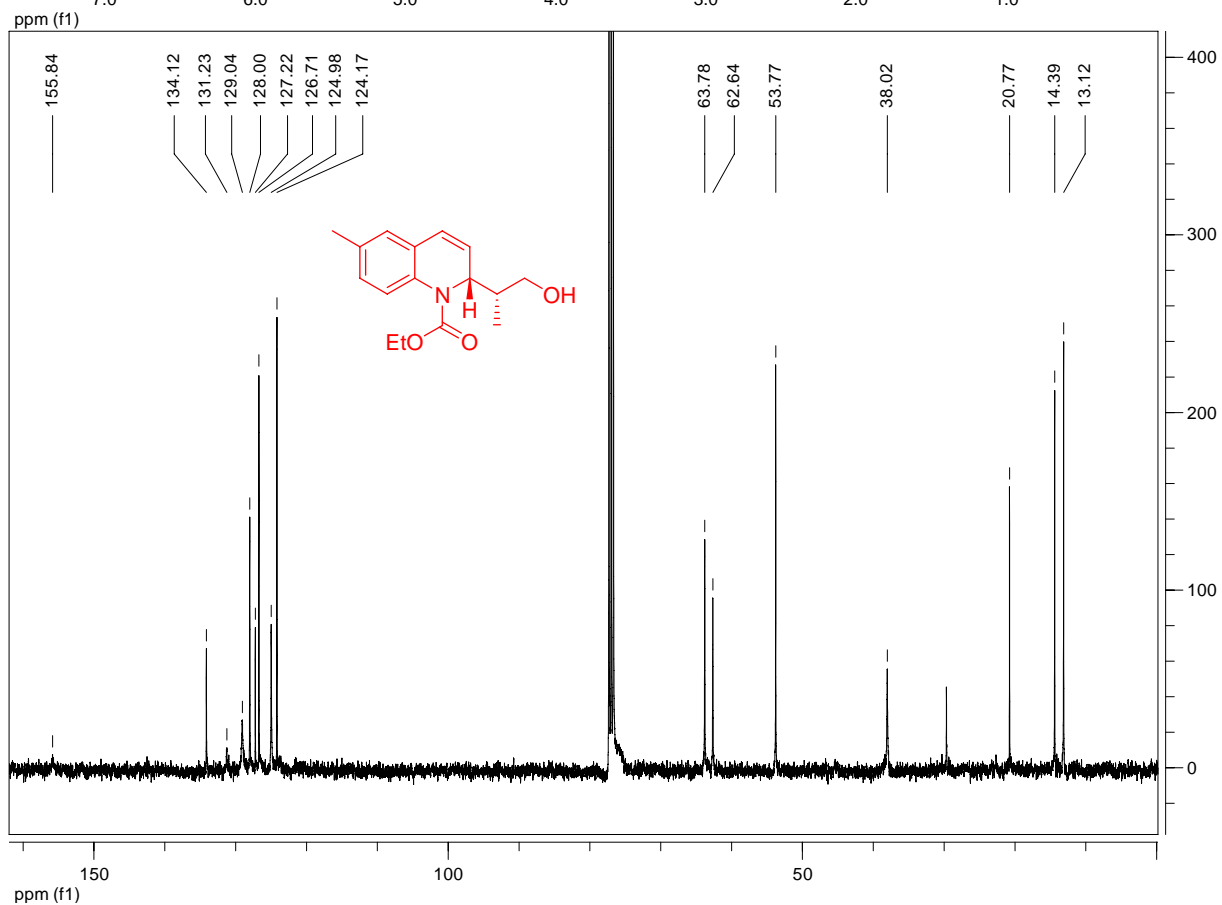

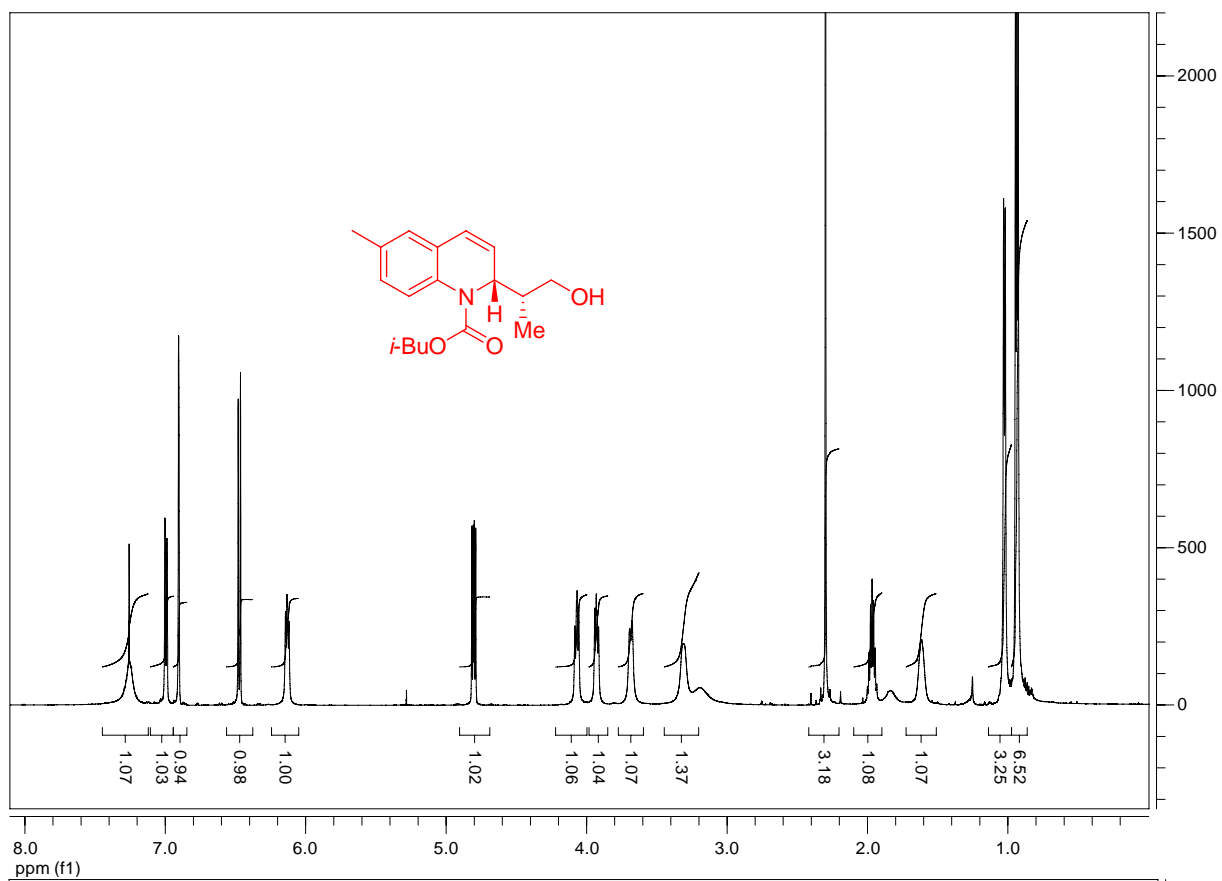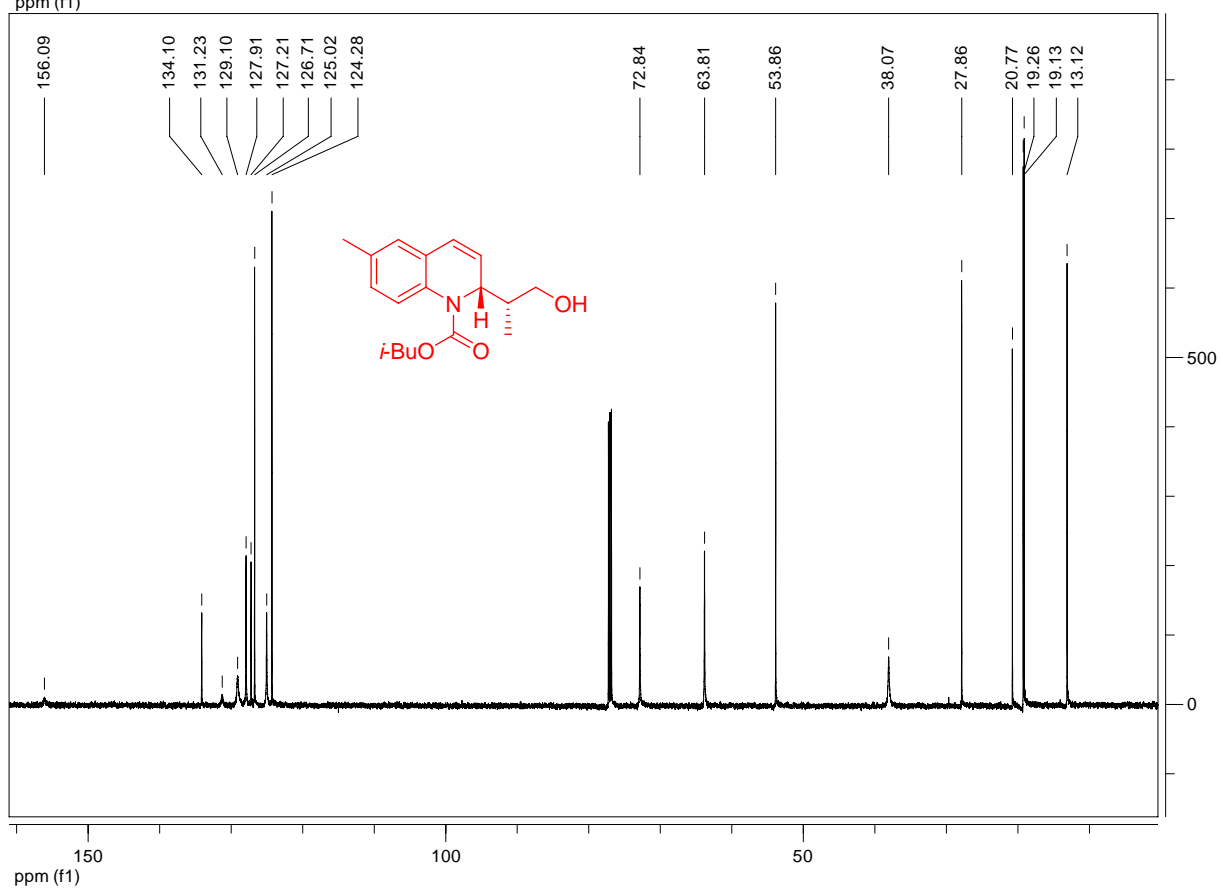

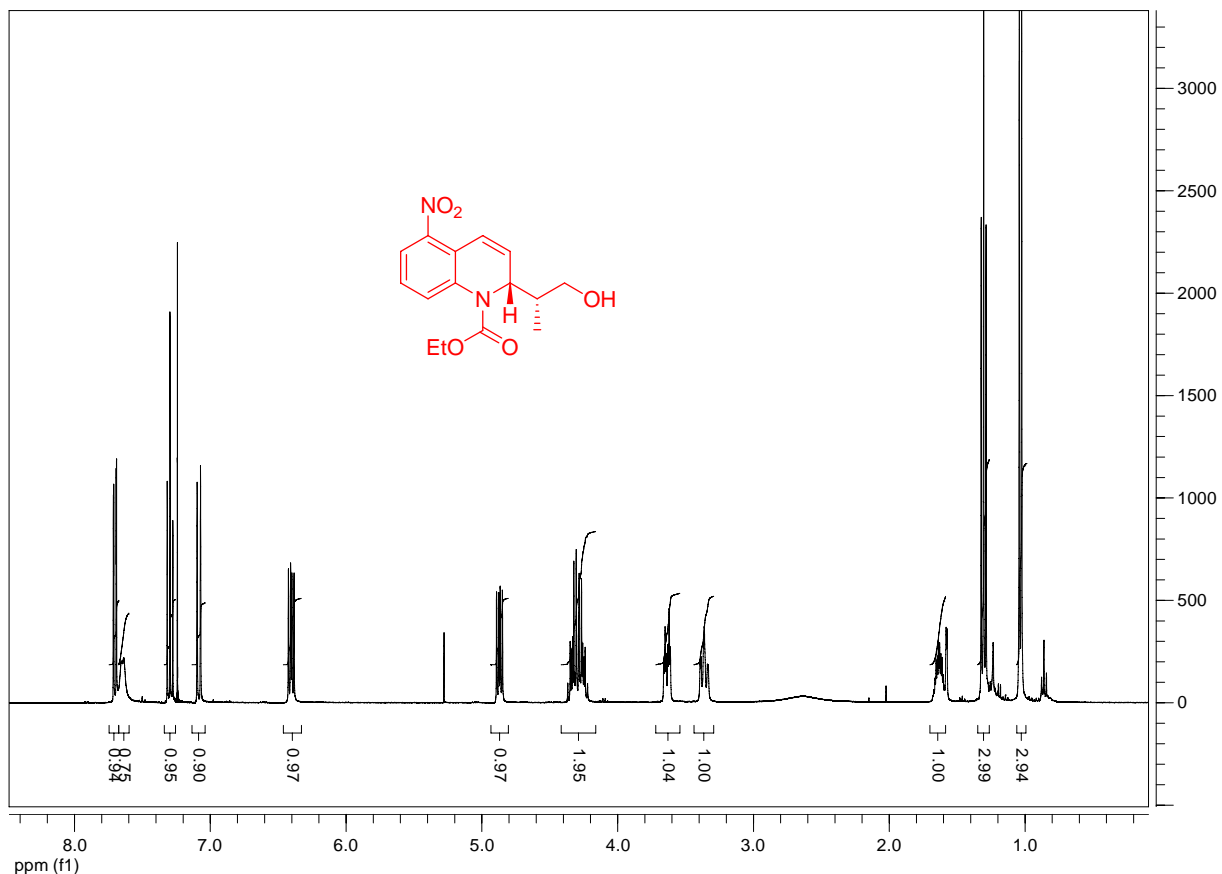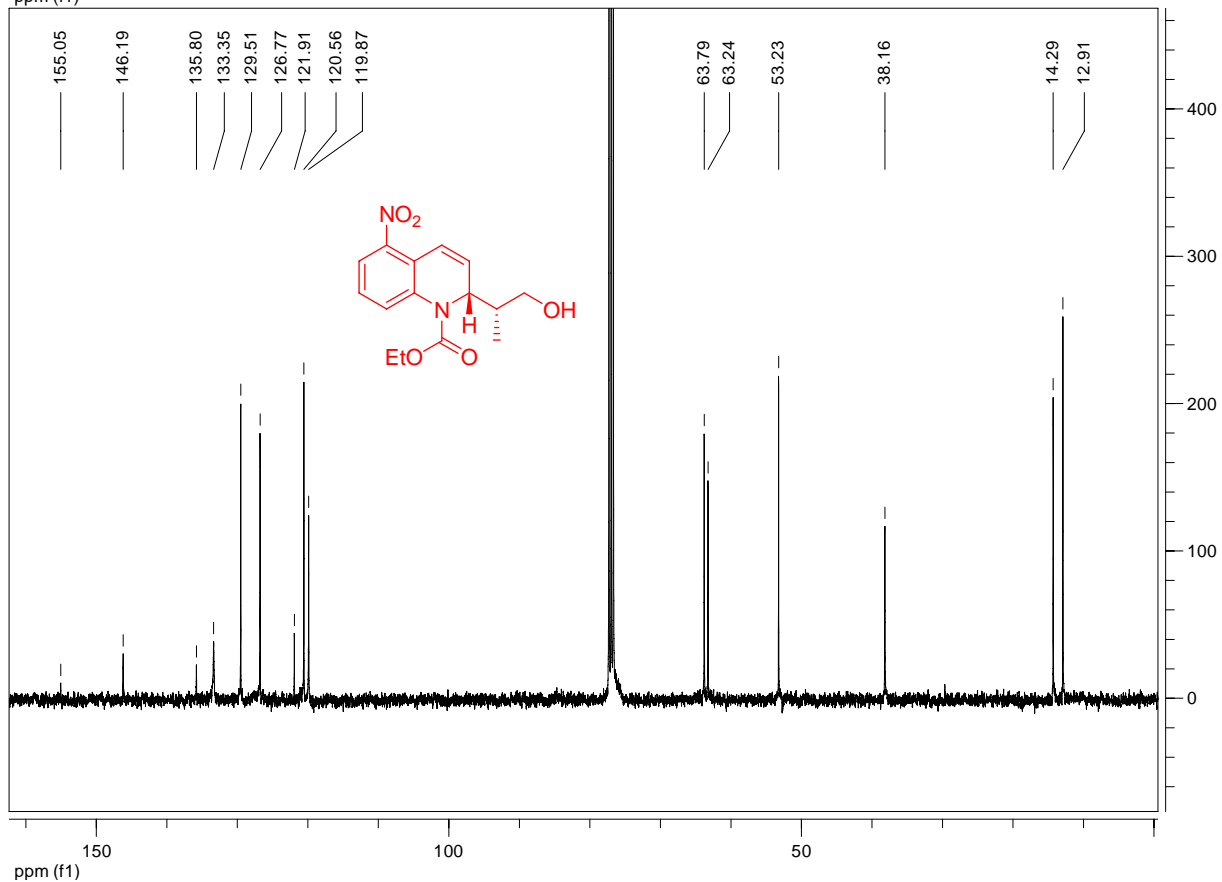

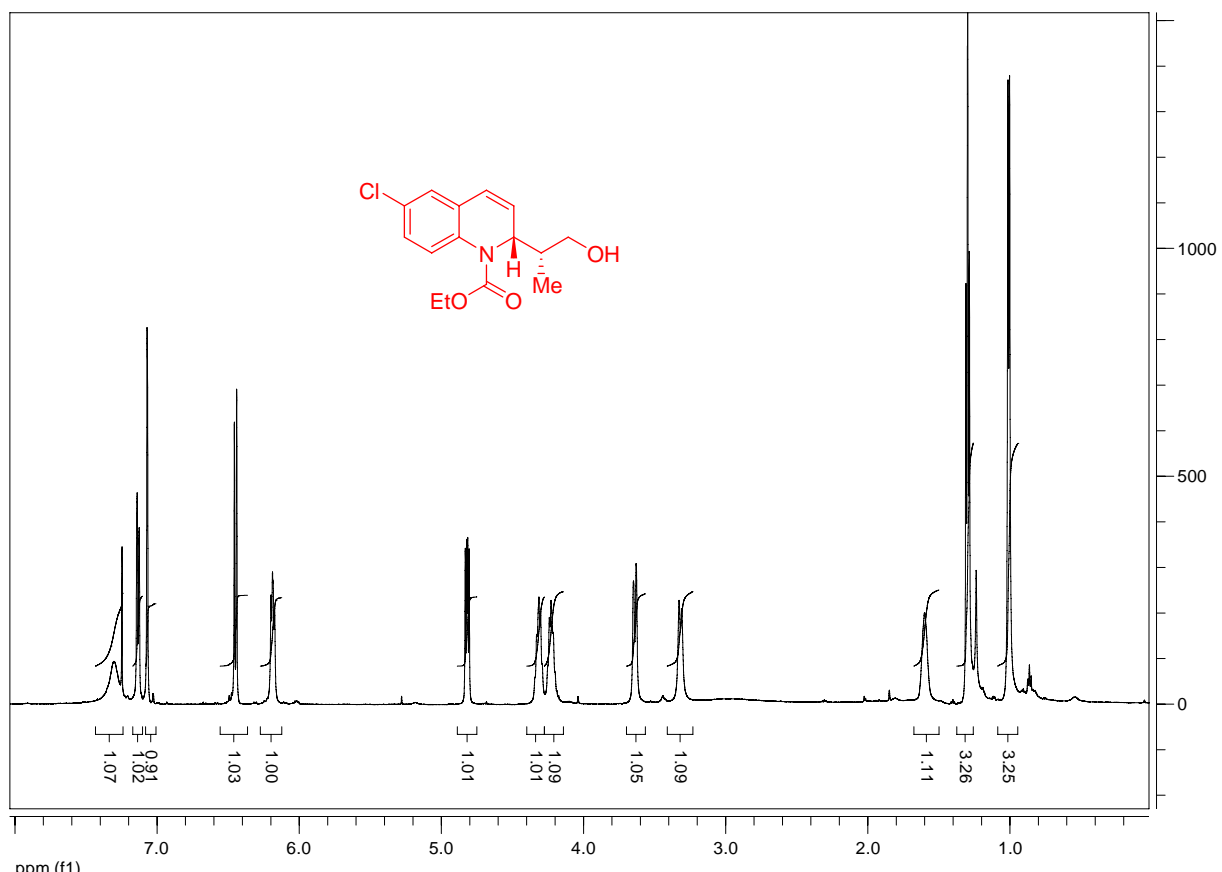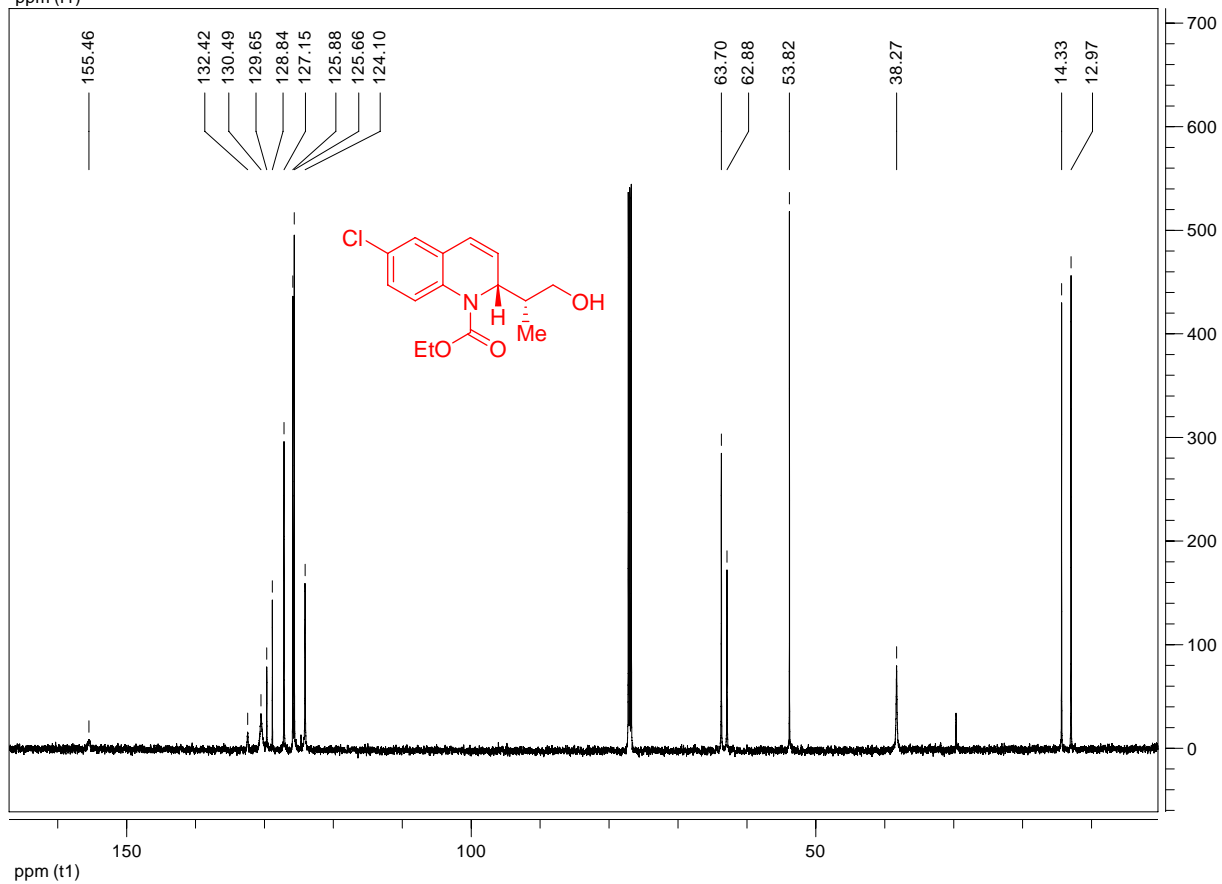

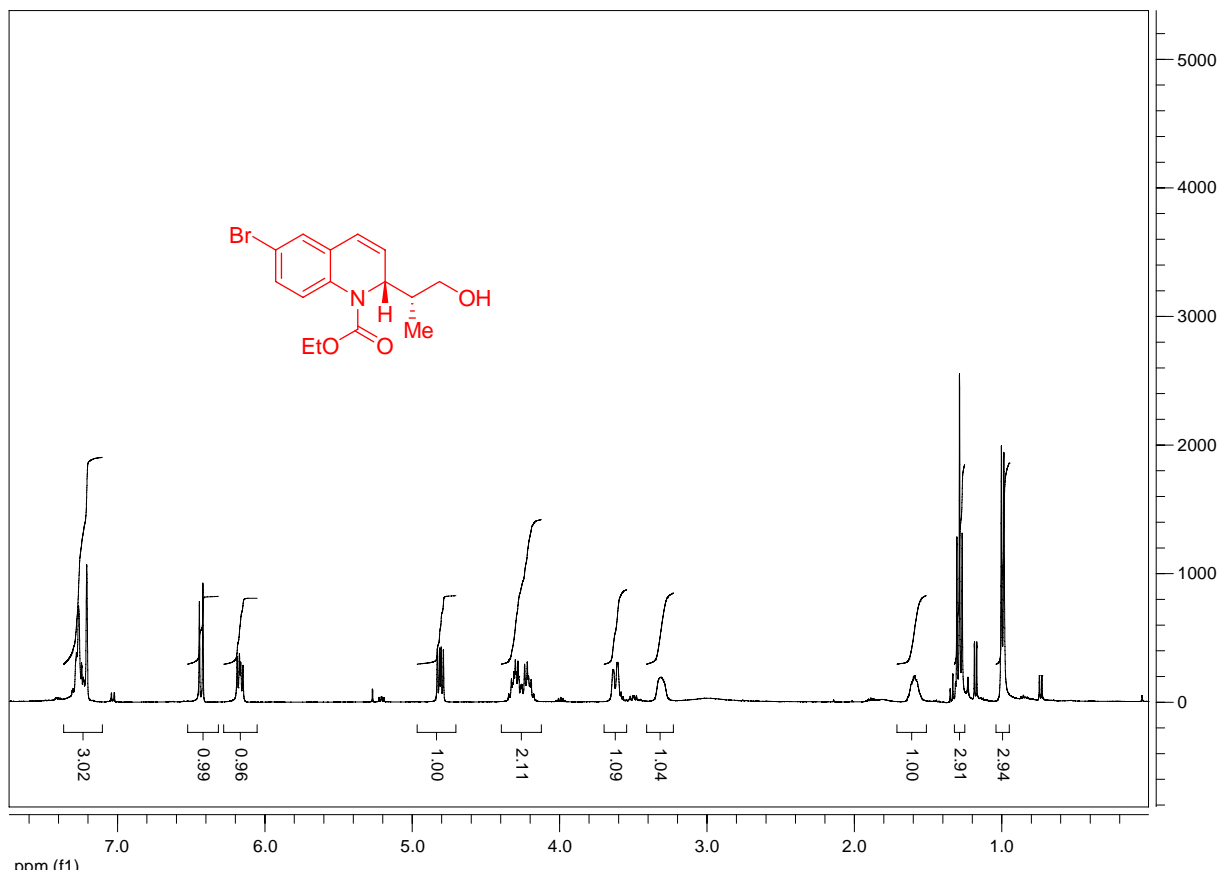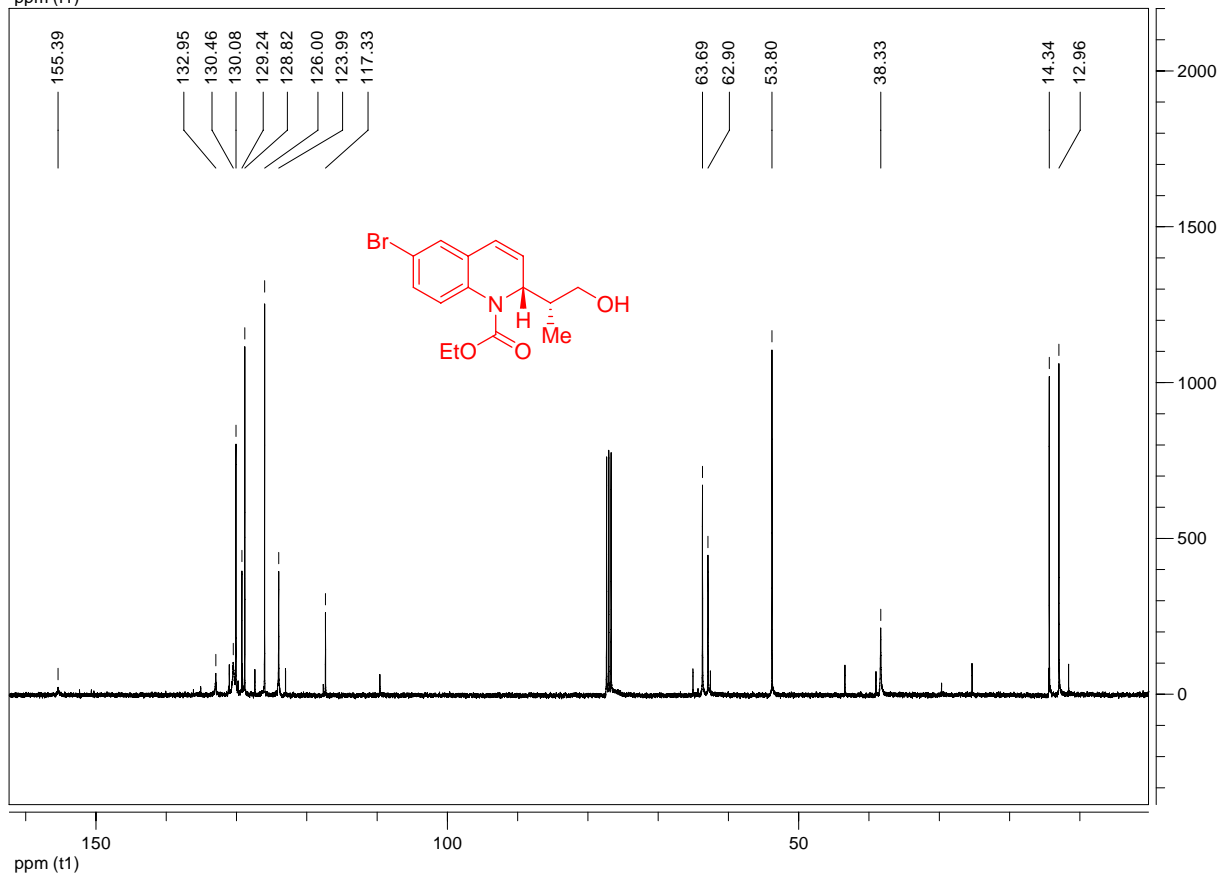

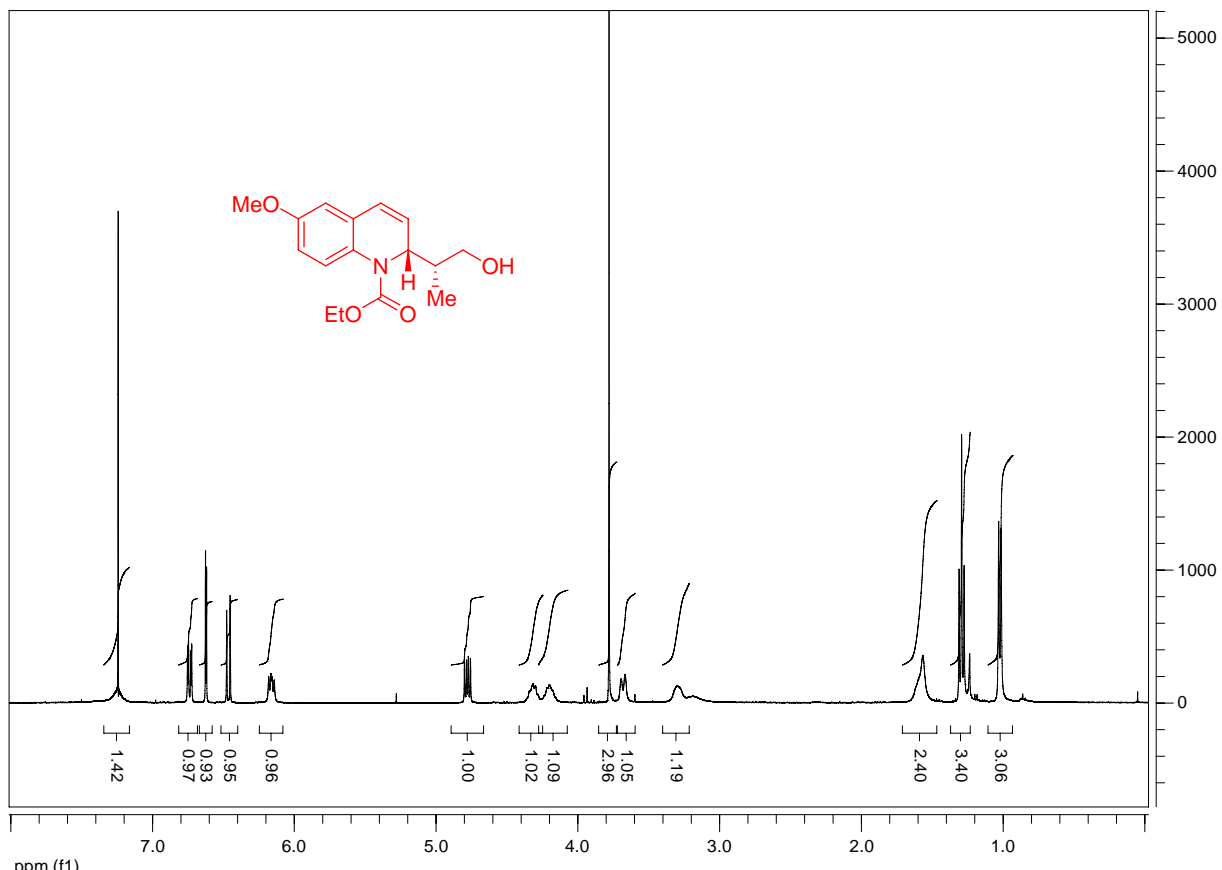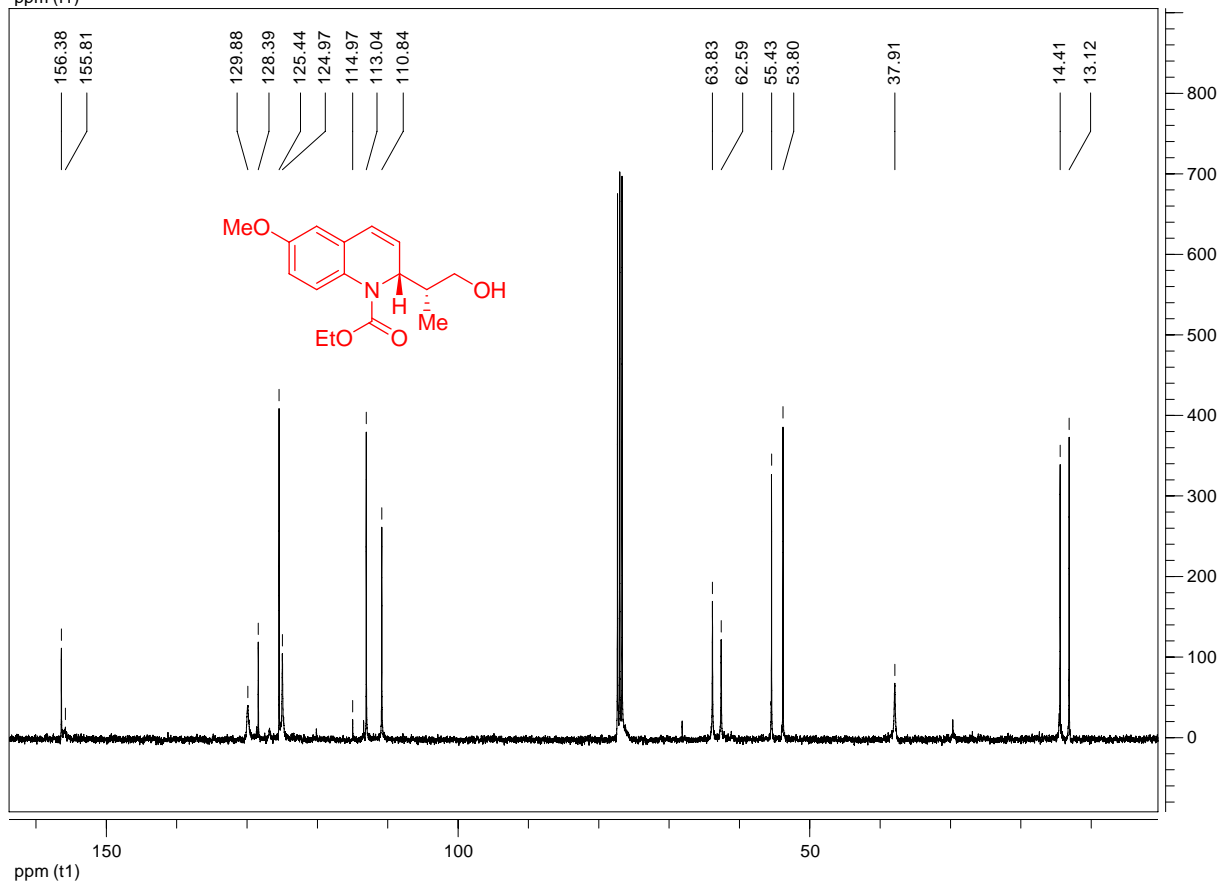

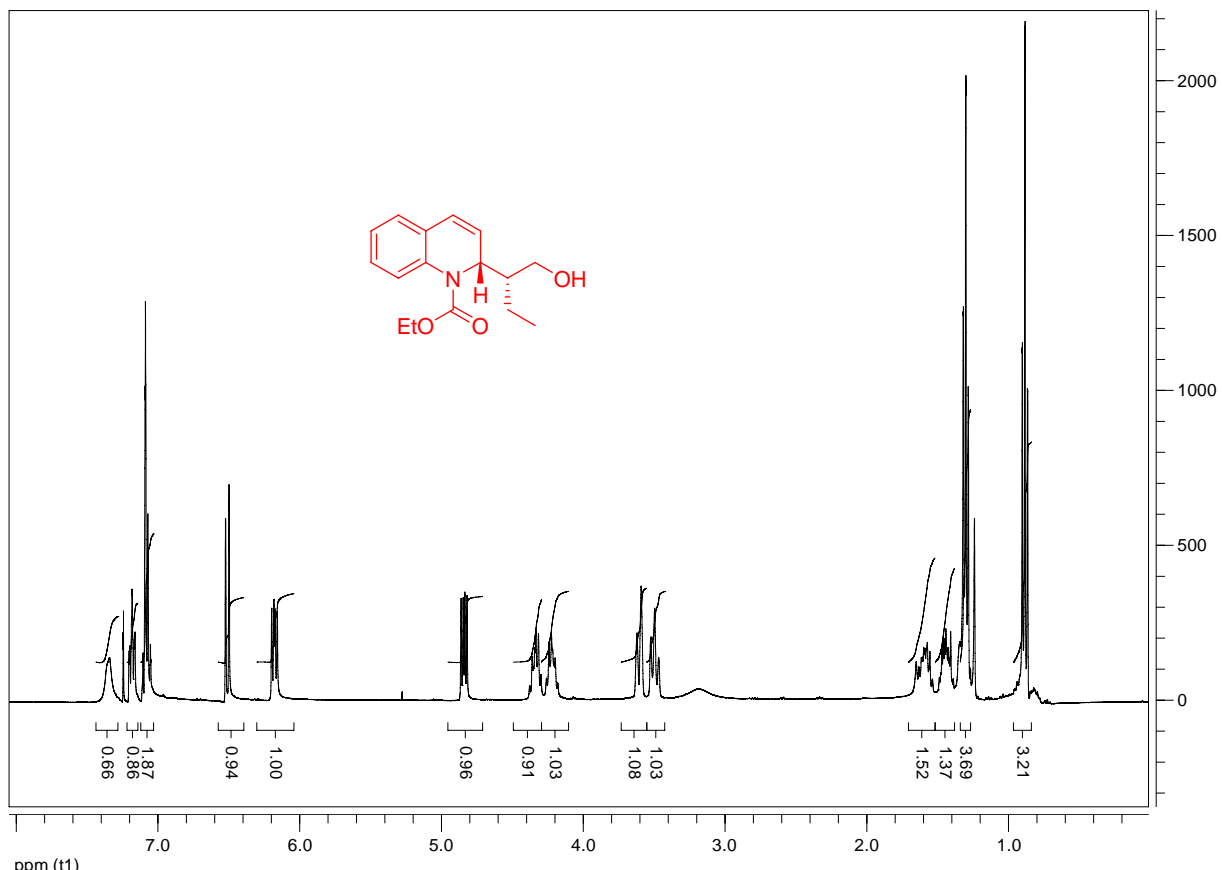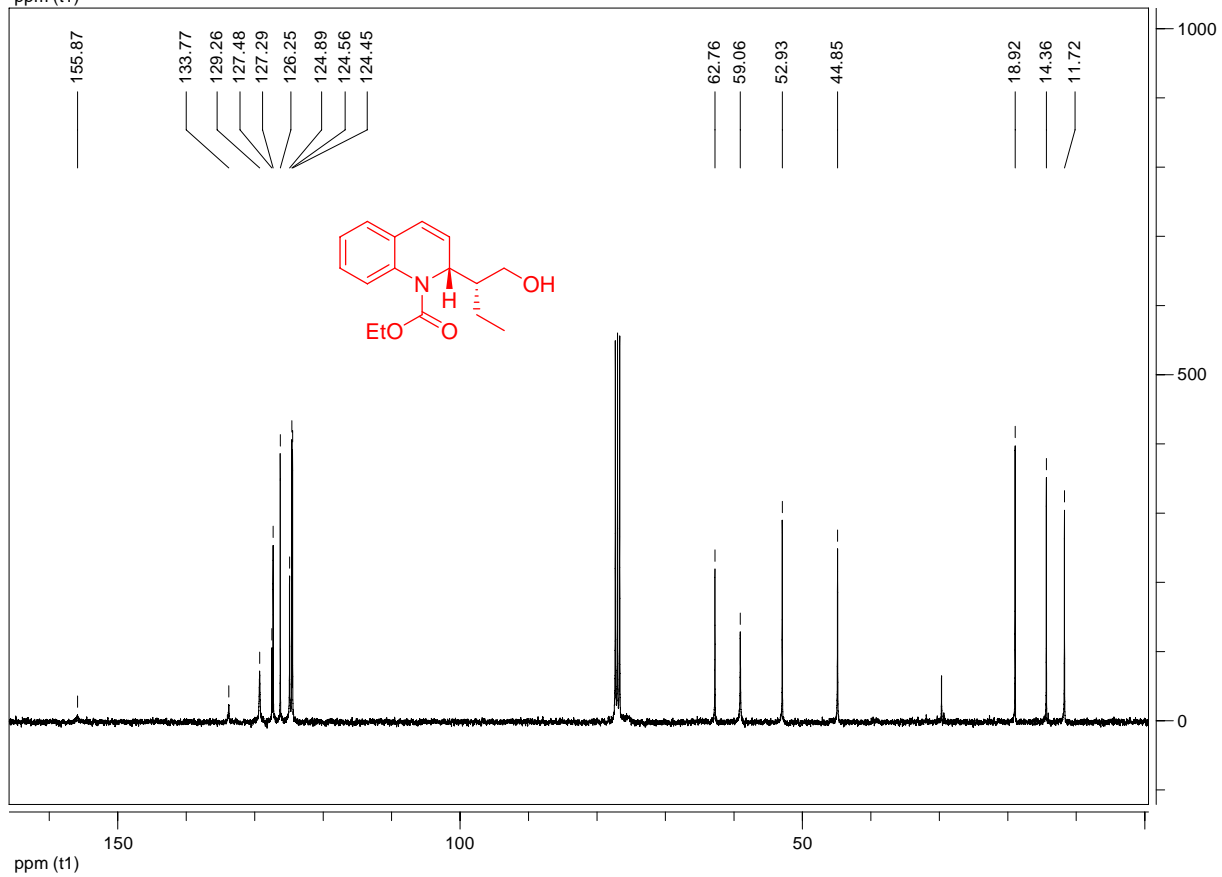

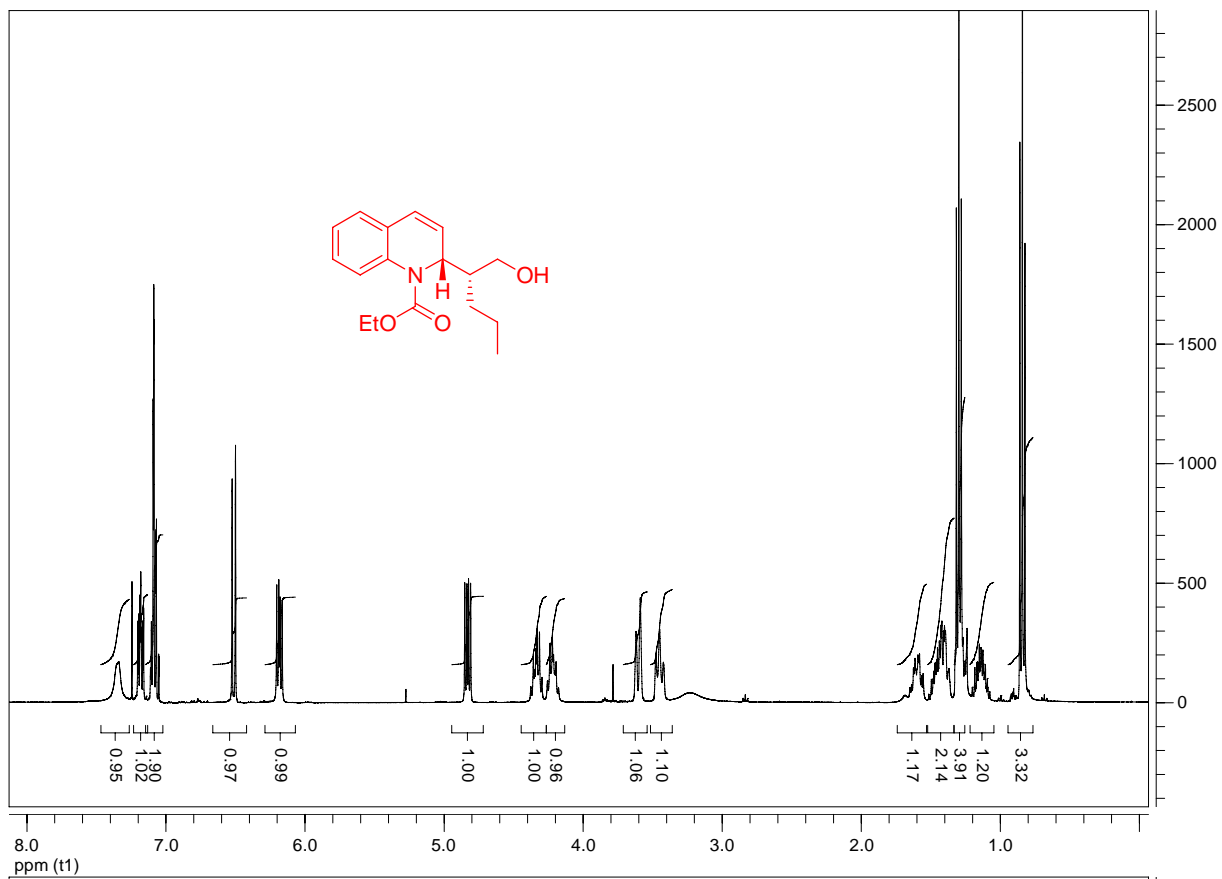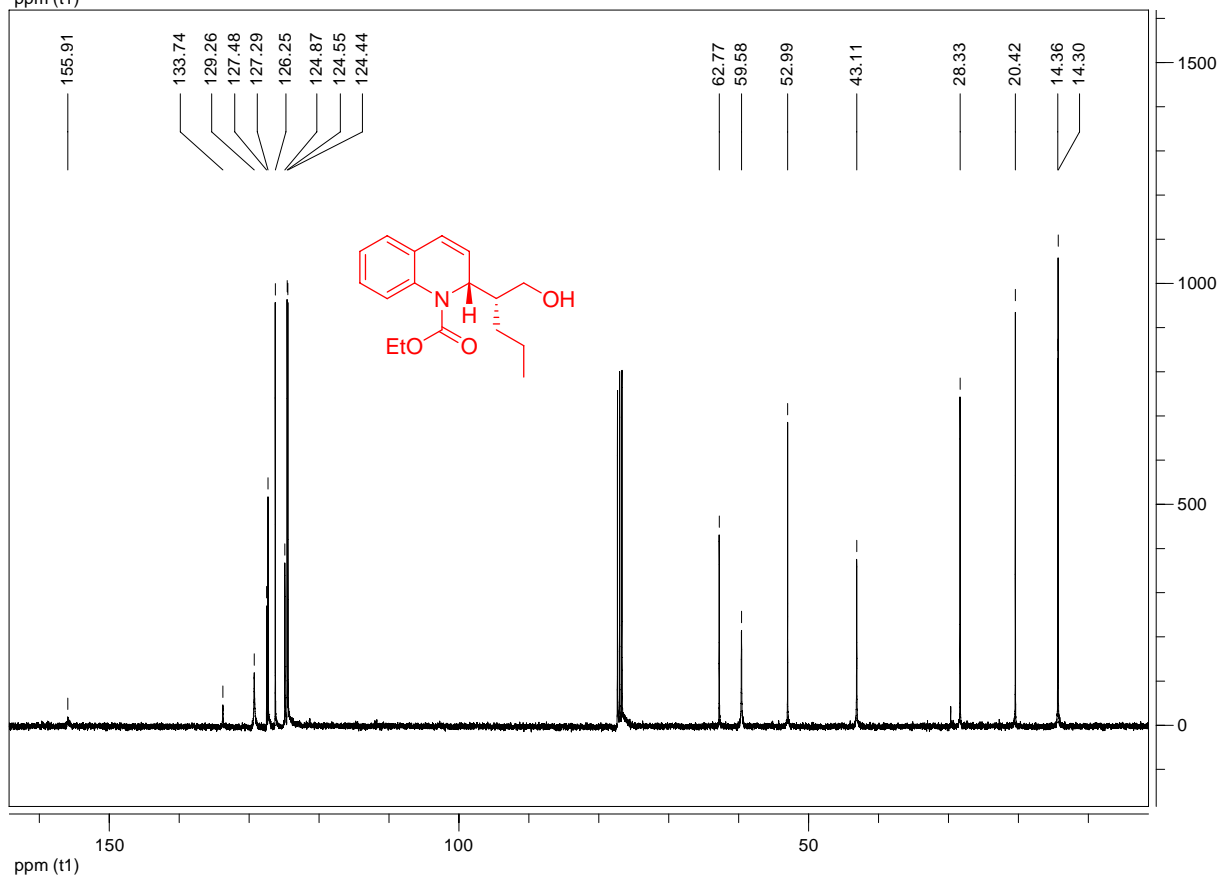



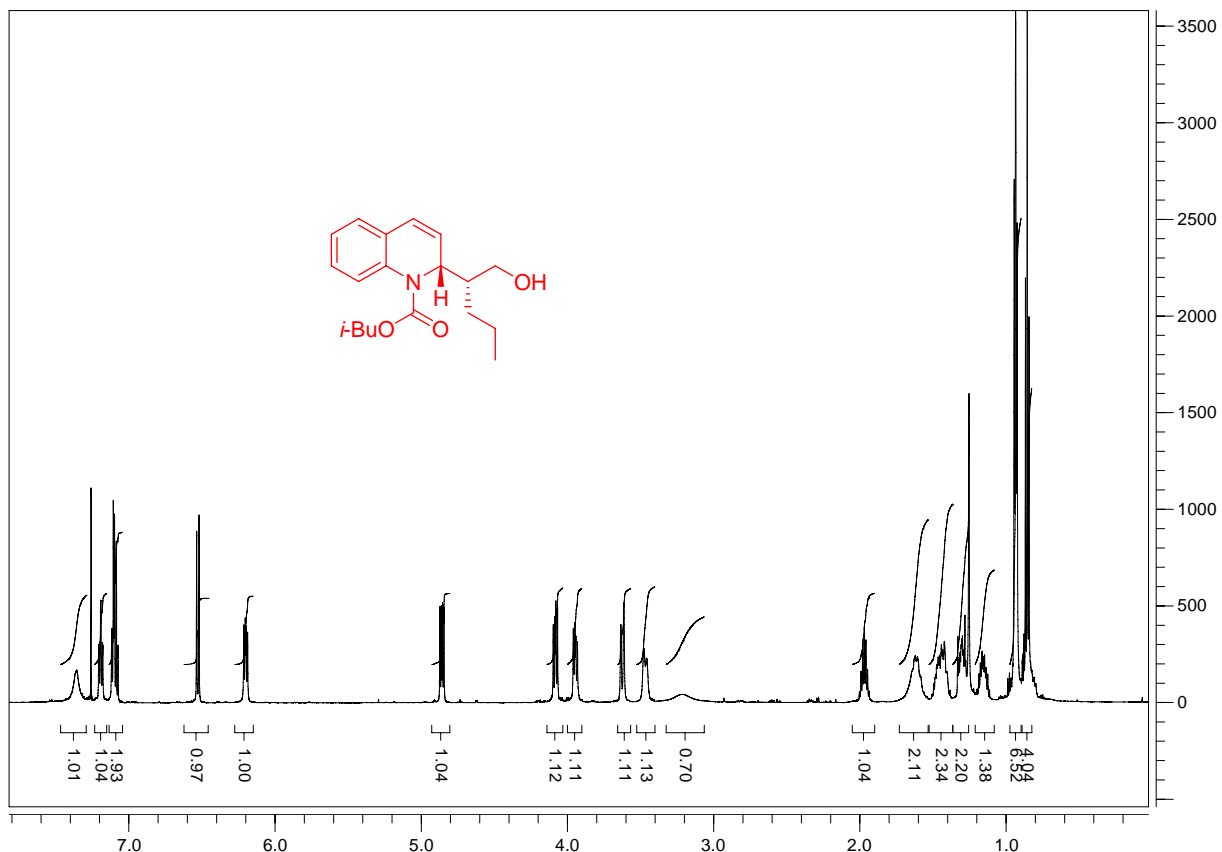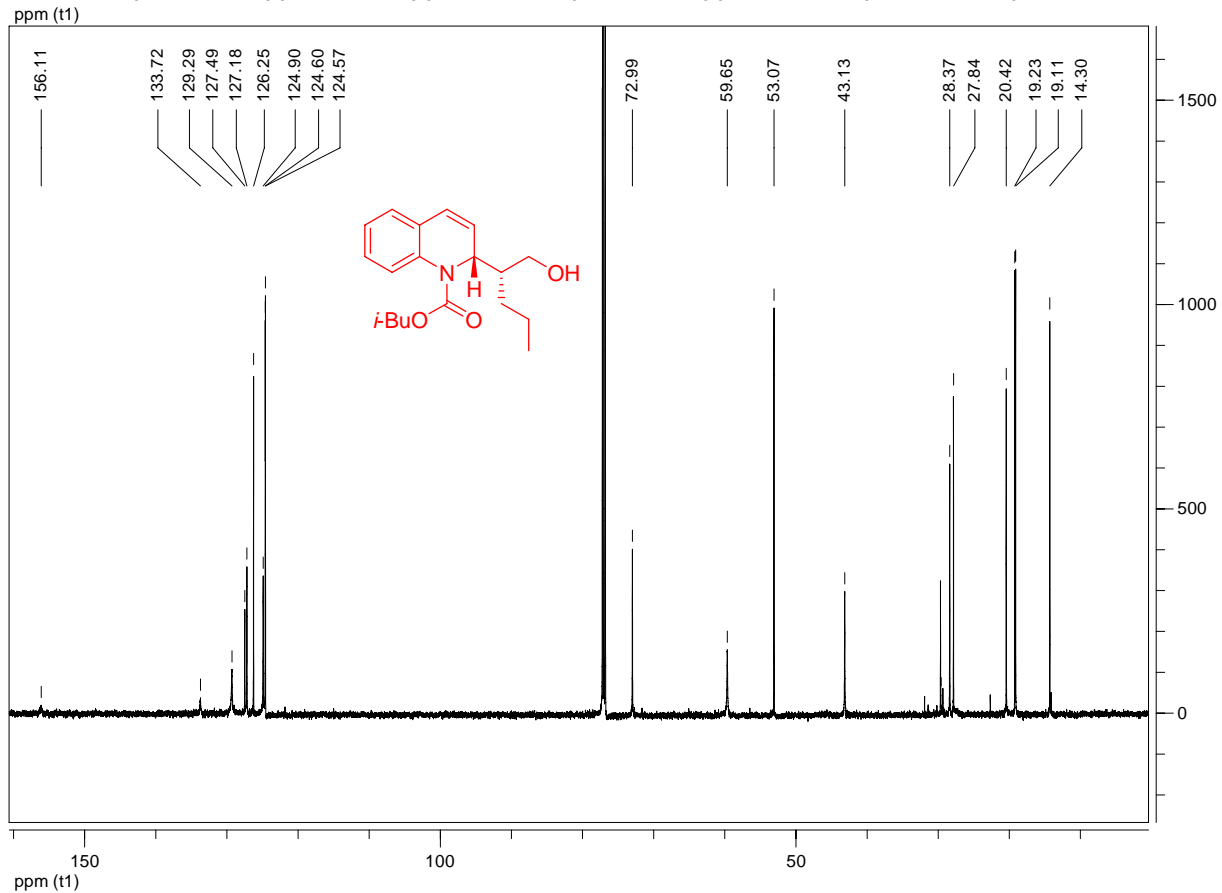

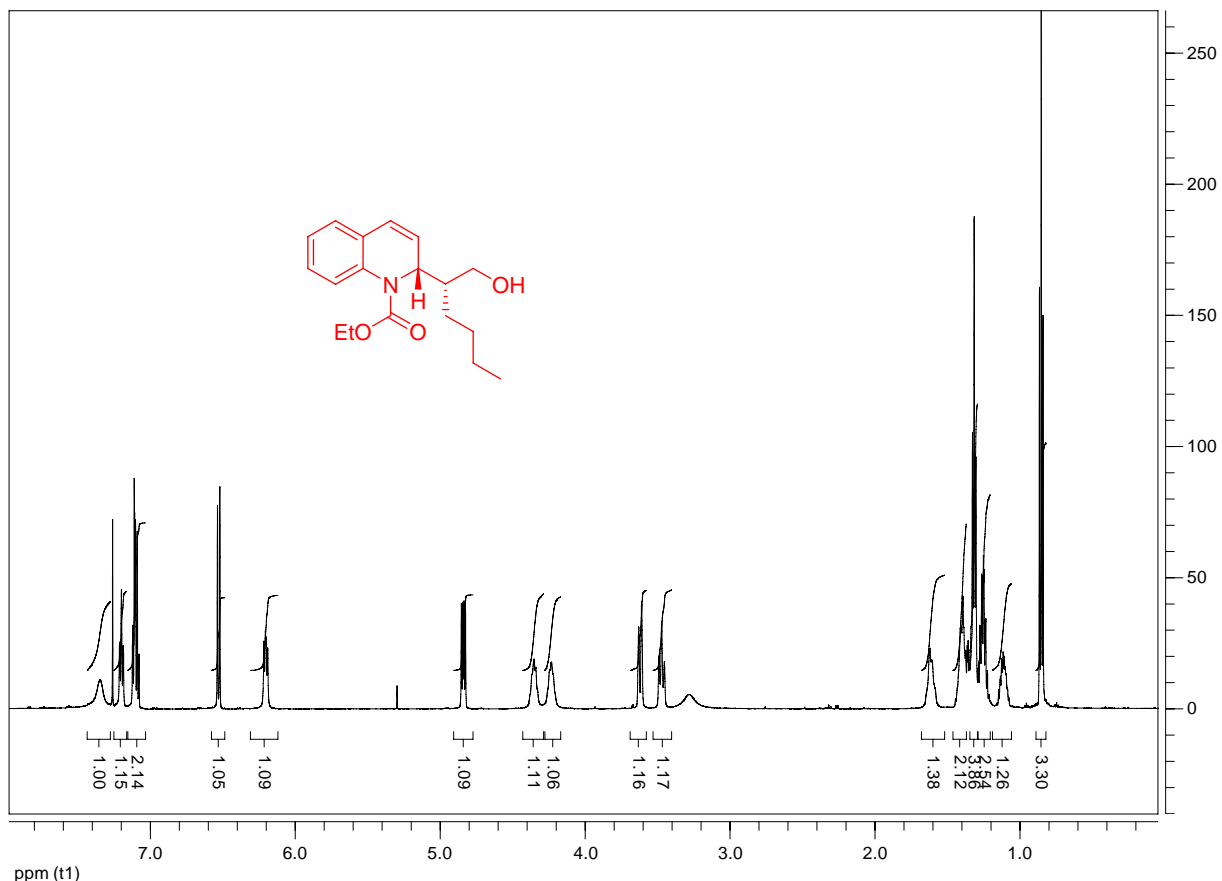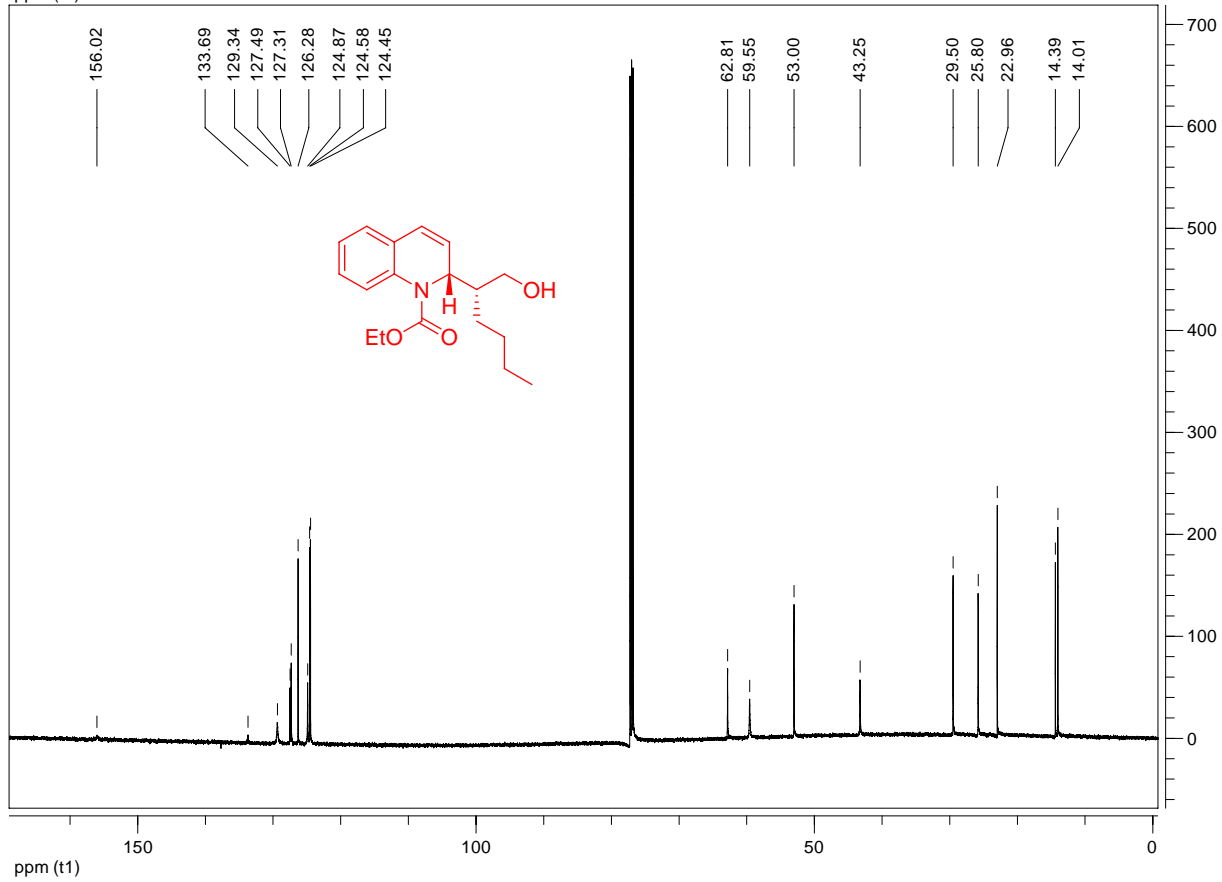

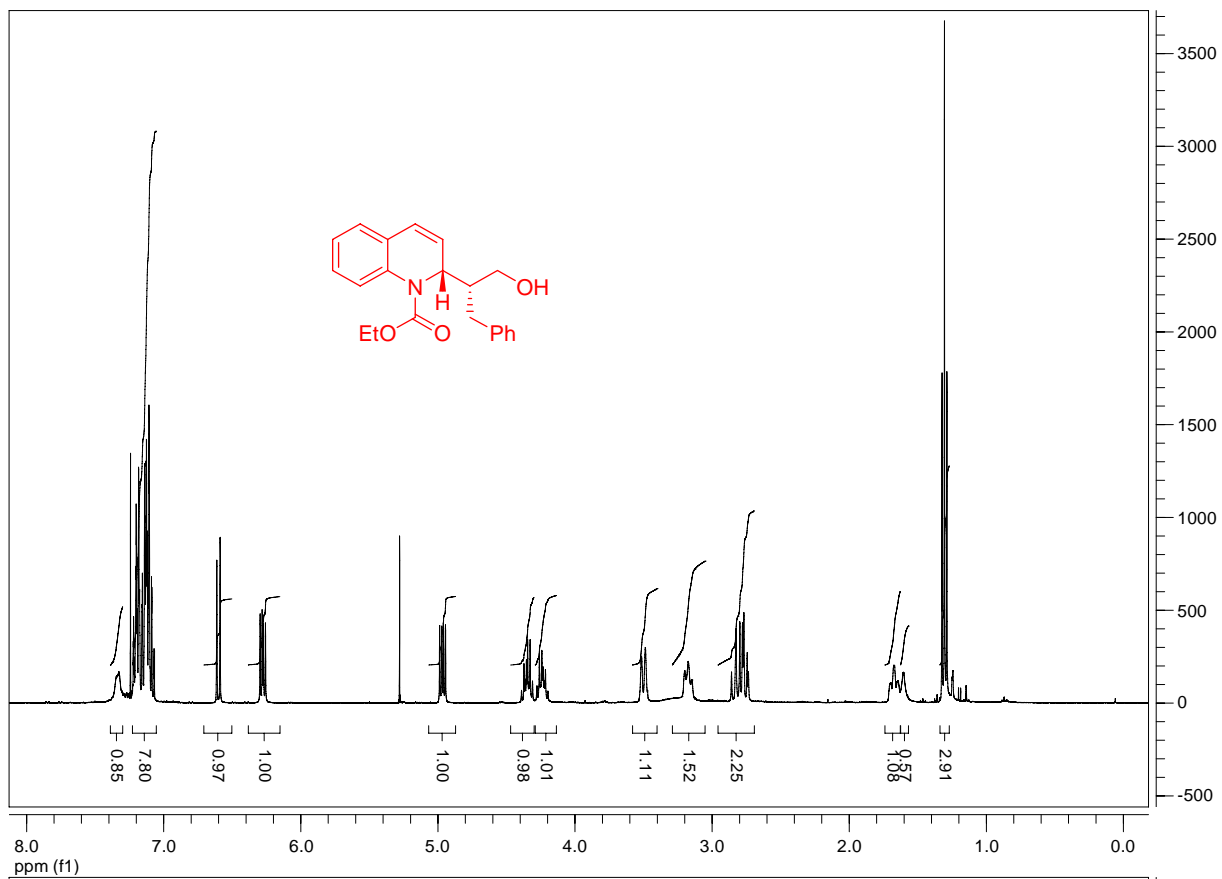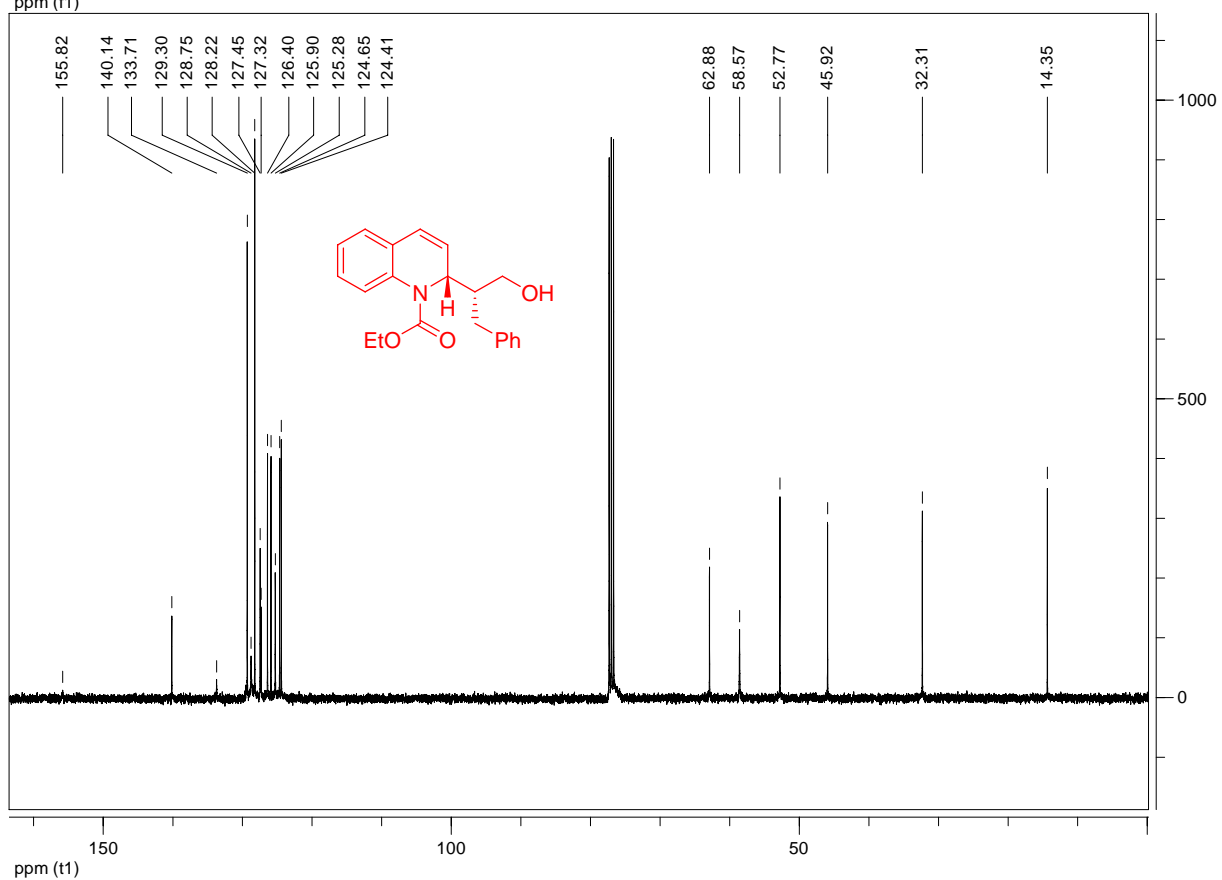

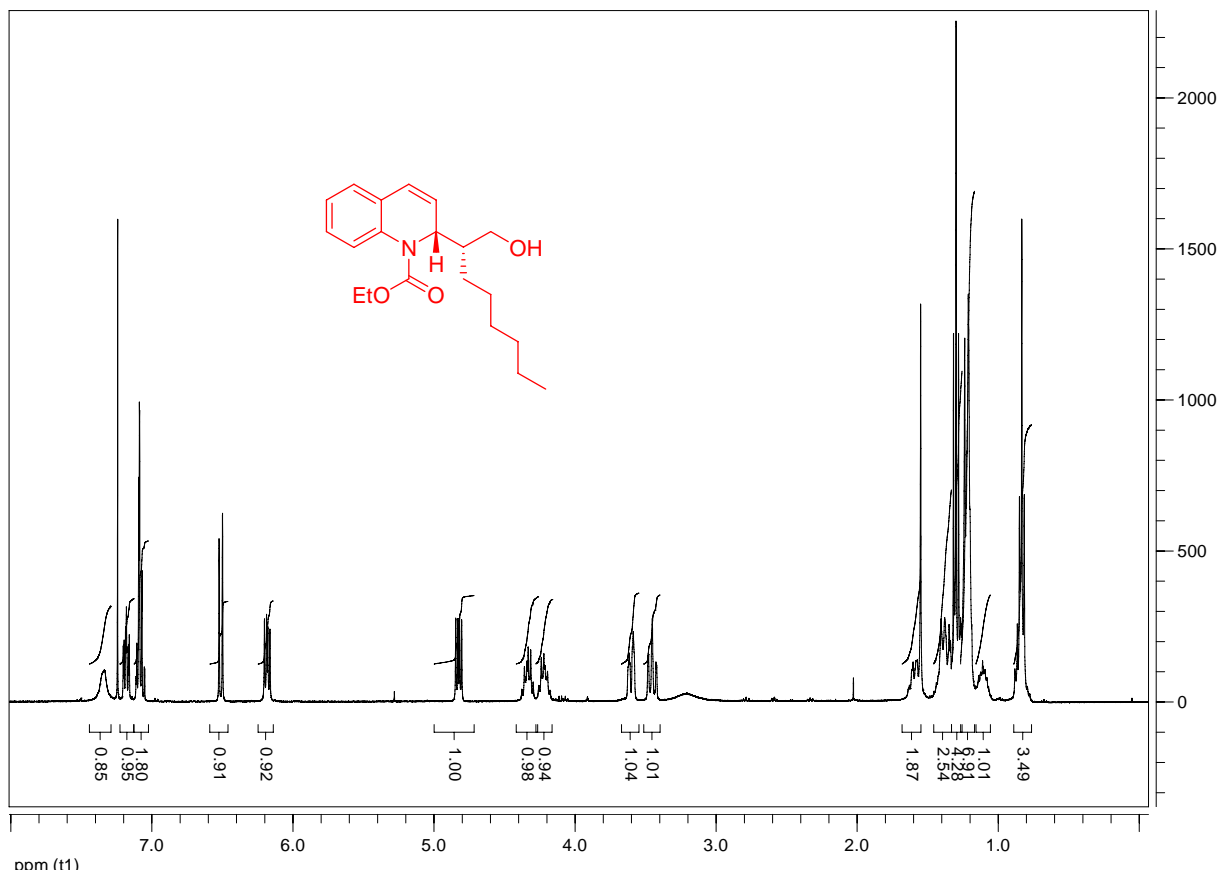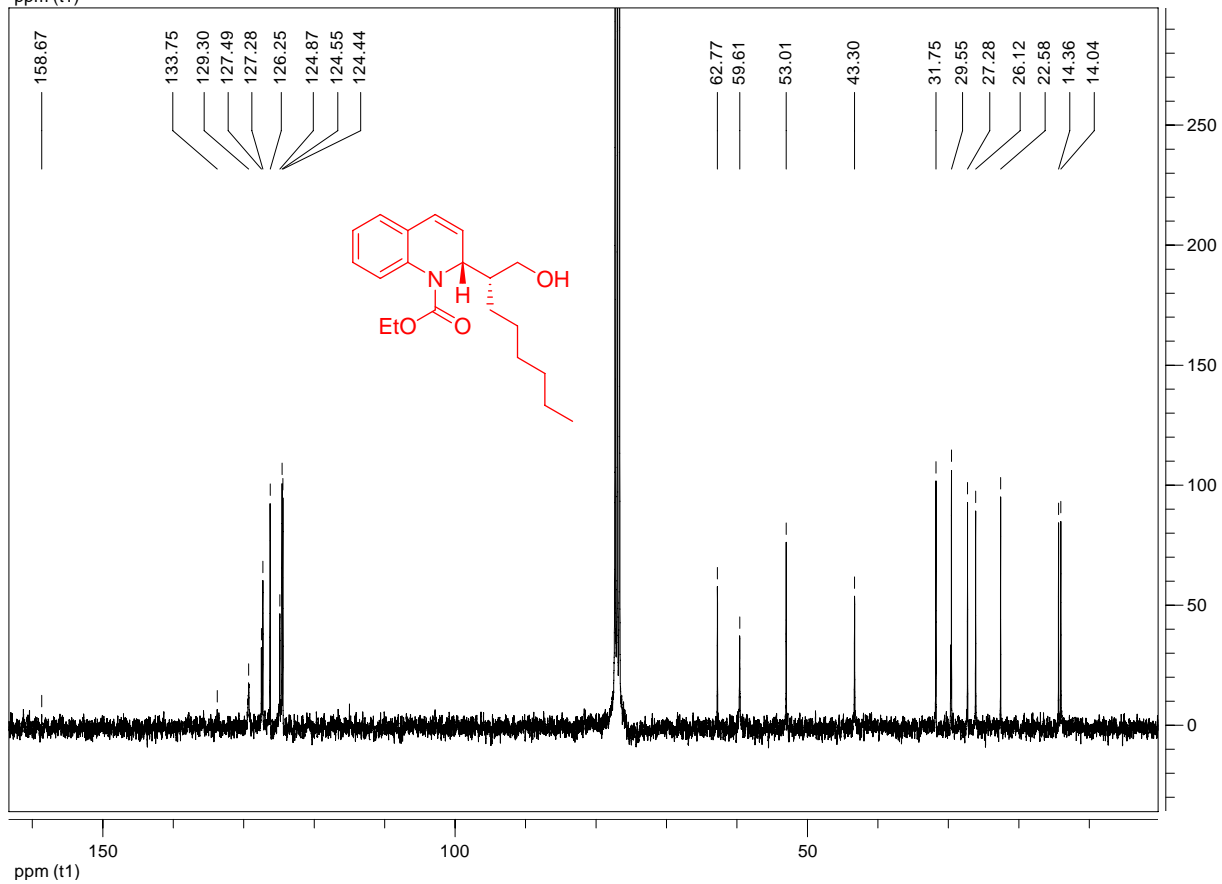

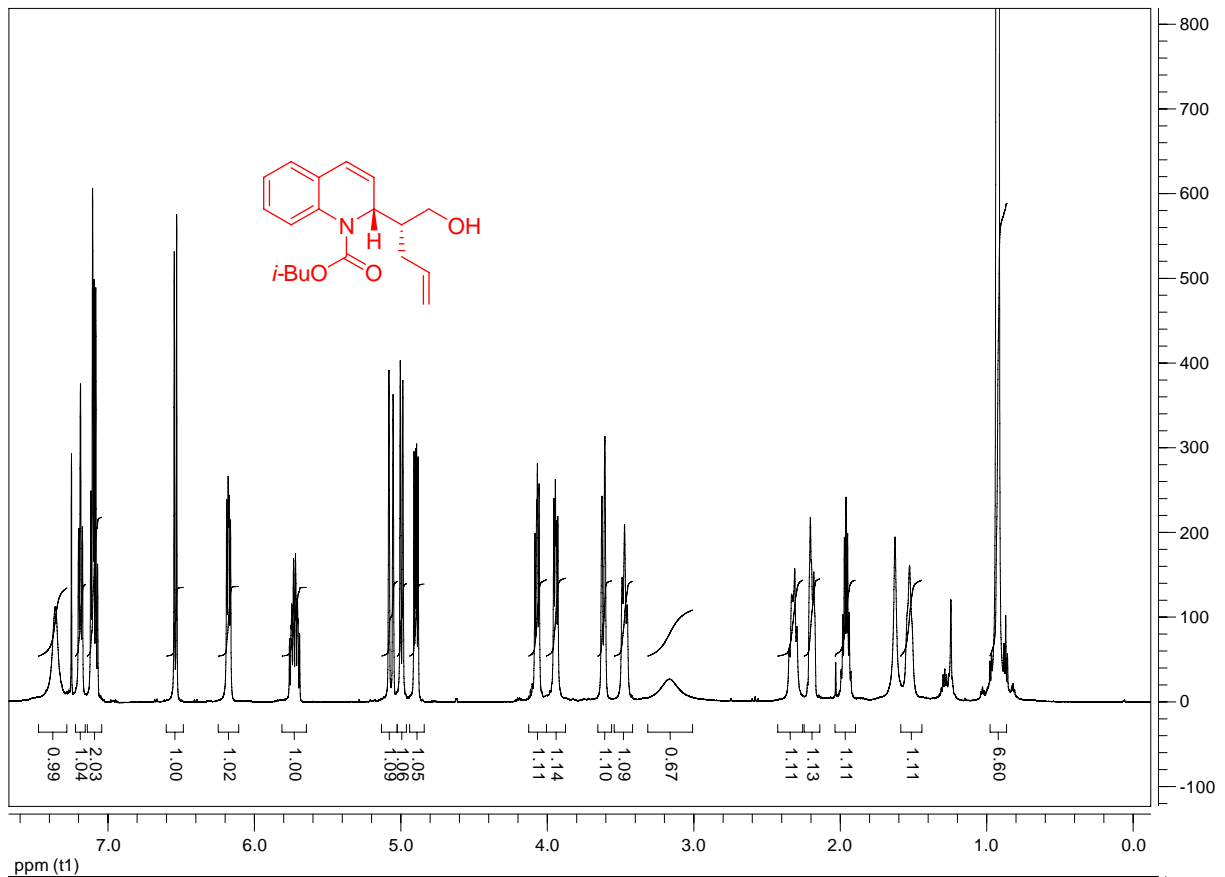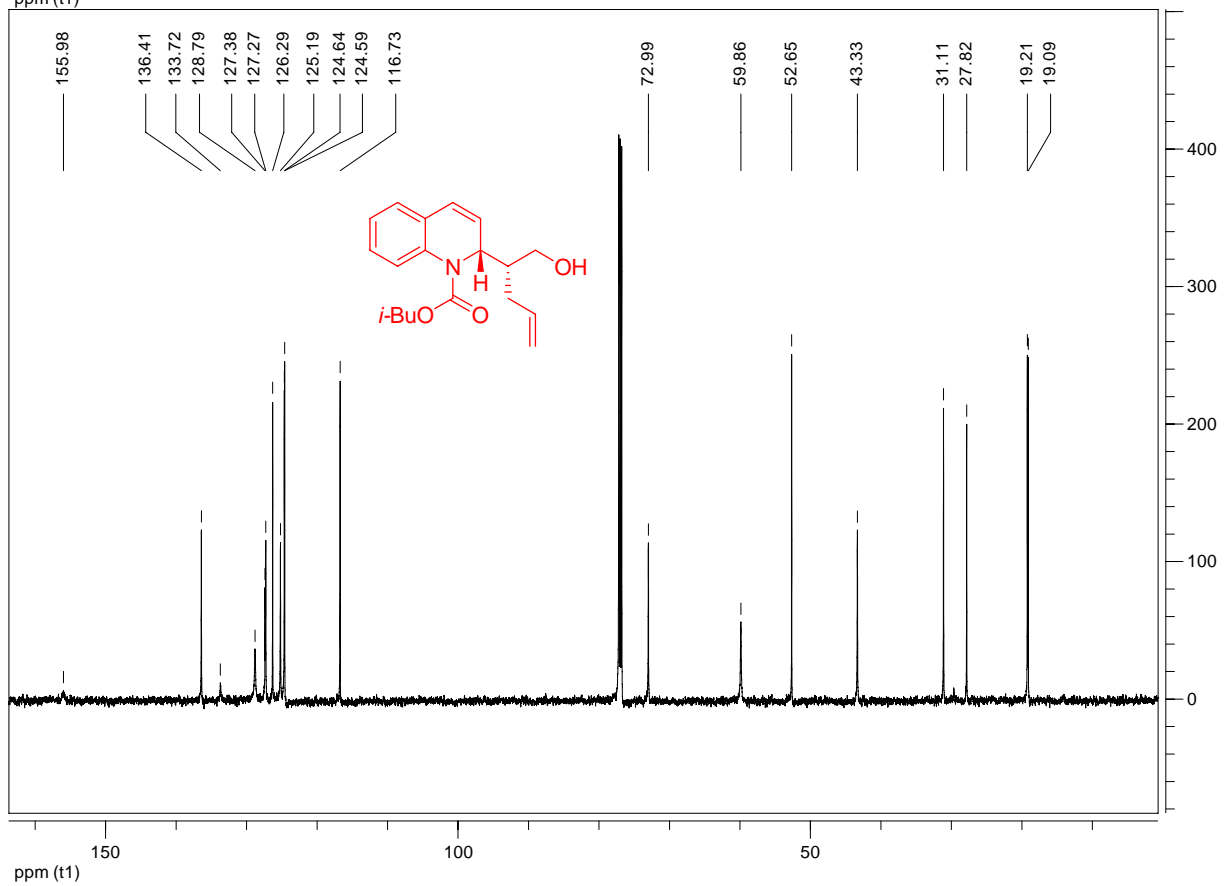

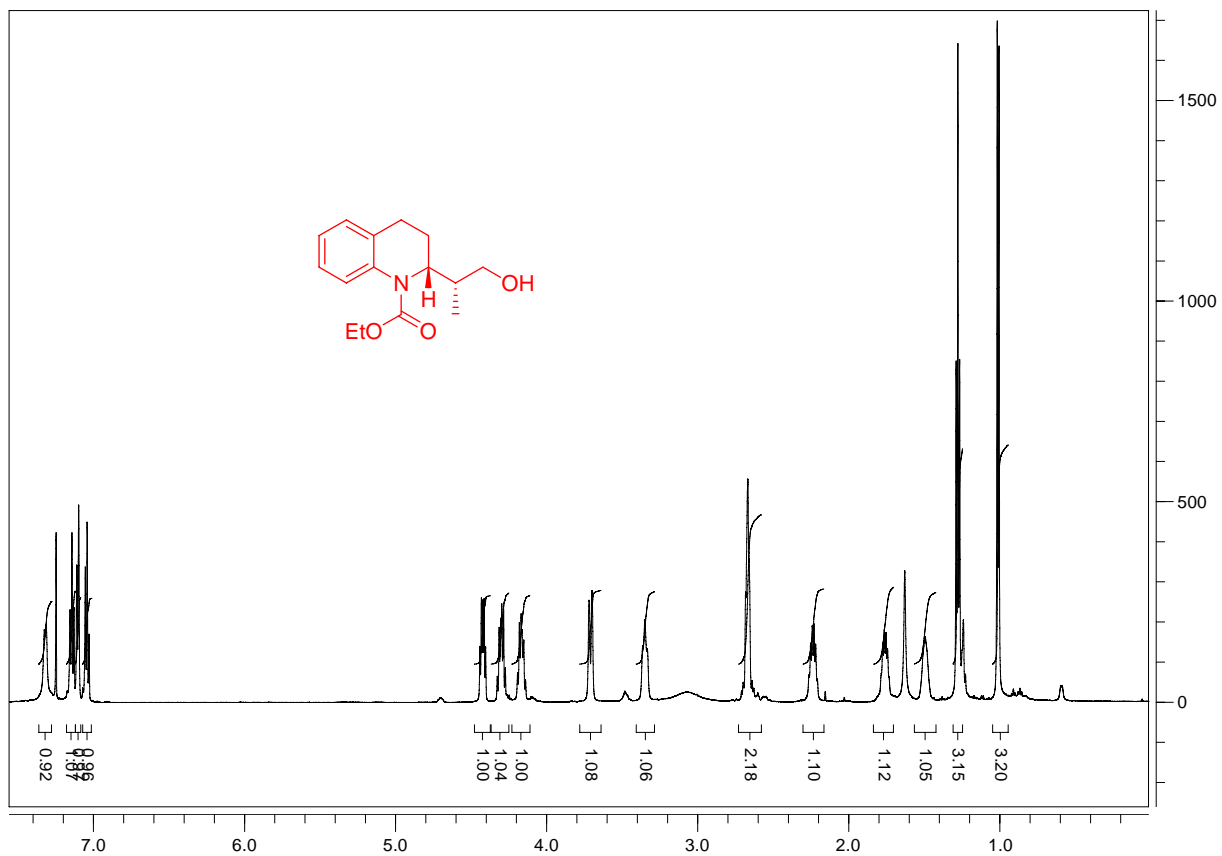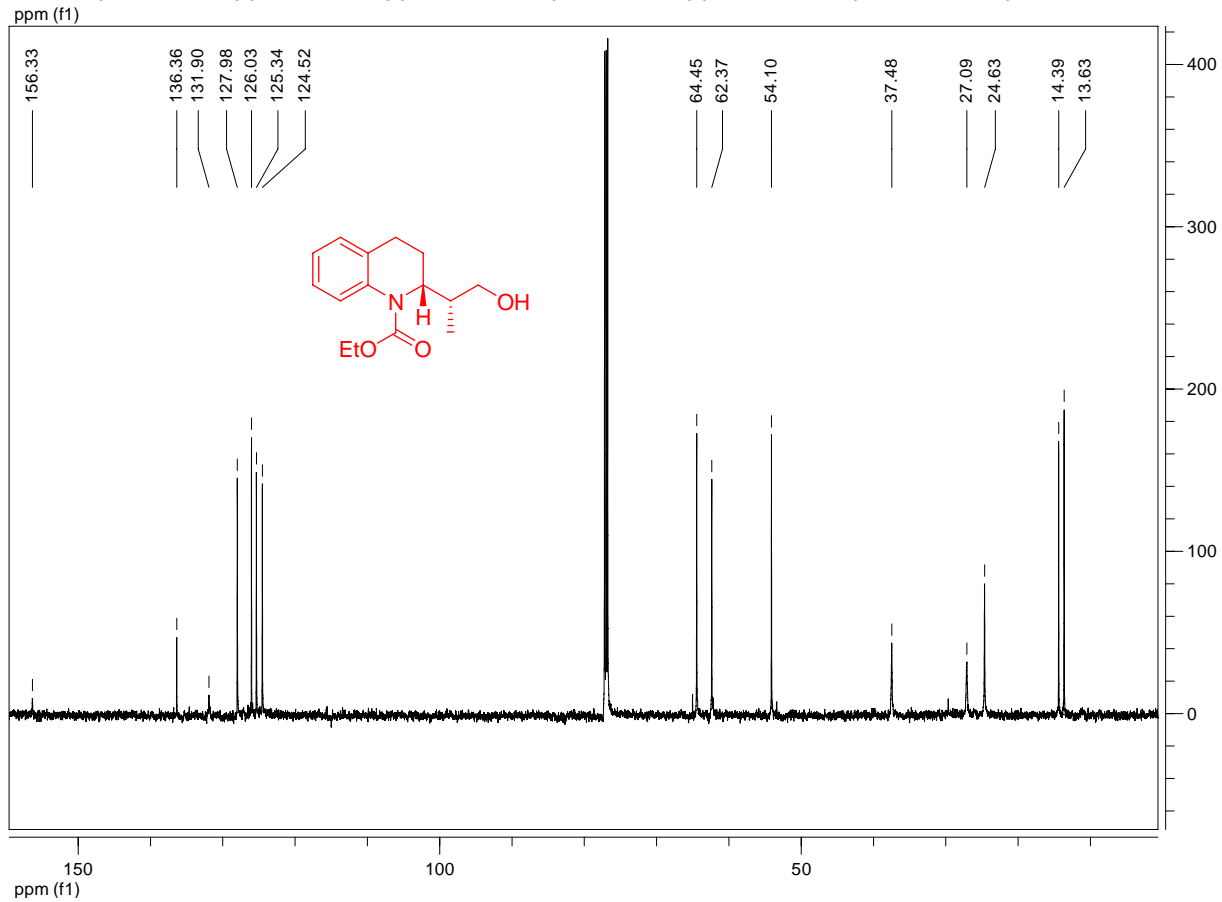

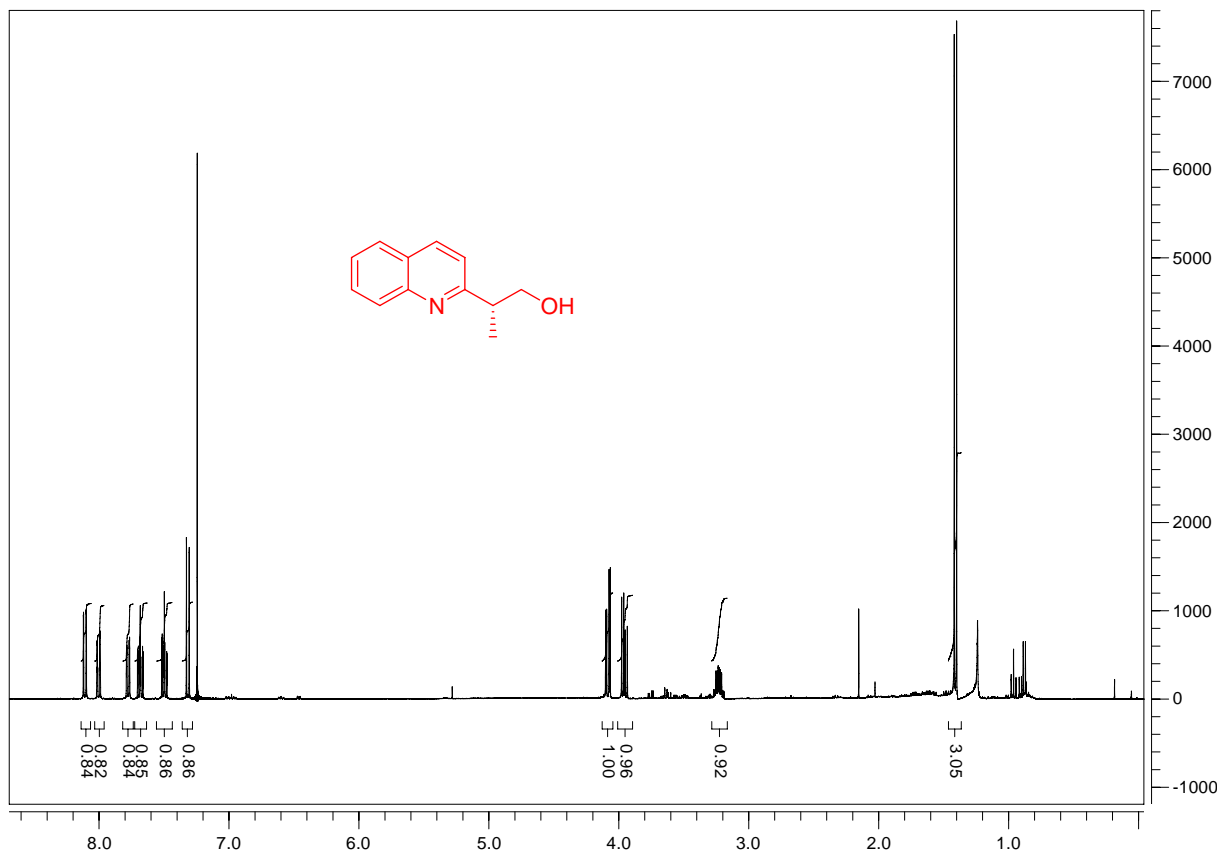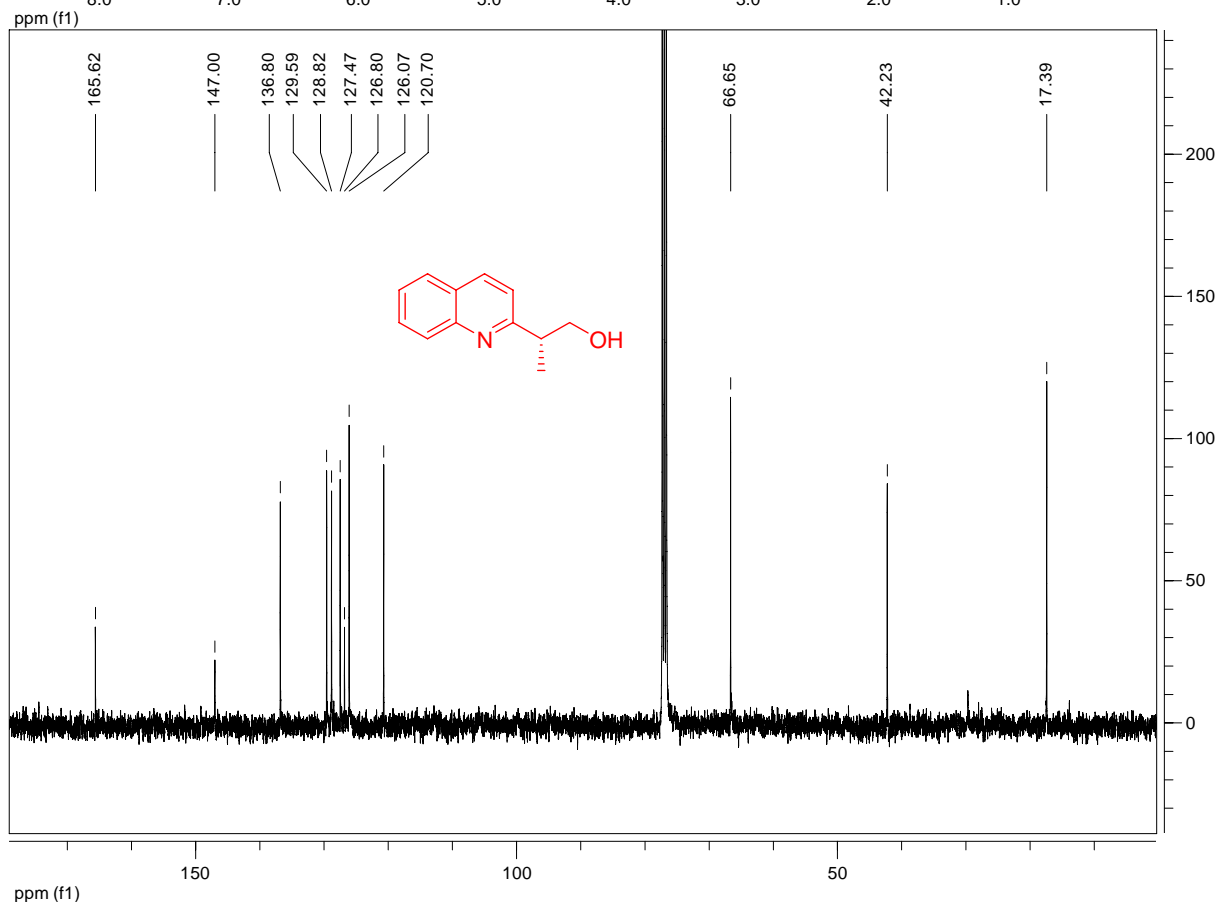

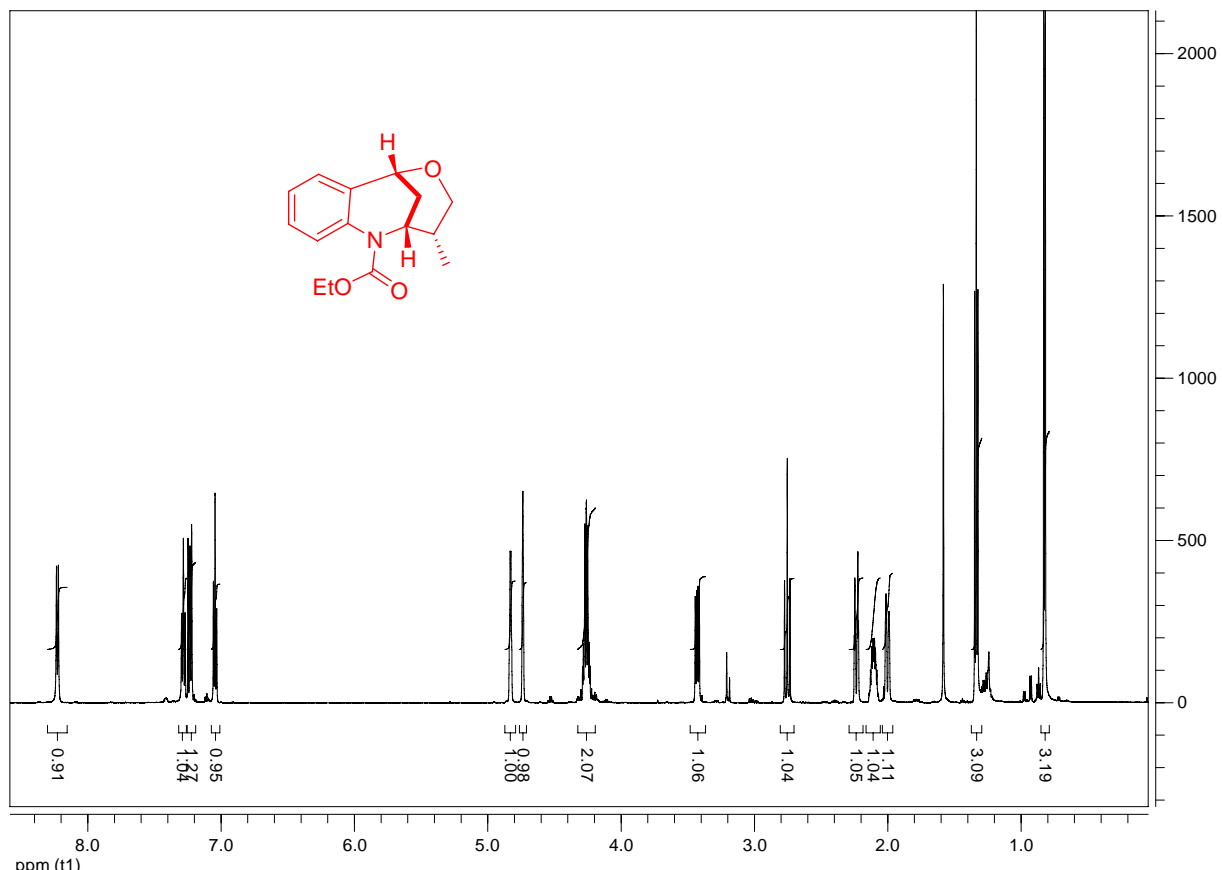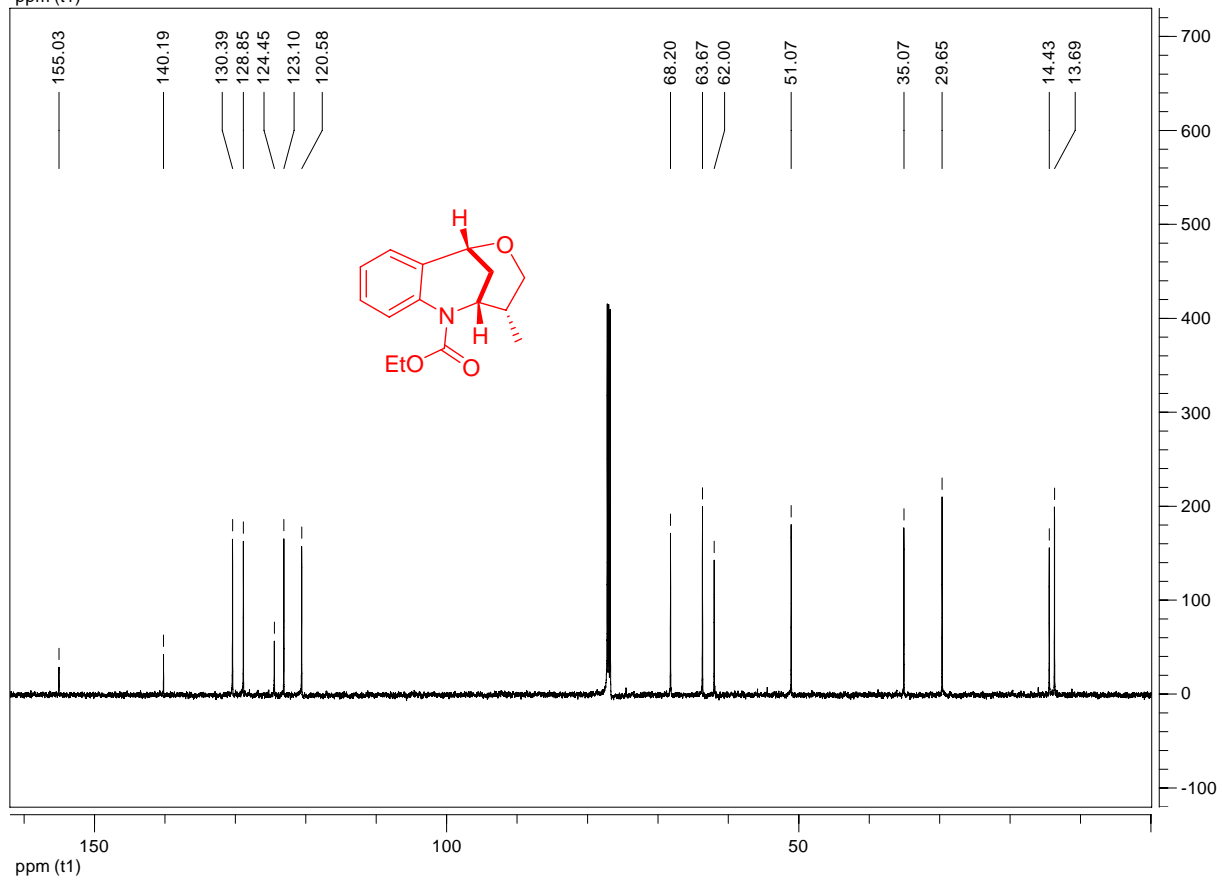



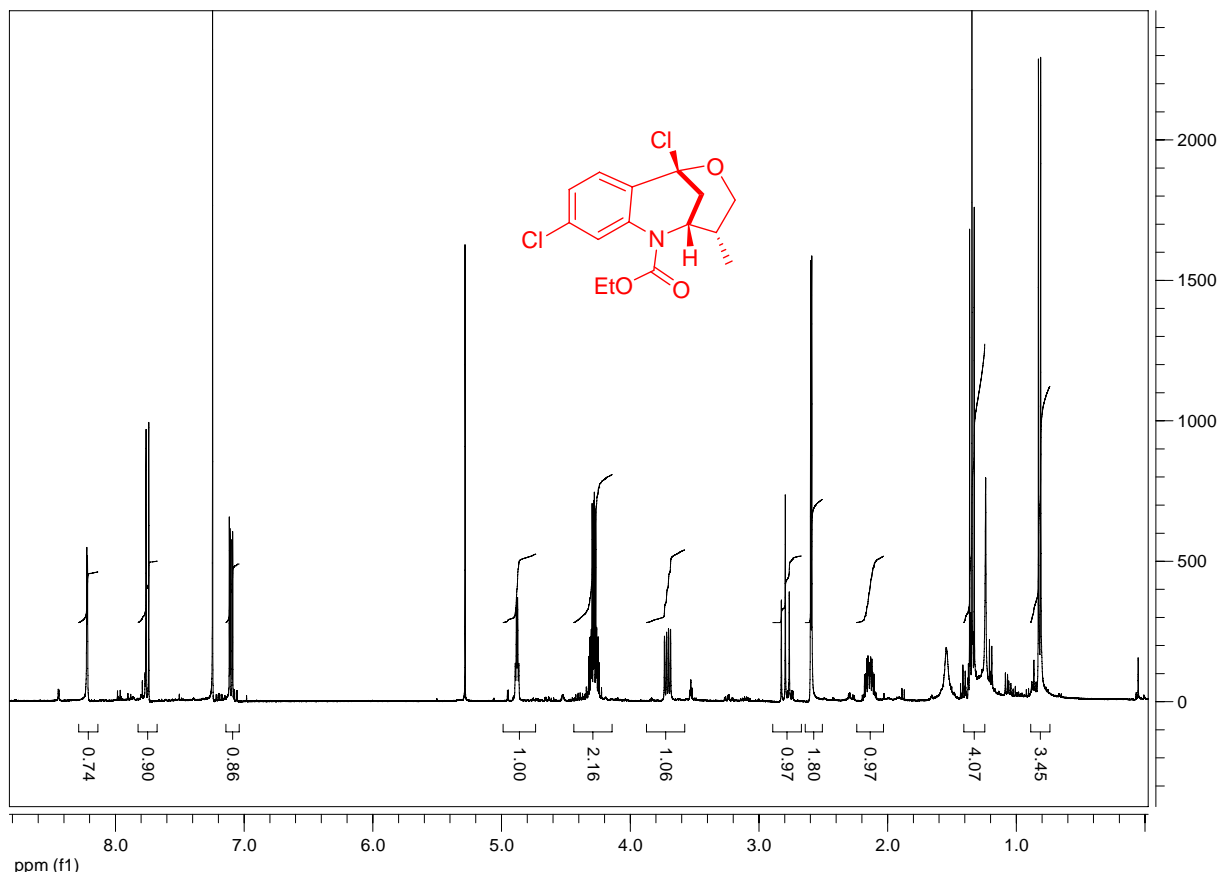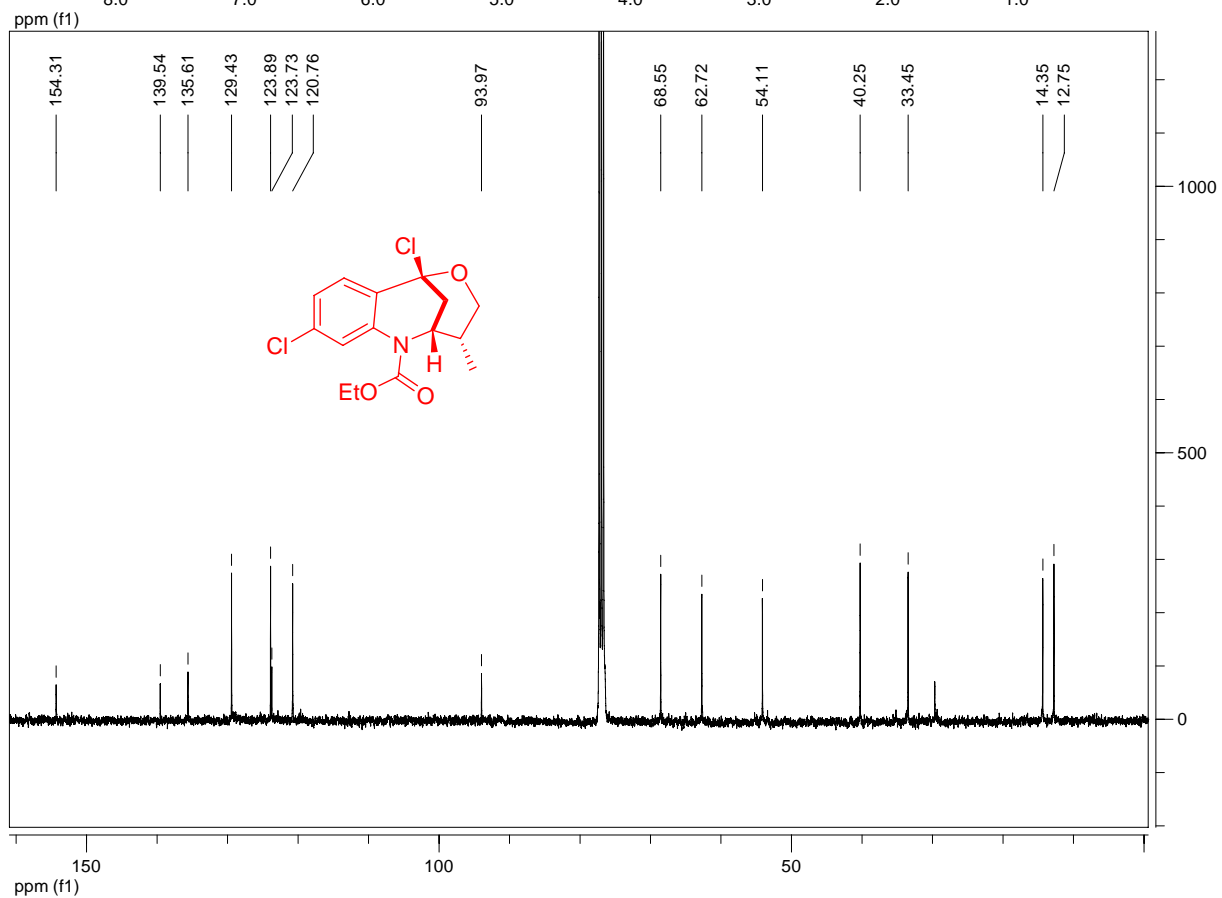

Chromatogram : CV-874p1\_ADH\_9010\_flow1\_21

Data file: CV-874p1\_ADH\_9010\_flow1\_21.DATA  
 Method: HPLC1\_ADH\_9010\_flow1\_acq\_60  
 Date: 06.01.2012 19:58:51

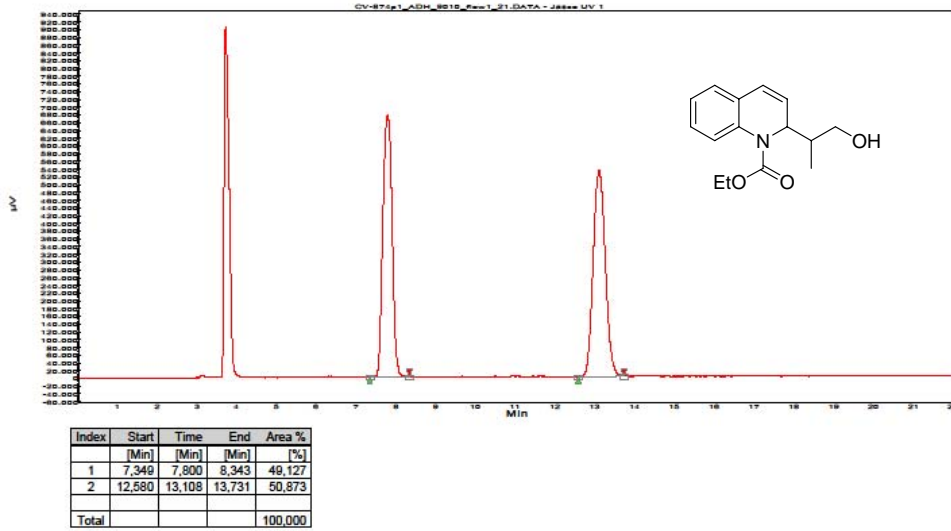

Chromatogram : CV1203p1\_ADH\_9010\_flow1\_51

Data file: CV1203p1\_ADH\_9010\_flow1\_51.DATA  
 Method: HPLC1\_ADH\_9010\_flow1\_acq\_60  
 Date: 12.09.2012 12:35:01

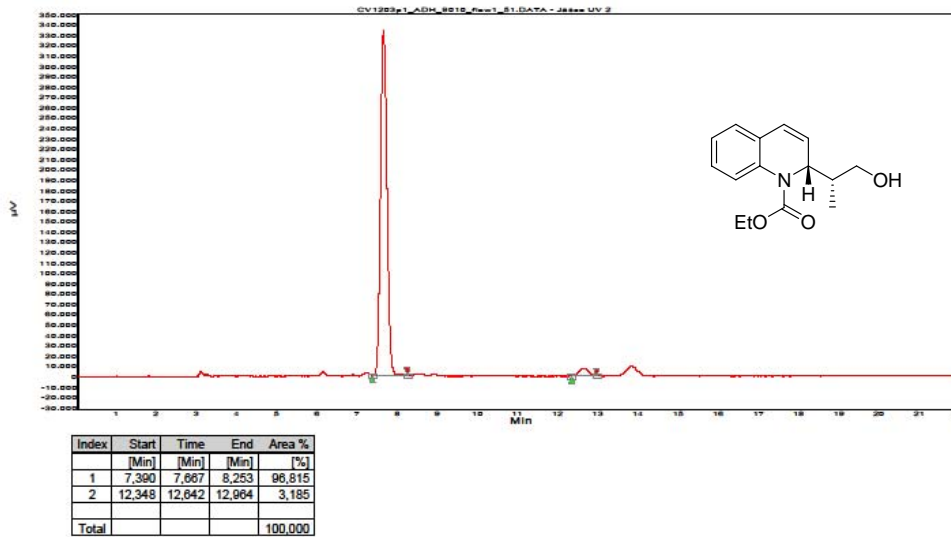

Chromatogram : CV-3-p1\_ADH\_9010\_flow1\_222

Data file: CV-3-p1\_ADH\_9010\_flow1\_222.DATA  
 Method: HPLC1\_ADH\_9010\_flow1\_acq\_40  
 Date: 24.04.2012 12:49:03

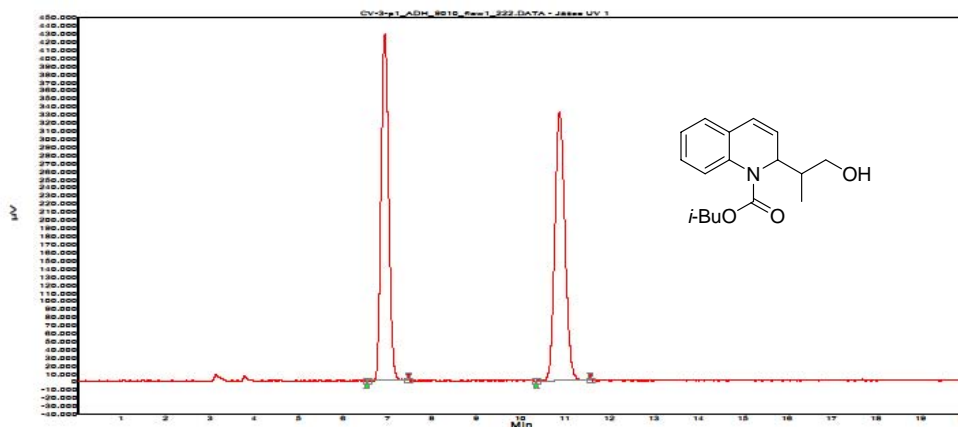

| Index | Start [Min] | Time [Min] | End [Min] | Area %  |
|-------|-------------|------------|-----------|---------|
| 1     | 6,536       | 6,642      | 7,485     | 49,102  |
| 2     | 10,351      | 10,883     | 11,567    | 50,898  |
| Total |             |            |           | 100,000 |

Chromatogram : CV-11-p1\_ADH\_9010\_flow1\_444

Data file: CV-11-p1\_ADH\_9010\_flow1\_444.DATA  
 Method: HPLC1\_ADH\_9010\_flow1\_acq\_40  
 Date: 24.04.2012 14:14:28

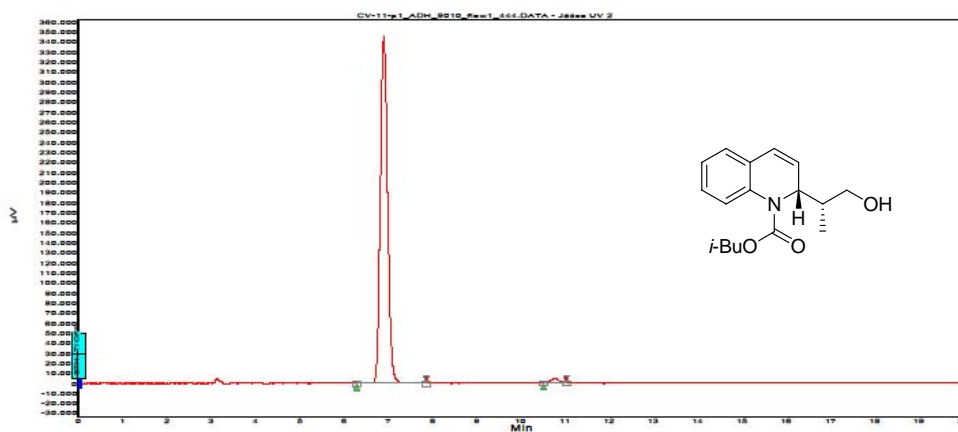

| Index | Start [Min] | Time [Min] | End [Min] | Area %  |
|-------|-------------|------------|-----------|---------|
| 1     | 6,293       | 6,908      | 7,866     | 98,551  |
| 2     | 10,516      | 10,783     | 11,034    | 1,449   |
| Total |             |            |           | 100,000 |

Chromatogram : CV-919-p1\_ADH\_9010\_flow1\_51

Data file: CV-919-p1\_ADH\_9010\_flow1\_51.D\\DATA  
 Method: HPLC1\_ADH\_9010\_flow1\_acq\_30  
 Date: 06.01.2012 20:59:17

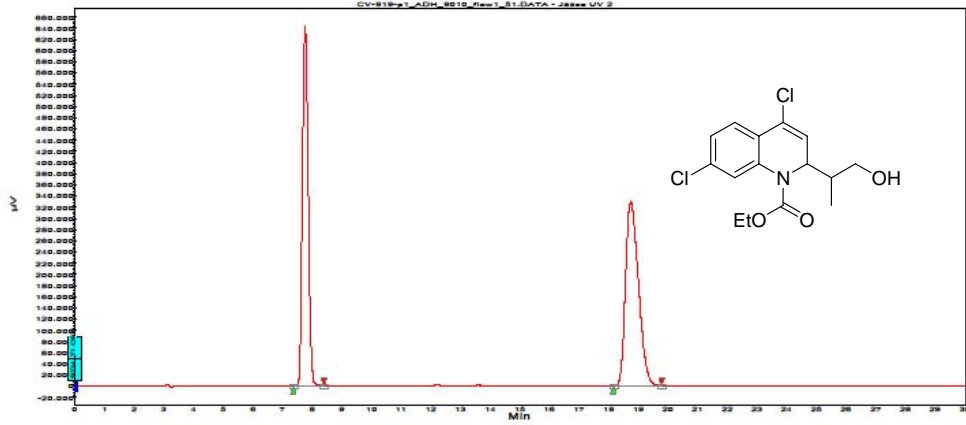

| Index | Start [Min] | Time [Min] | End [Min] | Area %  |
|-------|-------------|------------|-----------|---------|
| 1     | 7.376       | 7.775      | 8.398     | 46,561  |
| 2     | 18,161      | 18,733     | 19,773    | 53,439  |
| Total |             |            |           | 100,000 |

Chromatogram : CV-916p1\_ADH\_9010\_flow1\_71

Data file: CV-916p1\_ADH\_9010\_flow1\_71.D\\DATA  
 Method: HPLC1\_ADH\_9010\_flow1\_acq\_30  
 Date: 06.01.2012 22:04:43

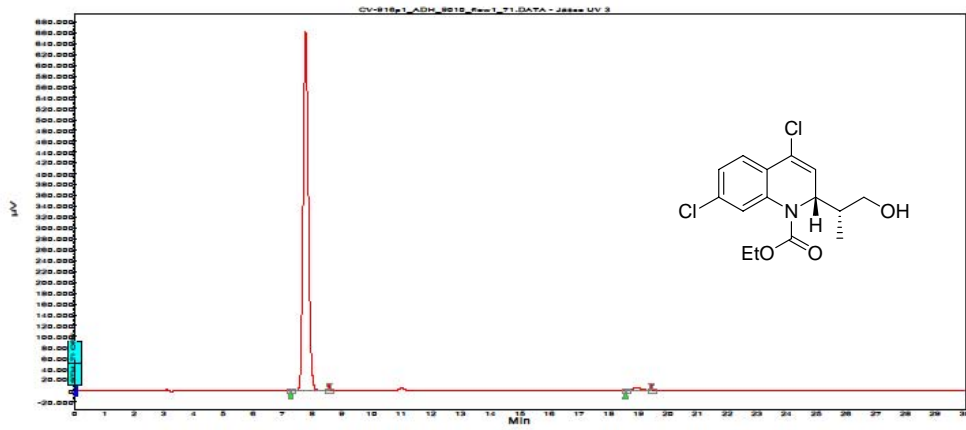

| Index | Start [Min] | Time [Min] | End [Min] | Area %  |
|-------|-------------|------------|-----------|---------|
| 1     | 7,283       | 7,783      | 8,585     | 98,344  |
| 2     | 18,564      | 18,907     | 19,432    | 1,656   |
| Total |             |            |           | 100,000 |

**Chromatogram : CV-920p2\_ADH\_9010\_flow1\_345**

Data file: CV-920p2\_ADH\_9010\_flow1\_345.DATA  
 Method: HPLC1\_ADH\_9010\_flow1\_acq\_60  
 Date: 11.01.2012 20:56:36

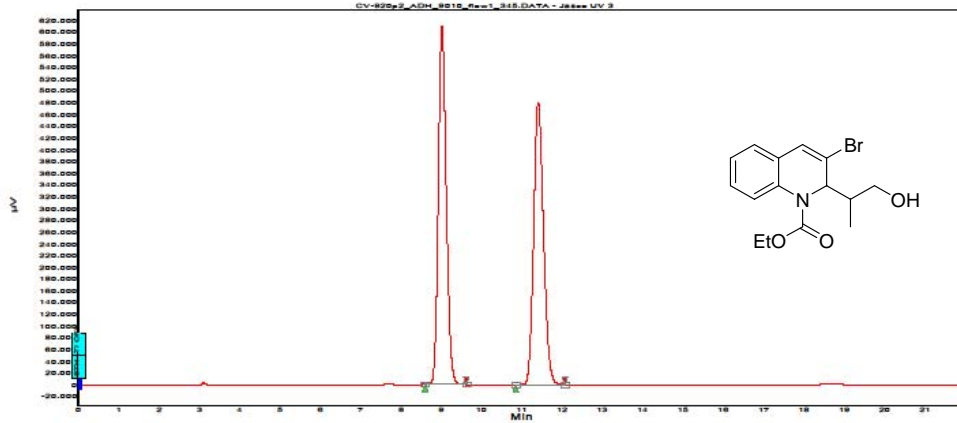

| Index | Name    | Start Time [Min] | Time [Min] | End Time [Min] | Ret. time Offset [Min] | Quantity [% Area] | Height [µV] | Area [µV.Min] | Area % [%] |
|-------|---------|------------------|------------|----------------|------------------------|-------------------|-------------|---------------|------------|
| 1     | UNKNOWN | 8,601            | 9,025      | 9,623          | 0,000                  | 50,61             | 608362,2    | 138781,2      | 50,613     |
| 2     | UNKNOWN | 10,845           | 11,408     | 12,067         | 0,000                  | 49,39             | 480330,4    | 135419,4      | 49,387     |
| Total |         |                  |            |                |                        | 100,00            | 1088692,6   | 274200,6      | 100,000    |

**Chromatogram : CV-917p2\_ADH\_9010\_flow1\_890**

Data file: CV-917p2\_ADH\_9010\_flow1\_890.DATA  
 Method: HPLC1\_ADH\_9010\_flow1\_acq\_30  
 Date: 11.01.2012 22:28:56

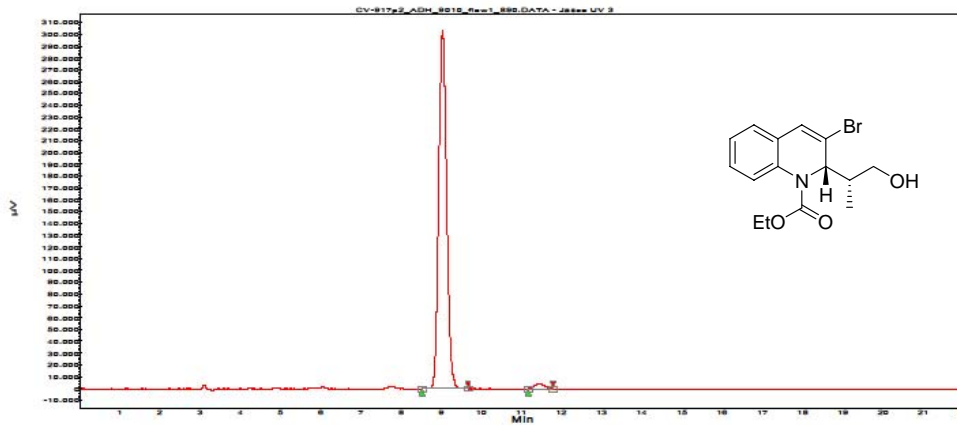

| Index | Start [Min] | Time [Min] | End [Min] | Area % [%] |
|-------|-------------|------------|-----------|------------|
| 1     | 8,533       | 9,033      | 9,989     | 98,335     |
| 2     | 11,189      | 11,450     | 11,783    | 1,665      |
| Total |             |            |           | 100,000    |

**Chromatogram : CV999-p2\_ADH\_9010\_flow1\_6661**

Data file: CV999-p2\_ADH\_9010\_flow1\_6661.DATA  
 Method: HPLC1\_ADH\_9010\_flow1\_acq\_40  
 Date: 09.05.2012 21:34:17

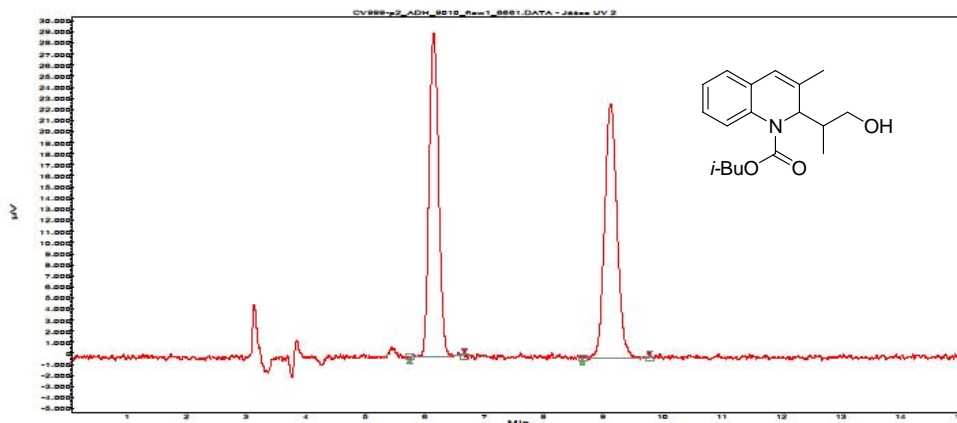

| Index | Start Time [Min] | End Time [Min] | Area [%] |
|-------|------------------|----------------|----------|
| 1     | 5,754            | 6,158          | 49,398   |
| 2     | 8,652            | 9,125          | 50,604   |
| Total |                  |                | 100,000  |

**Chromatogram : CV1002-p2-ADH\_9010\_flow1\_acq205123**

Data file: CV1002-p2-ADH\_9010\_flow1\_acq205123.DATA  
 Method: HPLC2\_ADH\_9010\_flow1\_acq20  
 Date: 11.05.2012 12:33:23

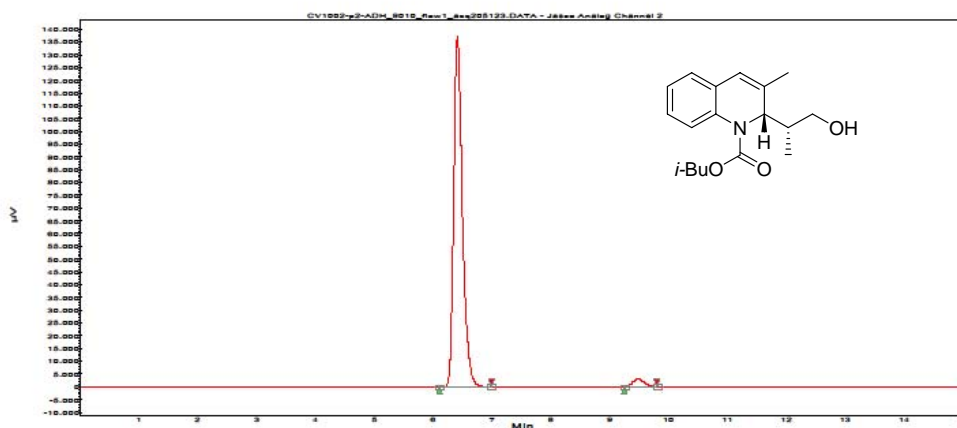

| Index | Name    | Start Time [Min] | Time [Min] | End Time [Min] | Ret. time Offset [Min] | Quantity [% Area] | Height [µV] | Area [µV.Min] | Area [%] |
|-------|---------|------------------|------------|----------------|------------------------|-------------------|-------------|---------------|----------|
| 1     | UNKNOWN | 6,112            | 6,417      | 6,996          | 0,000                  | 97,06             | 137418,1    | 23439,6       | 97,060   |
| 2     | UNKNOWN | 9,245            | 9,475      | 9,803          | 0,000                  | 2,94              | 3072,5      | 710,0         | 2,940    |
| Total |         |                  |            |                |                        | 100,00            | 140490,6    | 24149,6       | 100,000  |

**Chromatogram : EF193\_P1\_ADH\_9010\_flow1\_2**

Data file: EF193\_P1\_ADH\_9010\_flow1\_2\_DATA  
 Method: HPLC1\_ADH\_9010\_flow1\_acq\_60  
 Date: 27.01.2012 16:19:01

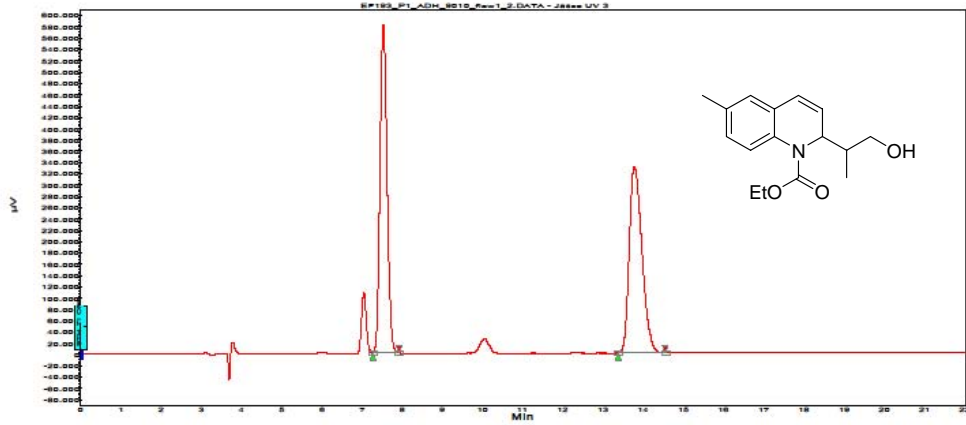

| Index | Name    | Start [Min] | Time [Min] | End [Min] | Ret. time [Min] | Offset [Min] | Quantity [% Area] | Height [µV] | Area [µV Min] | Area [%] |
|-------|---------|-------------|------------|-----------|-----------------|--------------|-------------------|-------------|---------------|----------|
| 1     | UNKNOWN | 7,275       | 7,533      | 7,924     |                 | 0,000        | 49,68             | 580357,9    | 119587,5      | 49,685   |
| 2     | UNKNOWN | 13,378      | 13,783     | 14,541    |                 | 0,000        | 50,32             | 329890,5    | 121105,6      | 50,315   |
| Total |         |             |            |           |                 |              | 100,00            | 910248,4    | 240693,1      | 100,000  |

**Chromatogram : CV-930-p1\_ADH\_9010\_flow1\_2**

Data file: CV-930-p1\_ADH\_9010\_flow1\_2\_DATA  
 Method: HPLC1\_ADH\_9010\_flow1\_acq\_40  
 Date: 03.02.2012 20:23:23

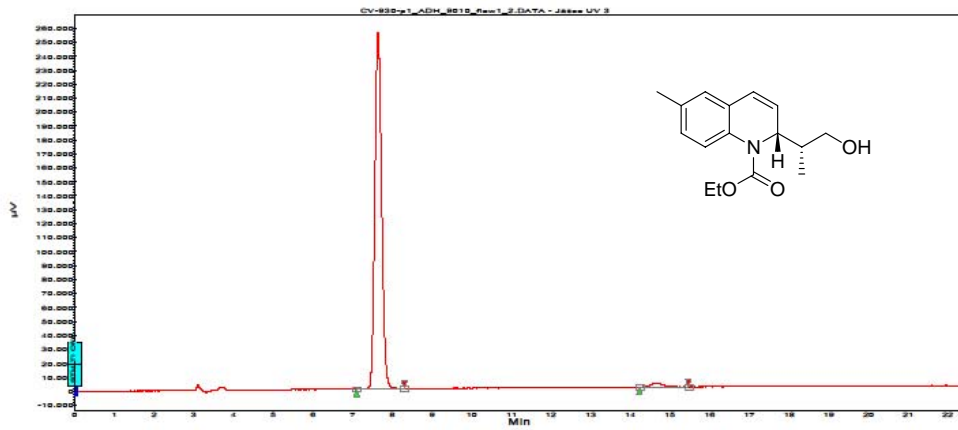

| Index | Start [Min] | Time [Min] | End [Min] | Area [%] |
|-------|-------------|------------|-----------|----------|
| 1     | 7,106       | 7,642      | 8,313     | 98,146   |
| 2     | 14,225      | 14,658     | 15,454    | 1,854    |
| Total |             |            |           | 100,000  |

**Chromatogram : EF280-P1\_ADH\_9010\_flow1\_5**

Data file: EF280-P1\_ADH\_9010\_flow1\_5.DATA  
 Method: HPLC1\_ADH\_9010\_flow1\_acq\_30  
 Date: 17.05.2012 21:10:15

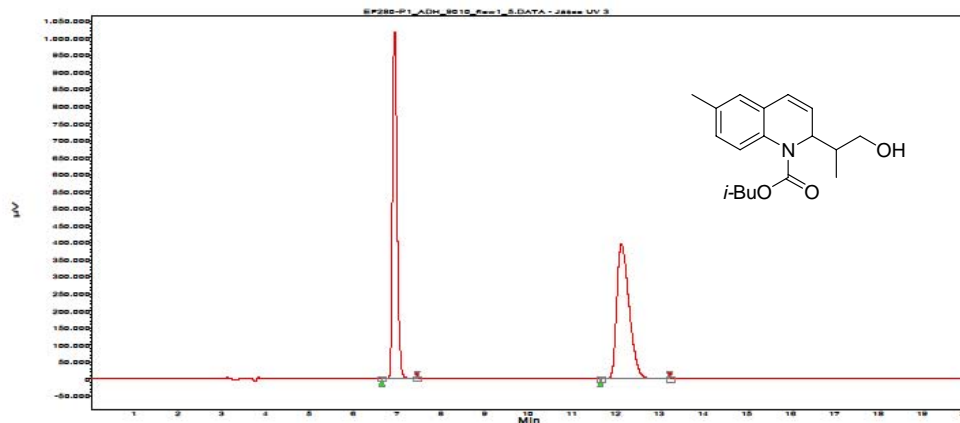

| Index | Start [Min] | Time [Min] | End [Min] | Area %  |
|-------|-------------|------------|-----------|---------|
| 1     | 6,663       | 6,967      | 7,460     | 49,381  |
| 2     | 11,653      | 12,133     | 13,233    | 50,609  |
| Total |             |            |           | 100,000 |

**Chromatogram : EF282-3P1(F2)\_ADH\_9010\_flow1\_3**

Data file: EF282-3P1(F2)\_ADH\_9010\_flow1\_3.DATA  
 Method: HPLC1\_ADH\_9010\_flow1\_acq\_30  
 Date: 21.05.2012 20:34:35

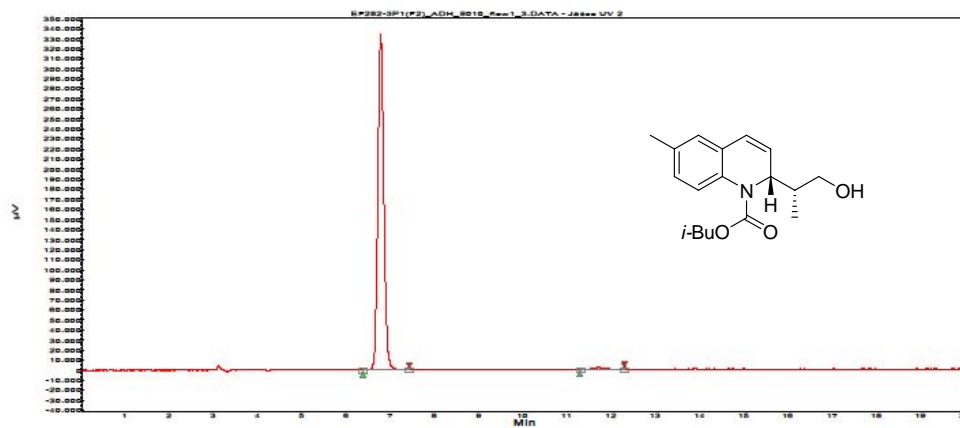

| Index | Start [Min] | Time [Min] | End [Min] | Area %  |
|-------|-------------|------------|-----------|---------|
| 1     | 6,398       | 6,782      | 7,434     | 98,704  |
| 2     | 11,293      | 11,725     | 12,303    | 1,286   |
| Total |             |            |           | 100,000 |



**Chromatogram : EF194P2\_ADH\_9010\_flow1\_5**

Data file: EF194P2\_ADH\_9010\_flow1\_5.DATA  
 Method: HPLC1\_ADH\_9010\_flow1\_acq\_60  
 Date: 27.01.2012 18:02:31

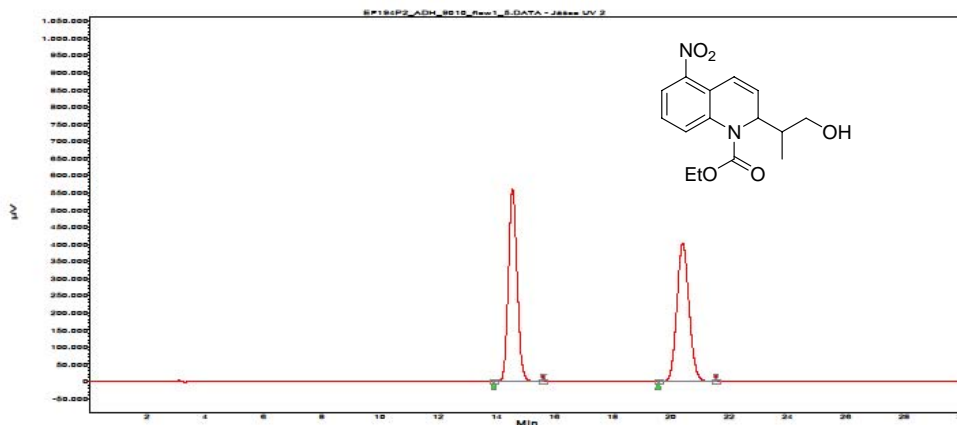

| Index | Start [Min] | Time [Min] | End [Min] | Area %  |
|-------|-------------|------------|-----------|---------|
| 1     | 13,916      | 14,558     | 15,612    | 49,998  |
| 2     | 19,558      | 20,400     | 21,531    | 50,014  |
| Total |             |            |           | 100,000 |

**Chromatogram : CV951R-p2\_ADH\_9010\_flow1\_3332**

Data file: CV951R-p2\_ADH\_9010\_flow1\_3332.DATA  
 Method: HPLC1\_ADH\_9010\_flow1\_acq\_60  
 Date: 27.02.2012 17:48:17

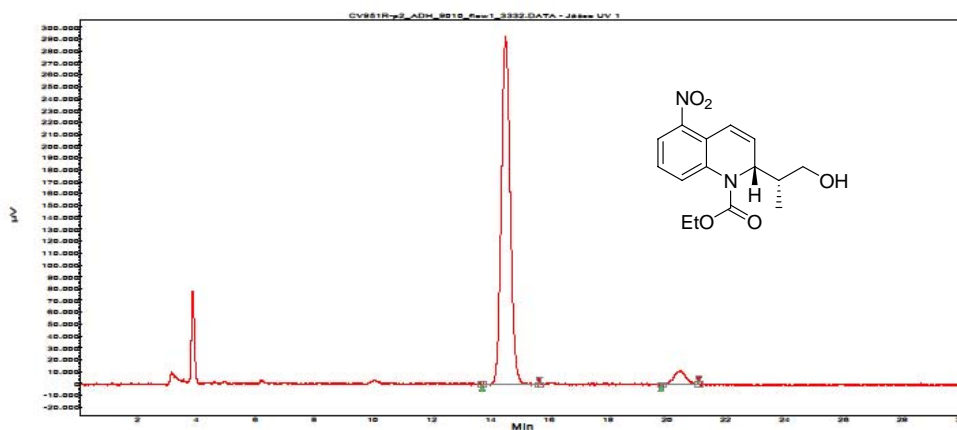

| Index | Start [Min] | Time [Min] | End [Min] | Area %  |
|-------|-------------|------------|-----------|---------|
| 1     | 13,719      | 14,508     | 15,846    | 95,114  |
| 2     | 19,804      | 20,442     | 21,070    | 4,886   |
| Total |             |            |           | 100,000 |

**Chromatogram : EF196\_P1\_ADH\_9010\_flow1\_4**

Data file: EF196\_P1\_ADH\_9010\_flow1\_4.DATA  
 Method: HPLC1\_ADH\_9010\_flow1\_acq\_60  
 Date: 26.01.2012 19:33:38

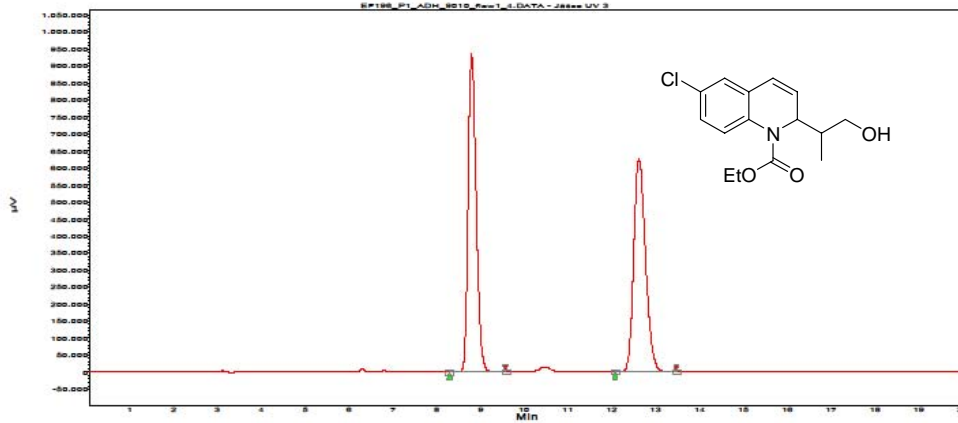

| Index | Name    | Start [Min] | Time [Min] | End [Min] | Ret. time Offset [Min] | Quantity [% Area] | Height [µV] | Area [µV.Min] | Area % [%] |
|-------|---------|-------------|------------|-----------|------------------------|-------------------|-------------|---------------|------------|
| 1     | UNKNOWN | 8,295       | 8,800      | 9,574     | 0,000                  | 50,49             | 936978,3    | 198949,7      | 50,486     |
| 2     | UNKNOWN | 12,074      | 12,617     | 13,466    | 0,000                  | 49,51             | 626505,4    | 195122,9      | 49,514     |
| Total |         |             |            |           |                        | 100,00            | 1563483,7   | 394072,6      | 100,000    |

**Chromatogram : CV-932-p1\_ADH\_9010\_flow1\_21**

Data file: CV-932-p1\_ADH\_9010\_flow1\_21.DATA  
 Method: HPLC1\_ADH\_9010\_flow1\_acq\_40  
 Date: 06.02.2012 17:52:33

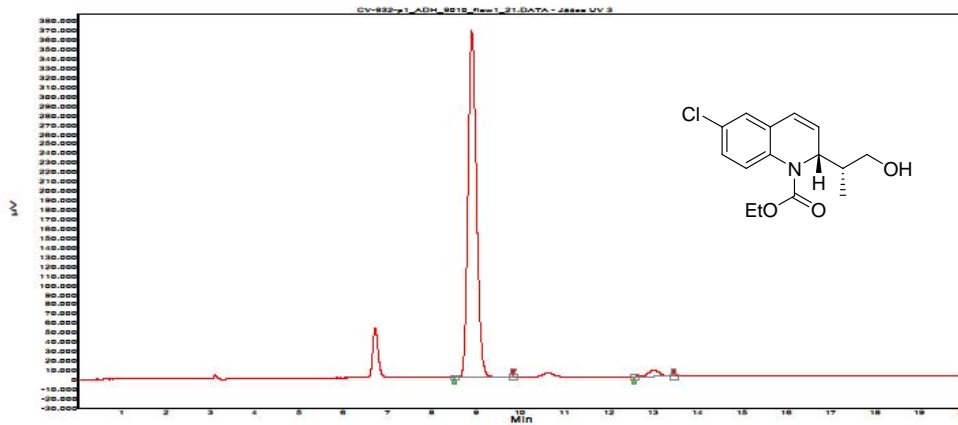

| Index | Start [Min] | Time [Min] | End [Min] | Area % [%] |
|-------|-------------|------------|-----------|------------|
| 2     | 8,509       | 8,908      | 9,833     | 97,501     |
| 1     | 12,562      | 13,017     | 13,456    | 2,499      |
| Total |             |            |           | 100,000    |

**Chromatogram : EF212P1\_ADH\_9010\_flow1\_71234**

Data file: EF212P1\_ADH\_9010\_flow1\_71234.DATA  
 Method: HPLC1\_ADH\_9010\_flow1\_acq\_80  
 Date: 12.02.2012 17:17:49

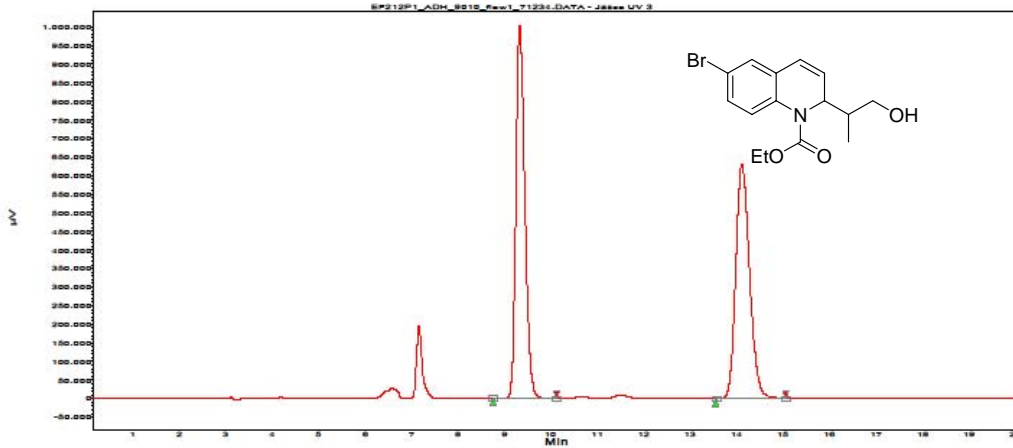

| Index | Name    | Start Time |        |        | End   | Ret. time Offset | Quantity  |          | Height  |          | Area % |
|-------|---------|------------|--------|--------|-------|------------------|-----------|----------|---------|----------|--------|
|       |         | [Min]      | [Min]  | [Min]  |       |                  | [Min]     | % Area   | [µV]    | [µV.Min] |        |
| 1     | UNKNOWN | 8,763      | 9,333  | 10,124 | 0,000 | 50,82            | 1003759,2 | 223612,4 | 50,818  |          |        |
| 2     | UNKNOWN | 13,547     | 14,108 | 15,052 | 0,000 | 49,18            | 627804,8  | 216412,7 | 49,182  |          |        |
| Total |         |            |        |        |       | 100,00           | 1631564,0 | 440025,1 | 100,000 |          |        |

**Chromatogram : CV947-p1\_ADH\_9010\_flow1\_111**

Data file: CV947-p1\_ADH\_9010\_flow1\_111.DATA  
 Method: HPLC1\_ADH\_9010\_flow1\_acq\_80  
 Date: 10.02.2012 21:07:00

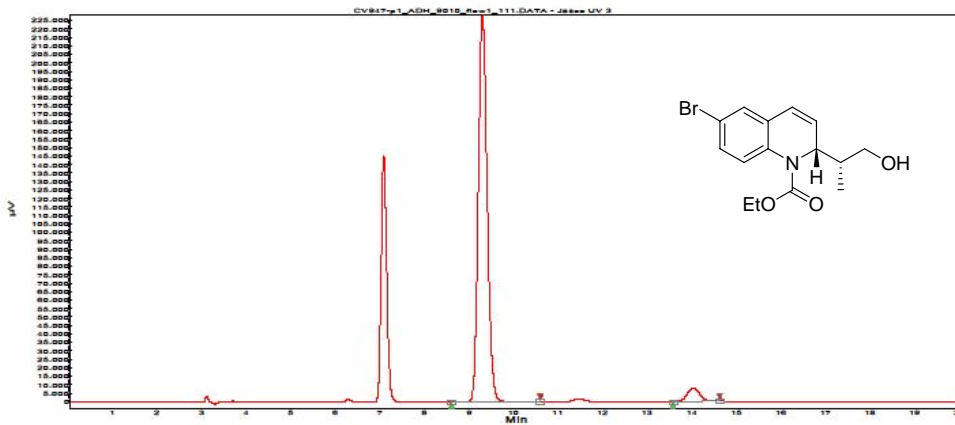

| Index | Name    | Start Time |        |        | End   | Ret. time Offset | Quantity |         | Height  |          | Area % |
|-------|---------|------------|--------|--------|-------|------------------|----------|---------|---------|----------|--------|
|       |         | [Min]      | [Min]  | [Min]  |       |                  | [Min]    | % Area  | [µV]    | [µV.Min] |        |
| 1     | UNKNOWN | 8,616      | 9,308  | 10,599 | 0,000 | 95,39            | 228809,1 | 82391,3 | 95,386  |          |        |
| 2     | UNKNOWN | 13,574     | 14,025 | 14,628 | 0,000 | 4,61             | 8009,8   | 2534,2  | 4,614   |          |        |
| Total |         |            |        |        |       | 100,00           | 236618,8 | 84925,5 | 100,000 |          |        |

**Chromatogram : EF195-F2\_ADH\_9010\_flow1\_2**

Data file: EF195-F2\_ADH\_9010\_flow1\_2.DATA  
 Method: HPLC1\_ADH\_9010\_flow1\_acq\_60  
 Date: 28.02.2012 15:40:33

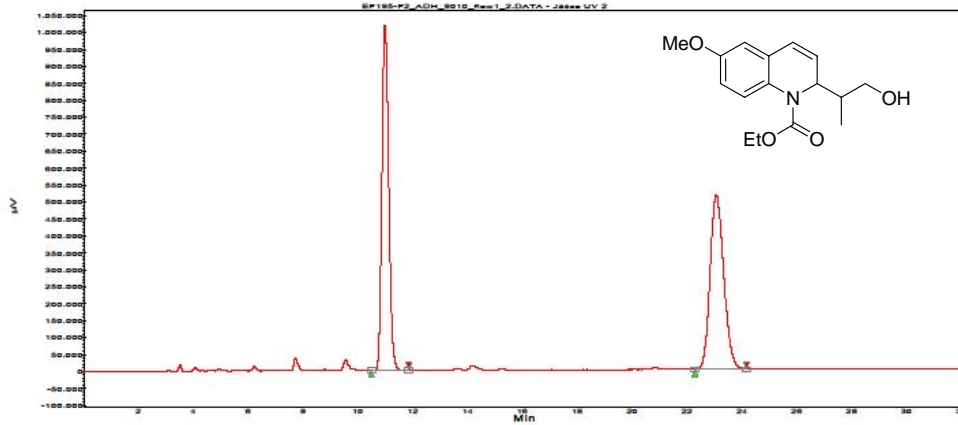

| Index | Start [Min] | Time [Min] | End [Min] | Area %  |
|-------|-------------|------------|-----------|---------|
| 1     | 10,505      | 10,892     | 11,855    | 49,441  |
| 2     | 22,285      | 23,050     | 24,161    | 50,559  |
| Total |             |            |           | 100,000 |

**Chromatogram : CV953-p1\_ADH\_9010\_flow1\_111**

Data file: CV953-p1\_ADH\_9010\_flow1\_111.DATA  
 Method: HPLC1\_ADH\_9010\_flow1\_acq\_60  
 Date: 28.02.2012 16:19:20

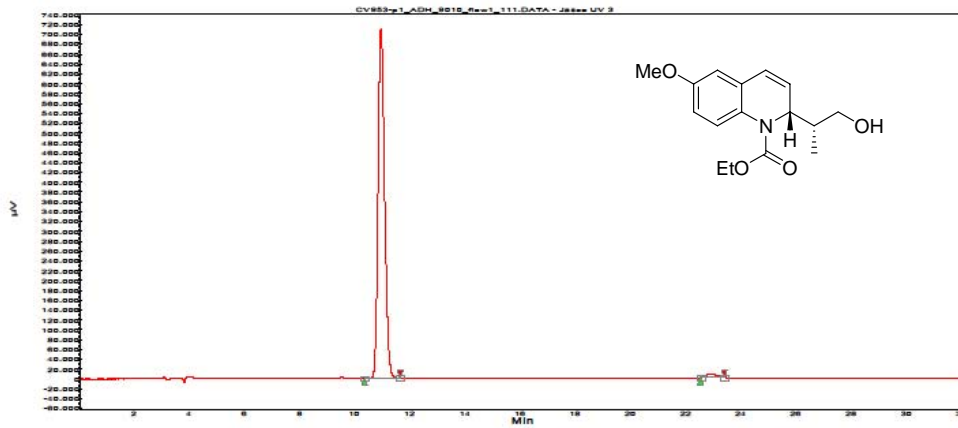

| Index | Name    | Start [Min] | Time [Min] | End [Min] | Ret. time Offset [Min] | Quantity [% Area] | Height [µV] | Area [µV.Min] | Area %  |
|-------|---------|-------------|------------|-----------|------------------------|-------------------|-------------|---------------|---------|
| 1     | UNKNOWN | 10,376      | 10,967     | 11,669    | 0,000                  | 98,34             | 709439,0    | 193273,1      | 98,337  |
| 2     | UNKNOWN | 22,538      | 22,950     | 23,400    | 0,000                  | 1,66              | 7315,6      | 3288,0        | 1,663   |
| Total |         |             |            |           |                        | 100,00            | 716754,6    | 196541,1      | 100,000 |

**Chromatogram : EF207P1\_ADH\_9010\_flow1\_7**

Data file: EF207P1\_ADH\_9010\_flow1\_7.DATA  
 Method: HPLC1\_ADH\_9010\_flow1\_acq\_60  
 Date: 11.02.2012 01:17:58

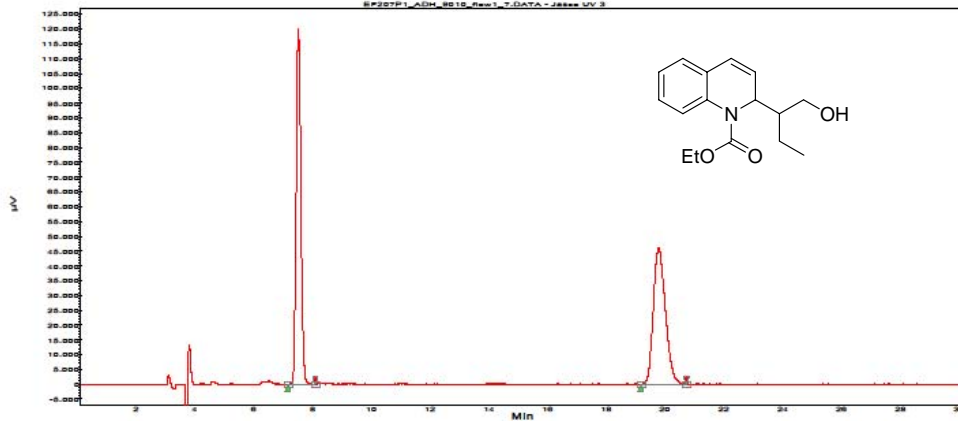

| Index | Name    | Start Time [Min] | Time [Min] | End [Min] | Ret. time Offset [Min] | Quantity [% Area] | Height [µV] | Area [µV Min] | Area % [%] |
|-------|---------|------------------|------------|-----------|------------------------|-------------------|-------------|---------------|------------|
| 1     | UNKNOWN | 7,174            | 7,533      | 8,105     | 0,000                  | 50,38             | 119978,4    | 22148,4       | 50,377     |
| 2     | UNKNOWN | 19,161           | 19,775     | 20,714    | 0,000                  | 49,62             | 46037,1     | 21817,3       | 49,623     |
| Total |         |                  |            |           |                        | 100,00            | 168015,5    | 43965,7       | 100,000    |

**Chromatogram : CV956-p1\_ADH\_9010\_flow1\_333**

Data file: CV956-p1\_ADH\_9010\_flow1\_333.DATA  
 Method: HPLC1\_ADH\_9010\_flow1\_acq\_40  
 Date: 28.02.2012 18:03:50

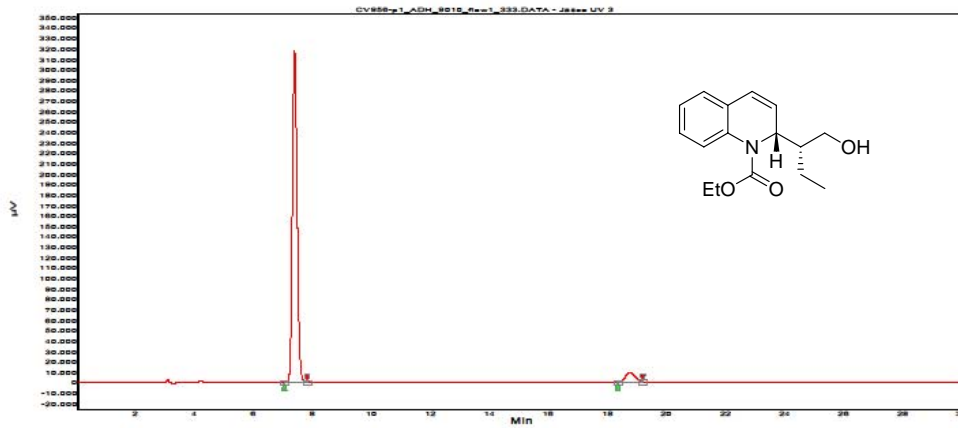

| Index | Start Time [Min] | Time [Min] | End [Min] | Area % [%] |
|-------|------------------|------------|-----------|------------|
| 1     | 7,059            | 7,408      | 7,835     | 94,334     |
| 2     | 18,350           | 18,758     | 19,187    | 5,666      |
| Total |                  |            |           | 100,000    |

**Chromatogram : EF208P1\_ADH\_9010\_flow1\_2**

Data file: EF208P1\_ADH\_9010\_flow1\_2.DATA  
 Method: HPLC1\_ADH\_9010\_flow1\_acq\_60  
 Date: 10.02.2012 19:08:56

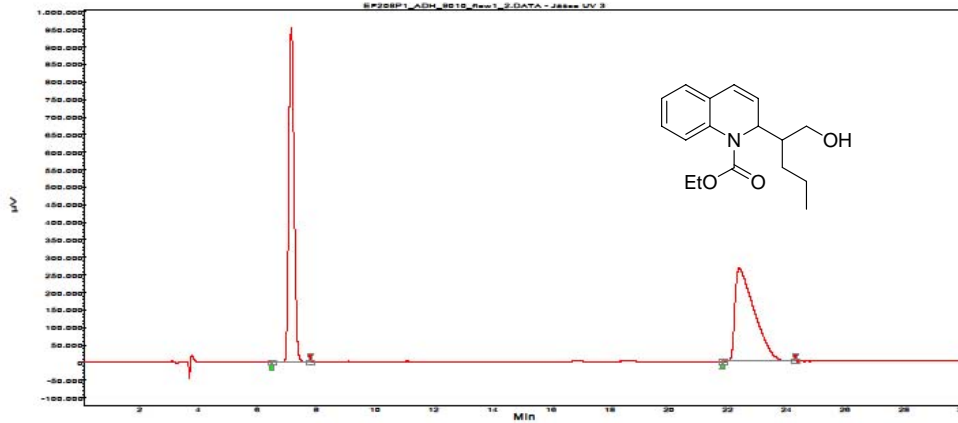

| Index | Name    | Start Time [Min] | Time [Min] | End Time [Min] | Ret. time Offset [Min] | Quantity [% Area] | Height [µV] | Area [µV.Min] | Area % [%] |
|-------|---------|------------------|------------|----------------|------------------------|-------------------|-------------|---------------|------------|
| 1     | UNKNOWN | 6.508            | 7.167      | 7.810          | 0.000                  | 49.48             | 954779.4    | 196833.4      | 49.482     |
| 2     | UNKNOWN | 21.818           | 22.382     | 24.296         | 0.000                  | 50.52             | 285380.7    | 200954.4      | 50.518     |
| Total |         |                  |            |                |                        | 100.00            | 1220160.1   | 397787.8      | 100.000    |

**Chromatogram : CV958-p1\_ADH\_9010\_flow1\_51**

Data file: CV958-p1\_ADH\_9010\_flow1\_51.DATA  
 Method: HPLC1\_ADH\_9010\_flow1\_acq\_40  
 Date: 27.02.2012 12:18:17

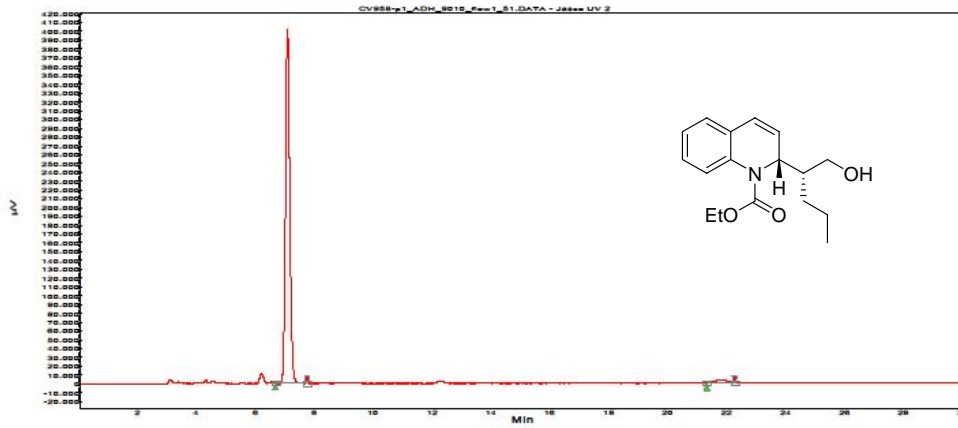

| Index | Start Time [Min] | Time [Min] | End Time [Min] | Area % [%] |
|-------|------------------|------------|----------------|------------|
| 1     | 6.694            | 7.108      | 7.769          | 97.488     |
| 2     | 21.322           | 21.858     | 22.273         | 2.512      |
| Total |                  |            |                | 100.000    |

Chromatogram : CV986-p1\_ADH\_9010\_flow1\_71

Data file: CV986-p1\_ADH\_9010\_flow1\_71.D\\ATA  
 Method: HPLC1\_ADH\_9010\_flow1\_acq\_30  
 Date: 20.05.2012 20:45:09

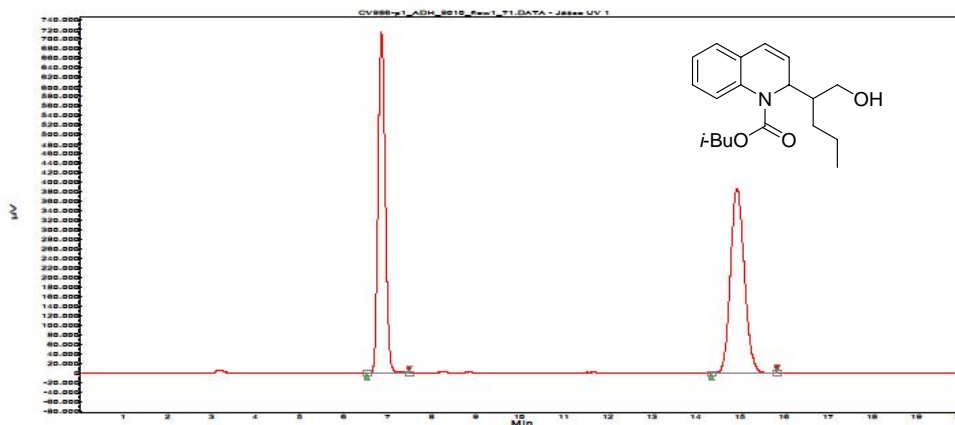

| Index | Start [Min] | Time [Min] | End [Min] | Area [%] |
|-------|-------------|------------|-----------|----------|
| 1     | 6,535       | 6,867      | 7,488     | 48,846   |
| 2     | 14,345      | 14,825     | 15,836    | 51,154   |
| Total |             |            |           | 100,000  |

Chromatogram : CV1020-f4\_ADH\_9010\_flow1\_2

Data file: CV1020-f4\_ADH\_9010\_flow1\_2.D\\ATA  
 Method: HPLC1\_ADH\_9010\_flow1\_acq\_40  
 Date: 01.08.2012 15:56:28

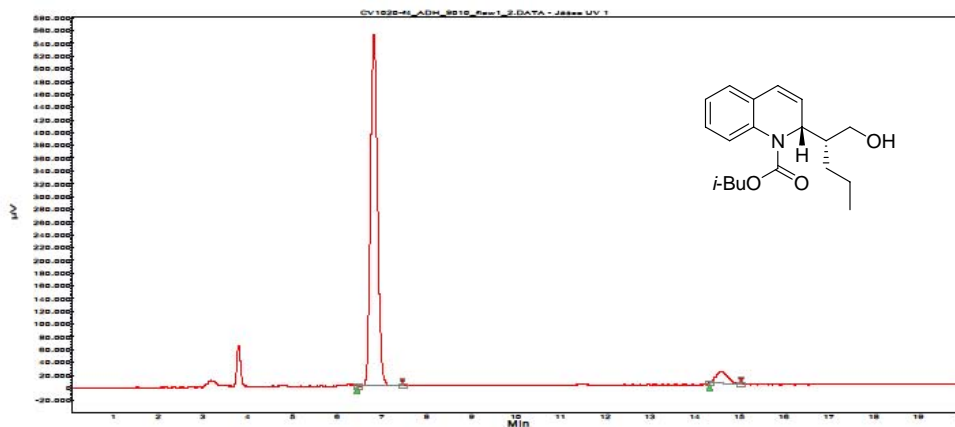

| Index | Start [Min] | Time [Min] | End [Min] | Area [%] |
|-------|-------------|------------|-----------|----------|
| 1     | 6,454       | 6,825      | 7,464     | 94,680   |
| 2     | 14,330      | 14,600     | 15,031    | 5,310    |
| Total |             |            |           | 100,000  |

**Chromatogram : EF209P1\_ADH\_9010\_flow1\_4**

Data file: EF209P1\_ADH\_9010\_flow1\_4.DATA  
 Method: HPLC1\_ADH\_9010\_flow1\_acq\_60  
 Date: 10.02.2012 23:12:29

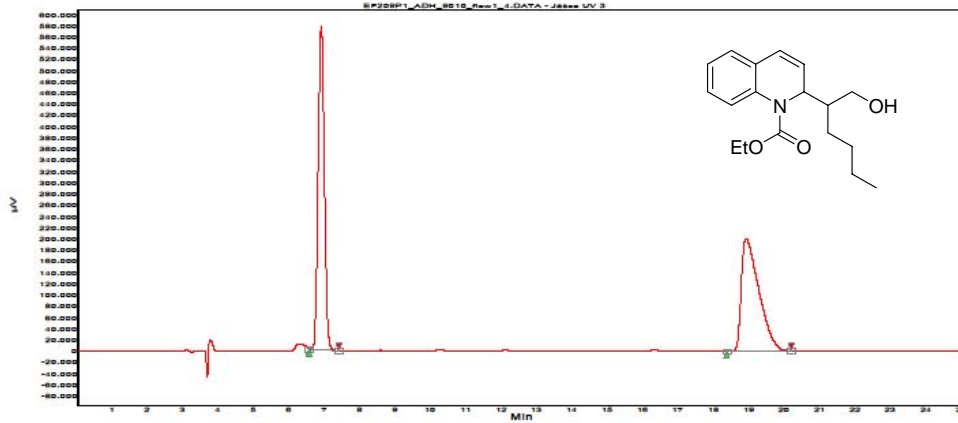

| Index | Name    | Start [Min] | Time [Min] | End [Min] | Ret. time Offset [Min] | Quantity [% Area] | Height [µV] | Area [µV Min] | Area % [%] |
|-------|---------|-------------|------------|-----------|------------------------|-------------------|-------------|---------------|------------|
| 1     | UNKNOWN | 6,580       | 6,933      | 7,420     | 0,000                  | 50,47             | 574520,1    | 116734,2      | 50,474     |
| 2     | UNKNOWN | 18,377      | 18,925     | 20,193    | 0,000                  | 49,53             | 200756,5    | 114539,6      | 49,526     |
| Total |         |             |            |           |                        | 100,00            | 775276,6    | 231273,8      | 100,000    |

**Chromatogram : CV959-p1\_ADH\_9010\_flow1\_444**

Data file: CV959-p1\_ADH\_9010\_flow1\_444.DATA  
 Method: HPLC1\_ADH\_9010\_flow1\_acq\_40  
 Date: 27.02.2012 18:51:01

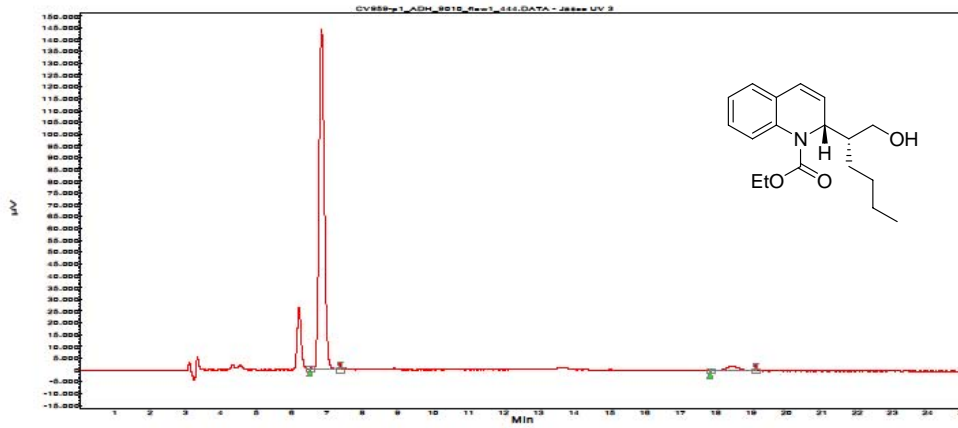

| Index | Start [Min] | Time [Min] | End [Min] | Area % [%] |
|-------|-------------|------------|-----------|------------|
| 1     | 6,524       | 6,858      | 7,376     | 96,748     |
| 2     | 17,836      | 18,407     | 19,127    | 3,252      |
| Total |             |            |           | 100,000    |



**Chromatogram : EF215-p1\_ADH\_9010\_flow1\_555**

Data file: EF215-p1\_ADH\_9010\_flow1\_555.DATA  
 Method: HPLC1\_ADH\_9010\_flow1\_acq\_40  
 Date: 28.02.2012 19:07:23

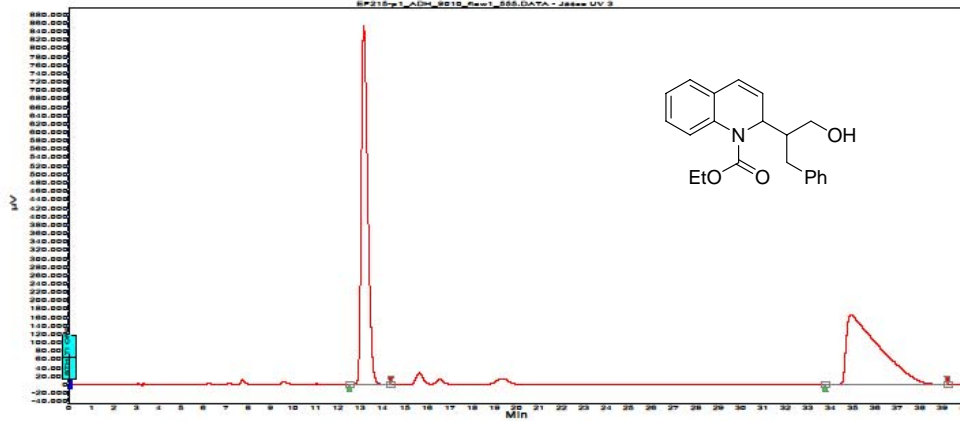

| Index | Start [Min] | Time [Min] | End [Min] | Area %  |
|-------|-------------|------------|-----------|---------|
| 1     | 12,521      | 13,167     | 14,380    | 49,851  |
| 2     | 33,780      | 34,892     | 39,215    | 50,149  |
| Total |             |            |           | 100,000 |

**Chromatogram : CV960-f1\_ADH\_9010\_flow1\_771**

Data file: CV960-f1\_ADH\_9010\_flow1\_771.DATA  
 Method: HPLC1\_ADH\_9010\_flow1\_acq\_60  
 Date: 28.02.2012 00:19:34

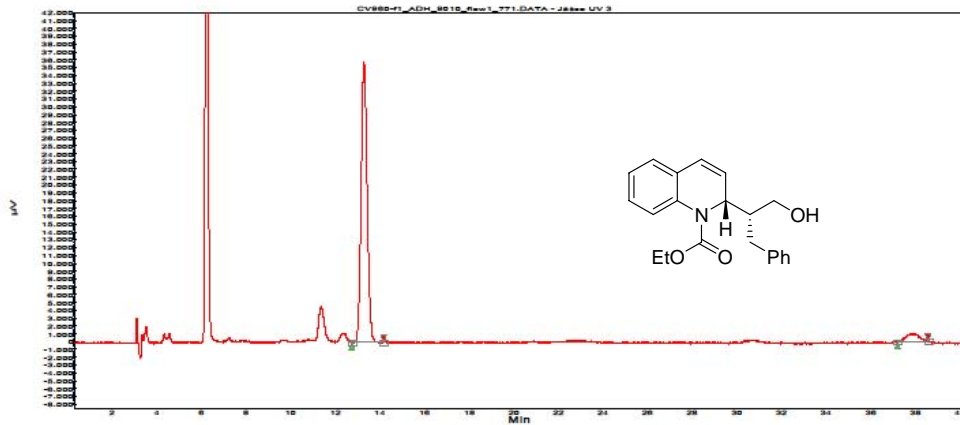

| Index | Name    | Start [Min] | Time [Min] | End [Min] | Ret. time Offset [Min] | Quantity [% Area] | Height [µV] | Area [µV.Min] | Area %  |
|-------|---------|-------------|------------|-----------|------------------------|-------------------|-------------|---------------|---------|
| 1     | UNKNOWN | 12,756      | 13,292     | 14,166    | 0,000                  | 94,28             | 35850,6     | 11182,5       | 94,281  |
| 2     | UNKNOWN | 37,183      | 37,792     | 38,559    | 0,000                  | 5,72              | 973,5       | 678,3         | 5,719   |
| Total |         |             |            |           |                        | 100,00            | 36824,1     | 11860,8       | 100,000 |

**Chromatogram : EF231-4\_ADH\_9010\_flow1\_4**

Data file: EF231-4\_ADH\_9010\_flow1\_4.D\\DATA  
 Method: HPLC1\_ADH\_9010\_flow1\_acq\_40  
 Date: 06.03.2012 23:53:54

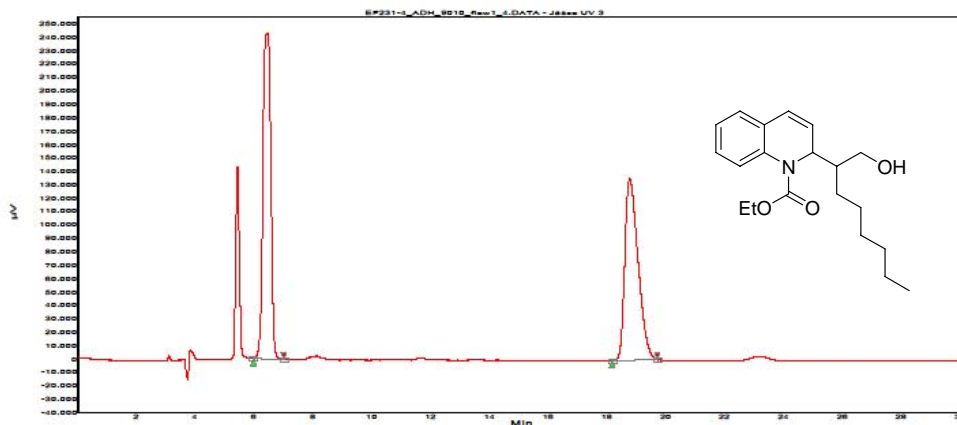

| Index | Start [Min] | Time [Min] | End [Min] | Area [%] |
|-------|-------------|------------|-----------|----------|
| 1     | 5,692       | 6,483      | 7,025     | 51,871   |
| 2     | 18,182      | 18,775     | 19,711    | 48,129   |
| Total |             |            |           | 100,000  |

**Chromatogram : CV961-2\_ADH\_9010\_flow1\_2**

Data file: CV961-2\_ADH\_9010\_flow1\_2.D\\DATA  
 Method: HPLC1\_ADH\_9010\_flow1\_acq\_40  
 Date: 14.03.2012 10:56:38

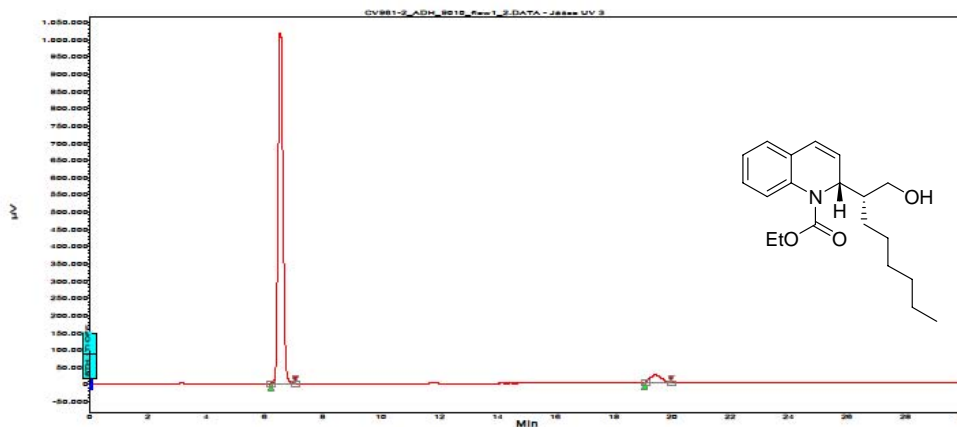

| Index | Start [Min] | Time [Min] | End [Min] | Area [%] |
|-------|-------------|------------|-----------|----------|
| 1     | 6,240       | 6,575      | 7,066     | 95,584   |
| 2     | 19,050      | 19,417     | 19,959    | 4,406    |
| Total |             |            |           | 100,000  |

**Chromatogram : CV987-p1\_ADH\_9010\_flow1\_91**

Data file: CV987-p1\_ADH\_9010\_flow1\_91.DATA  
 Method: HPLC1\_ADH\_9010\_flow1\_acq\_30  
 Date: 20.05.2012 21:50:35

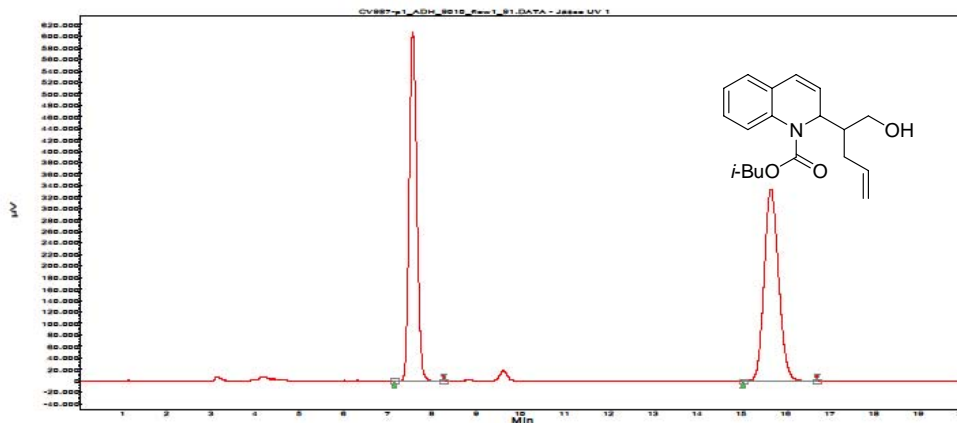

| Index | Start [Min] | Time [Min] | End [Min] | Area %  |
|-------|-------------|------------|-----------|---------|
| 1     | 7,159       | 7,575      | 8,275     | 48,961  |
| 2     | 15,031      | 15,667     | 16,705    | 51,039  |
| Total |             |            |           | 100,000 |

**Chromatogram : CV1021-f4\_ADH\_9010\_flow1\_21**

Data file: CV1021-f4\_ADH\_9010\_flow1\_21.DATA  
 Method: HPLC1\_ADH\_9010\_flow1\_acq\_40  
 Date: 01.06.2012 22:40:00

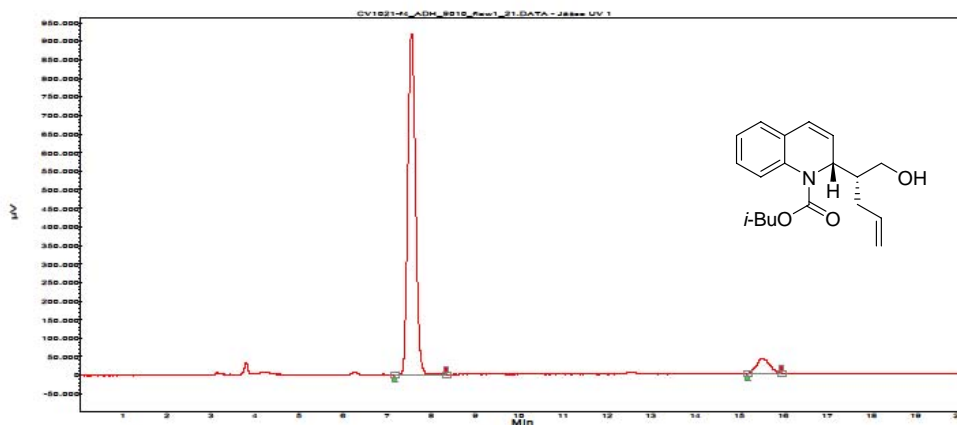

| Index | Start [Min] | Time [Min] | End [Min] | Area %  |
|-------|-------------|------------|-----------|---------|
| 1     | 7,178       | 7,558      | 8,340     | 93,062  |
| 2     | 15,186      | 15,550     | 15,954    | 6,938   |
| Total |             |            |           | 100,000 |

**Chromatogram : CV1066-p1\_ADH\_9010\_flow1\_2112**

Data file: CV1066-p1\_ADH\_9010\_flow1\_2112.DATA  
 Method: HPLC1\_ADH\_9010\_flow1\_acq\_60  
 Date: 29.08.2012 11:35:40

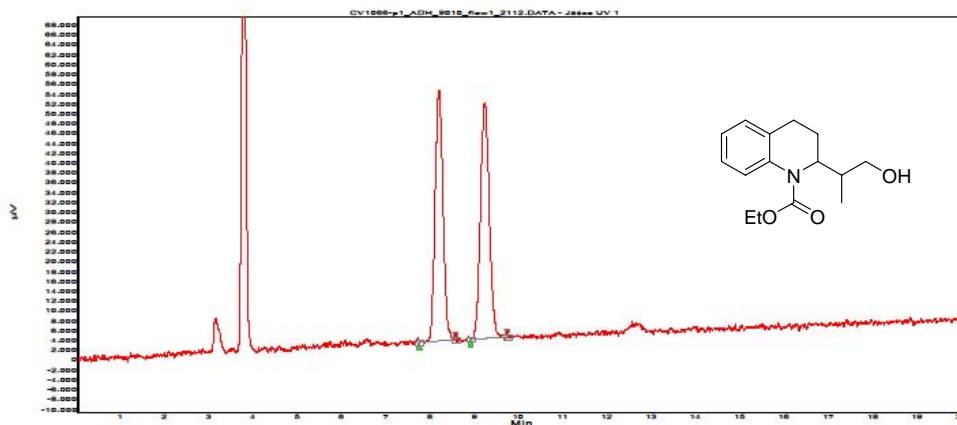

| Index | Start Time [Min] | End Time [Min] | Area [%] |
|-------|------------------|----------------|----------|
| 1     | 7,764            | 8,200          | 49,080   |
| 2     | 8,922            | 9,242          | 50,920   |
| Total |                  |                | 100,000  |

**Chromatogram : CV1206p1\_ADH\_9010\_flow1\_55555**

Data file: CV1206p1\_ADH\_9010\_flow1\_55555.DATA  
 Method: HPLC1\_ADH\_9010\_flow1\_acq\_40  
 Date: 05.09.2012 16:49:17

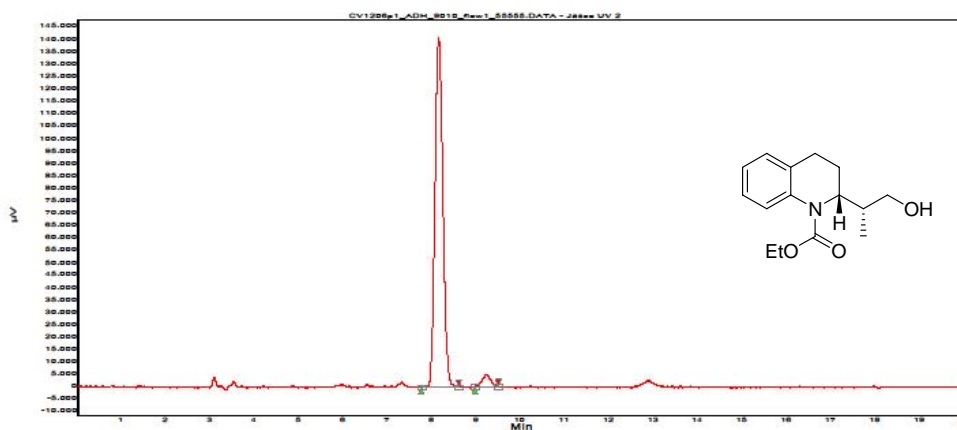

| Index | Start Time [Min] | End Time [Min] | Area [%] |
|-------|------------------|----------------|----------|
| 1     | 7,781            | 8,175          | 96,584   |
| 2     | 8,989            | 9,242          | 3,416    |
| Total |                  |                | 100,000  |

Chromatogram : CV1211\_ADH\_973\_flow1\_21

Data file: CV1211\_ADH\_973\_flow1\_21.DATA  
Method: HPLC1\_ADH\_973\_flow1\_acq\_50  
Date: 12.09.2012 11:11:31

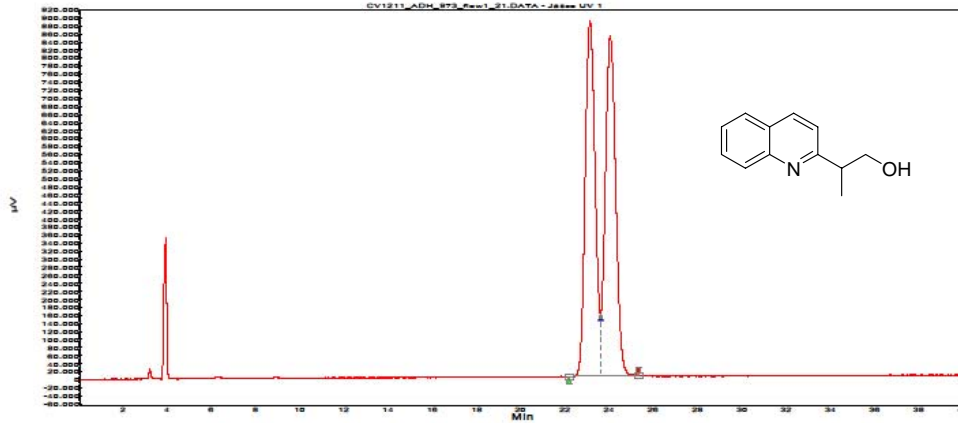

| Index | Start [Min] | Time [Min] | End [Min] | Area %  |
|-------|-------------|------------|-----------|---------|
| 1     | 22,180      | 23,125     | 23,611    | 49,878  |
| 2     | 23,611      | 24,050     | 25,312    | 50,122  |
| Total |             |            |           | 100,000 |

Chromatogram : CV-1205\_ADH\_973\_flow1\_5672

Data file: CV-1205\_ADH\_973\_flow1\_5672.DATA  
Method: HPLC1\_ADH\_973\_flow1\_acq\_50  
Date: 06.09.2012 22:03:09

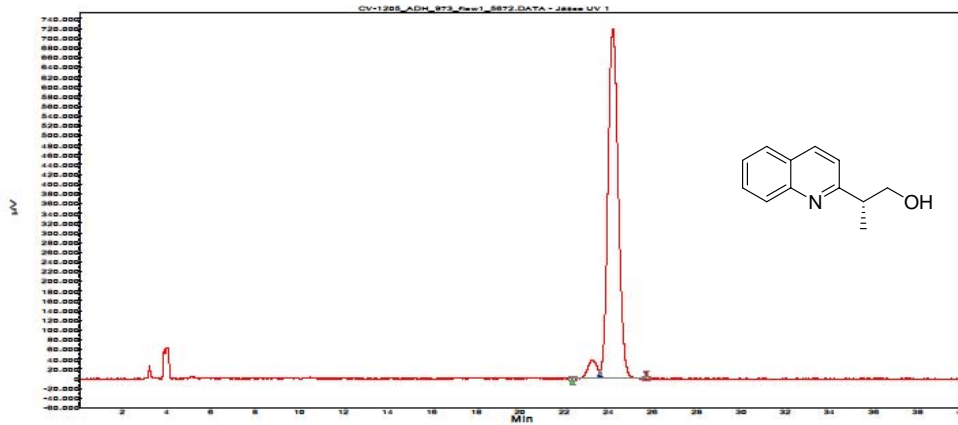

| Index | Start [Min] | Time [Min] | End [Min] | Area %  |
|-------|-------------|------------|-----------|---------|
| 1     | 22,358      | 23,267     | 23,602    | 4,238   |
| 2     | 23,602      | 24,200     | 25,897    | 95,762  |
| Total |             |            |           | 100,000 |

**Chromatogram : CV-1218-p\_ADH\_973\_flow05\_30115**

Data file: CV-1218-p\_ADH\_973\_flow05\_30115.DATA  
 Method: HPLC1\_ADH\_973\_flow05\_acq\_30  
 Date: 17.09.2012 19:28:09

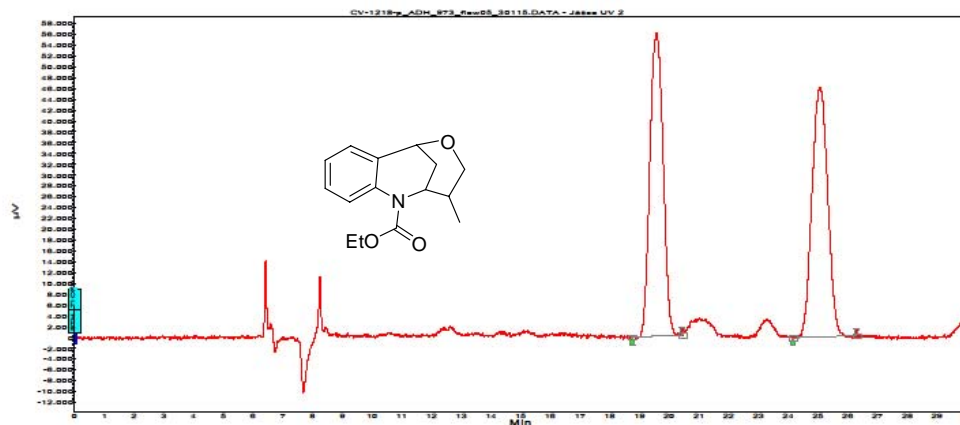

| Index | Start [Min] | Time [Min] | End [Min] | Area %  |
|-------|-------------|------------|-----------|---------|
| 1     | 18,750      | 19,587     | 20,424    | 50,568  |
| 2     | 24,143      | 25,058     | 26,281    | 49,432  |
| Total |             |            |           | 100,000 |

**Chromatogram : CV-1217p\_ADH\_973\_flow05\_3042**

Data file: CV-1217p\_ADH\_973\_flow05\_3042.DATA  
 Method: HPLC1\_ADH\_973\_flow05\_acq\_30  
 Date: 17.09.2012 15:47:36

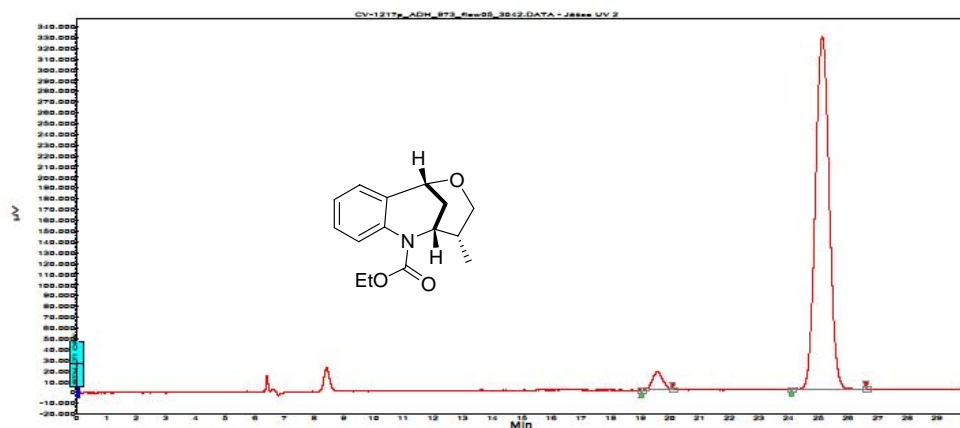

| Index | Start [Min] | Time [Min] | End [Min] | Area %  |
|-------|-------------|------------|-----------|---------|
| 1     | 19,029      | 19,558     | 20,083    | 3,661   |
| 2     | 24,081      | 25,125     | 26,591    | 96,339  |
| Total |             |            |           | 100,000 |

**Chromatogram : CV-1215-p2\_ADH\_973\_flow05\_3022**

Data file: CV-1215-p2\_ADH\_973\_flow05\_3022.DATA  
 Method: HPLC1\_ADH\_973\_flow05\_acq\_30  
 Date: 17.09.2012 16:20:19

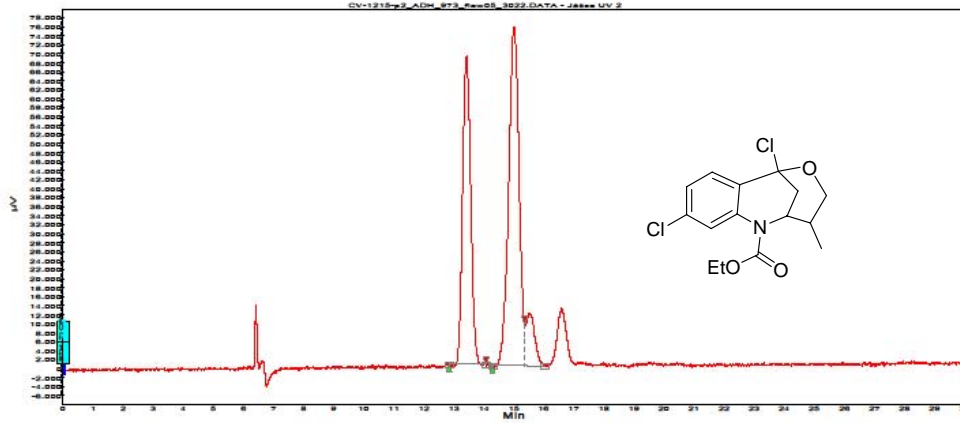

| Index | Start [Min] | Time [Min] | End [Min] | Area %  |
|-------|-------------|------------|-----------|---------|
| 1     | 12,838      | 13,425     | 14,066    | 41,241  |
| 2     | 14,293      | 15,008     | 15,366    | 58,759  |
| Total |             |            |           | 100,000 |

**Chromatogram : CV-1216-p2\_ADH\_973\_flow05\_23451**

Data file: CV-1216-p2\_ADH\_973\_flow05\_23451.DATA  
 Method: HPLC1\_ADH\_973\_flow05\_acq\_90  
 Date: 14.09.2012 12:06:02

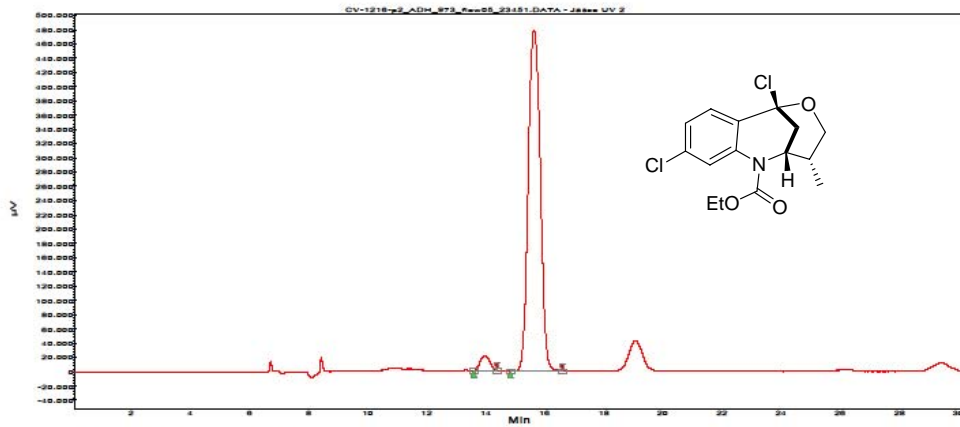

| Index | Start [Min] | Time [Min] | End [Min] | Area %  |
|-------|-------------|------------|-----------|---------|
| 1     | 13,599      | 13,975     | 14,377    | 3,339   |
| 2     | 14,844      | 15,633     | 16,586    | 96,661  |
| Total |             |            |           | 100,000 |

### Chromatogram : CV-3-p2\_ADH\_9010\_flow1\_333

Data file: CV-3-p2\_ADH\_9010\_flow1\_333.DATA  
Method: HPLC1\_ADH\_9010\_flow1\_acq\_40  
Date: 24.04.2012 13:31:46

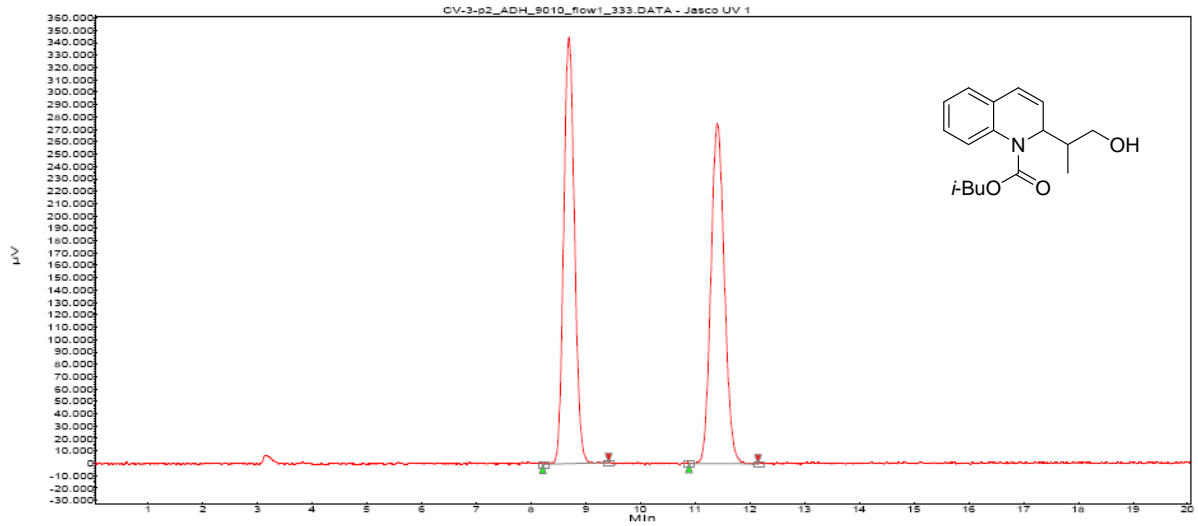

| Index | Start Time [Min] | End Time [Min] | Area %  |
|-------|------------------|----------------|---------|
| 1     | 8,223            | 8,700          | 50,022  |
| 2     | 10,888           | 11,408         | 49,978  |
| Total |                  |                | 100,000 |

### Chromatogram : CV-11-p2\_ADH\_9010\_flow1\_555

Data file: CV-11-p2\_ADH\_9010\_flow1\_555.DATA  
Method: HPLC1\_ADH\_9010\_flow1\_acq\_40  
Date: 24.04.2012 14:39:43

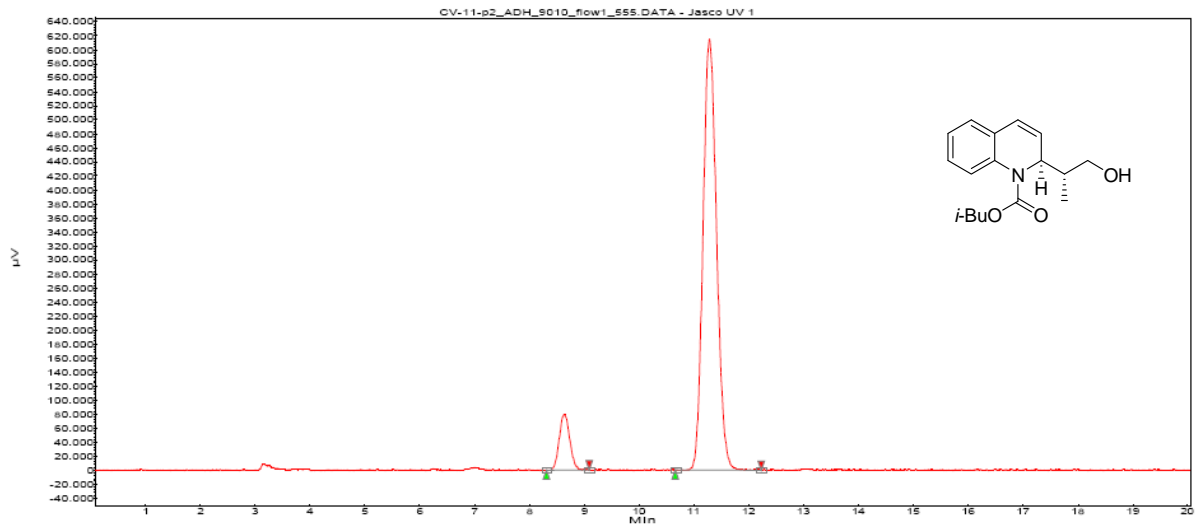

| Index | Start Time [Min] | End Time [Min] | Area %  |
|-------|------------------|----------------|---------|
| 1     | 8,309            | 8,633          | 9,078   |
| 2     | 10,660           | 11,283         | 90,922  |
| Total |                  |                | 100,000 |



### Chromatogram : CV-919-p2\_ADH\_9010\_flow1\_61

Data file: CV-919-p2\_ADH\_9010\_flow1\_61.DATA  
Method: HPLC1\_ADH\_9010\_flow1\_acq\_30  
Date: 06.01.2012 21:32:01

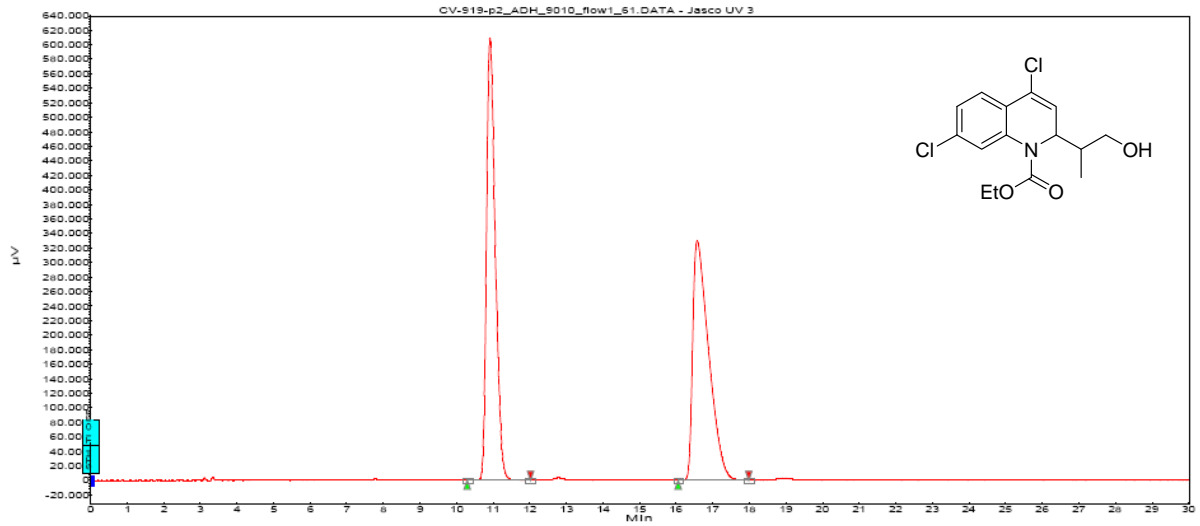

| Index | Start [Min] | Time [Min] | End [Min] | Area %  |
|-------|-------------|------------|-----------|---------|
| 1     | 10,289      | 10,908     | 12,025    | 50,641  |
| 2     | 16,054      | 16,567     | 17,975    | 49,359  |
| Total |             |            |           | 100,000 |

### Chromatogram : CV-916p2\_ADH\_9010\_flow1\_81

Data file: CV-916p2\_ADH\_9010\_flow1\_81.DATA  
Method: HPLC1\_ADH\_9010\_flow1\_acq\_30  
Date: 06.01.2012 22:37:27

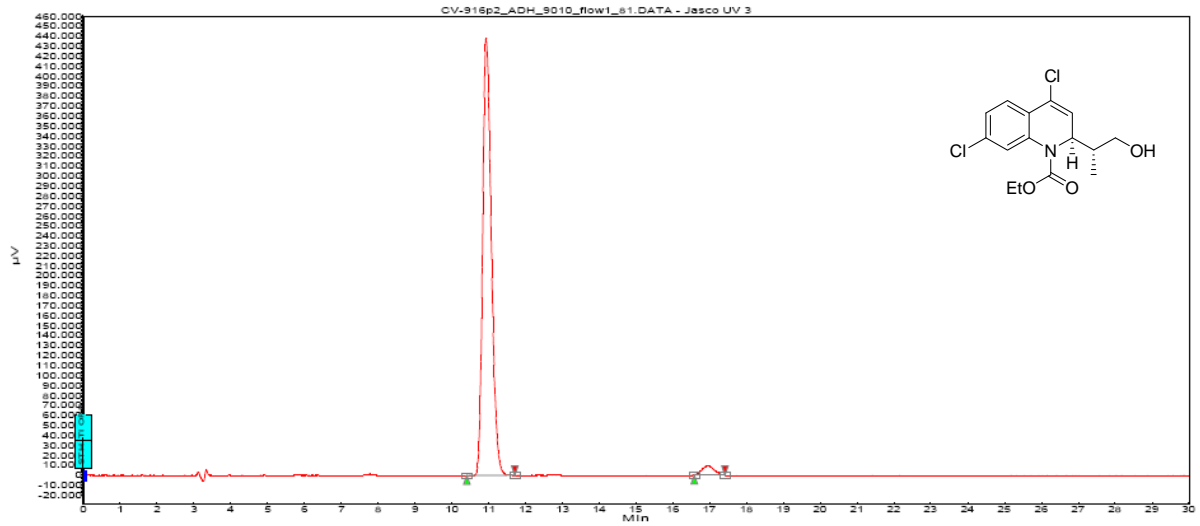

| Index | Start [Min] | Time [Min] | End [Min] | Area %  |
|-------|-------------|------------|-----------|---------|
| 1     | 10,413      | 10,933     | 11,715    | 97,091  |
| 2     | 16,581      | 16,958     | 17,417    | 2,909   |
| Total |             |            |           | 100,000 |

### Chromatogram : CV-920p1\_ADH\_9010\_flow1\_234

Data file: CV-920p1\_ADH\_9010\_flow1\_234.DATA  
Method: HPLC1\_ADH\_9010\_flow1\_acq\_60  
Date: 11.01.2012 20:31:15

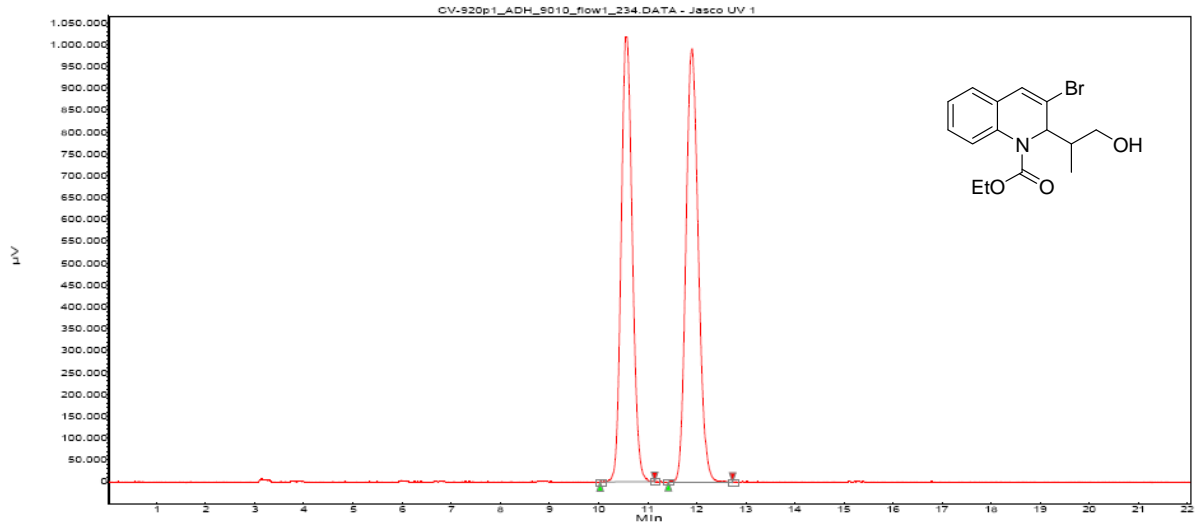

| Index | Start [Min] | Time [Min] | End [Min] | Area %  |
|-------|-------------|------------|-----------|---------|
| 1     | 10,031      | 10,550     | 11,142    | 48,102  |
| 2     | 11,426      | 11,908     | 12,727    | 51,898  |
| Total |             |            |           | 100,000 |

### Chromatogram : CV-917p1\_ADH\_9010\_flow1\_789

Data file: CV-917p1\_ADH\_9010\_flow1\_789.DATA  
Method: HPLC1\_ADH\_9010\_flow1\_acq\_30  
Date: 11.01.2012 21:56:13

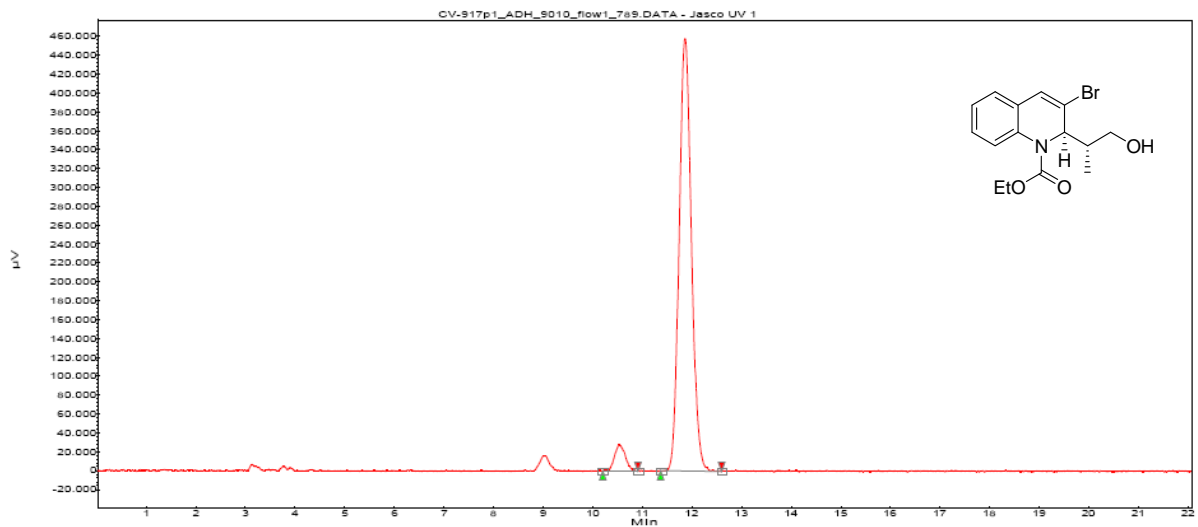

| Index | Start [Min] | Time [Min] | End [Min] | Area %  |
|-------|-------------|------------|-----------|---------|
| 1     | 10,206      | 10,542     | 10,912    | 5,077   |
| 2     | 11,367      | 11,867     | 12,596    | 94,923  |
| Total |             |            |           | 100,000 |

**Chromatogram : CV999-p1\_ADH\_9010\_flow1\_5551**

Data file: CV999-p1\_ADH\_9010\_flow1\_5551.DATA  
 Method: HPLC1\_ADH\_9010\_flow1\_acq\_40  
 Date: 09.05.2012 20:51:33

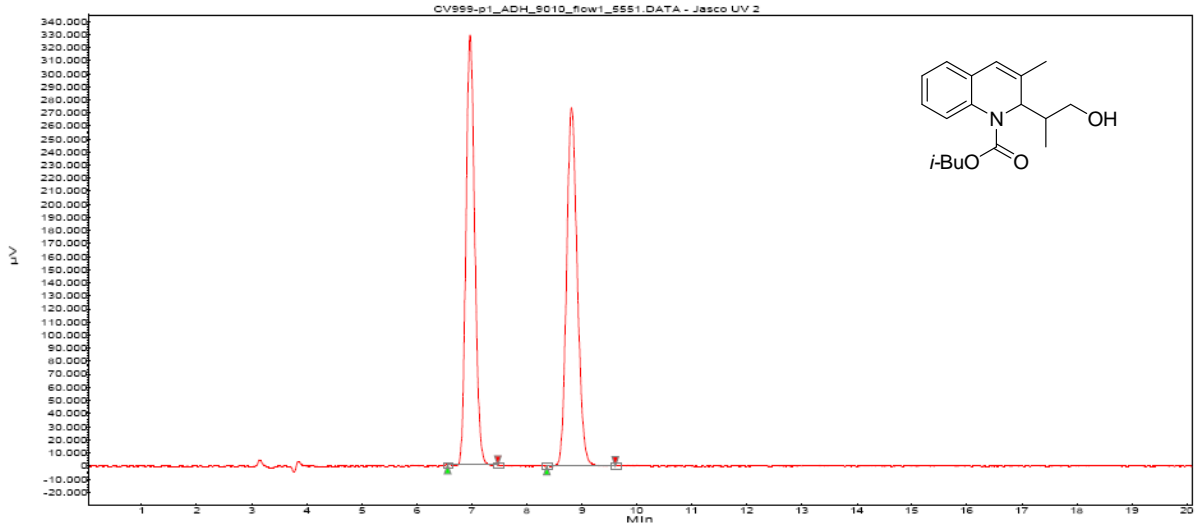

| Index | Start Time | Time  | End   | Area %  |
|-------|------------|-------|-------|---------|
|       | [Min]      | [Min] | [Min] | [%]     |
| 1     | 6,563      | 6,975 | 7,474 | 49,388  |
| 2     | 8,364      | 8,817 | 9,606 | 50,612  |
| Total |            |       |       | 100,000 |

**Chromatogram : CV1002-p1-ADH\_9010\_flow1\_acq604123**

Data file: CV1002-p1-ADH\_9010\_flow1\_acq604123.DATA  
 Method: HPLC2\_ADH\_9010\_flow1\_acq60  
 Date: 11.05.2012 12:07:52

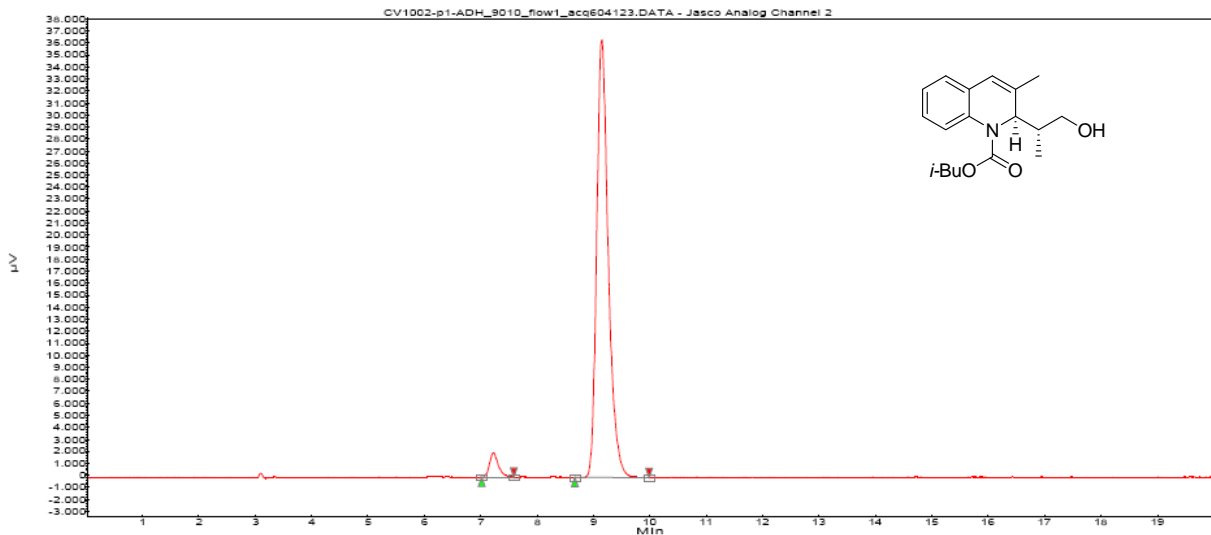

| Index | Name    | Start | Time  | End   | Ret. time Offset | Quantity | Height  | Area     | Area %  |
|-------|---------|-------|-------|-------|------------------|----------|---------|----------|---------|
|       |         | [Min] | [Min] | [Min] | [Min]            | [% Area] | [µV]    | [µV.Min] | [%]     |
| 1     | UNKNOWN | 7,015 | 7,225 | 7,589 | 0,000            | 4,01     | 2011,7  | 362,6    | 4,007   |
| 2     | UNKNOWN | 8,667 | 9,150 | 9,983 | 0,000            | 95,99    | 36425,1 | 8687,8   | 95,993  |
| Total |         |       |       |       |                  | 100,00   | 38436,8 | 9050,4   | 100,000 |

### Chromatogram : EF193\_P2\_ADH\_9010\_flow1\_3

Data file: EF193\_P2\_ADH\_9010\_flow1\_3.DATA  
Method: HPLC1\_ADH\_9010\_flow1\_acq\_60  
Date: 26.01.2012 18:30:55

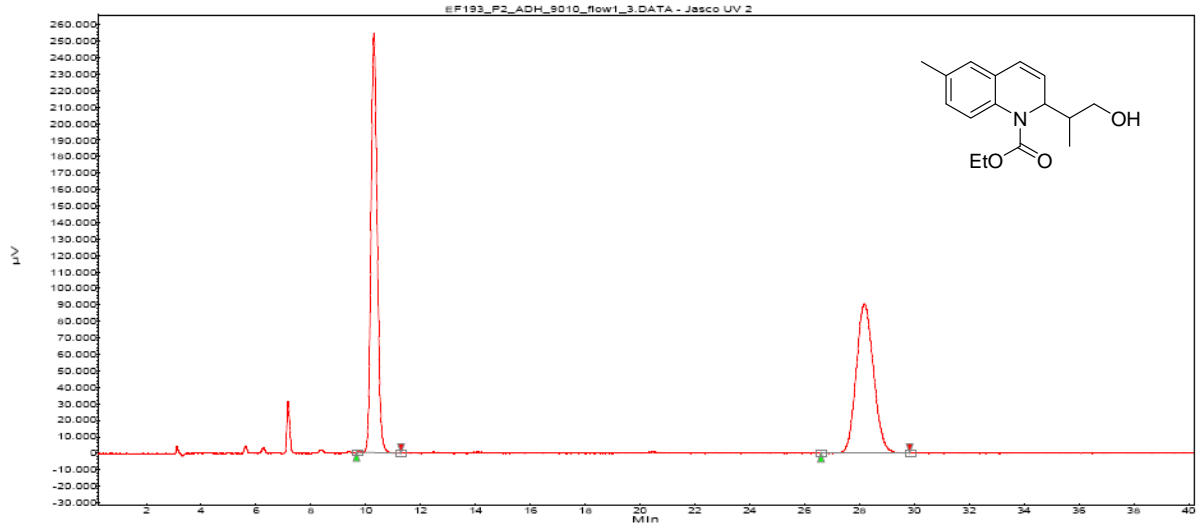

| Index | Start Time [Min] | End Time [Min] | Area %  |
|-------|------------------|----------------|---------|
| 1     | 9,669            | 10,300         | 50,199  |
| 2     | 26,591           | 28,167         | 49,801  |
| Total |                  |                | 100,000 |

### Chromatogram : CV-930-p2\_ADH\_9010\_flow1\_3

Data file: CV-930-p2\_ADH\_9010\_flow1\_3.DATA  
Method: HPLC1\_ADH\_9010\_flow1\_acq\_40  
Date: 03.02.2012 20:48:19

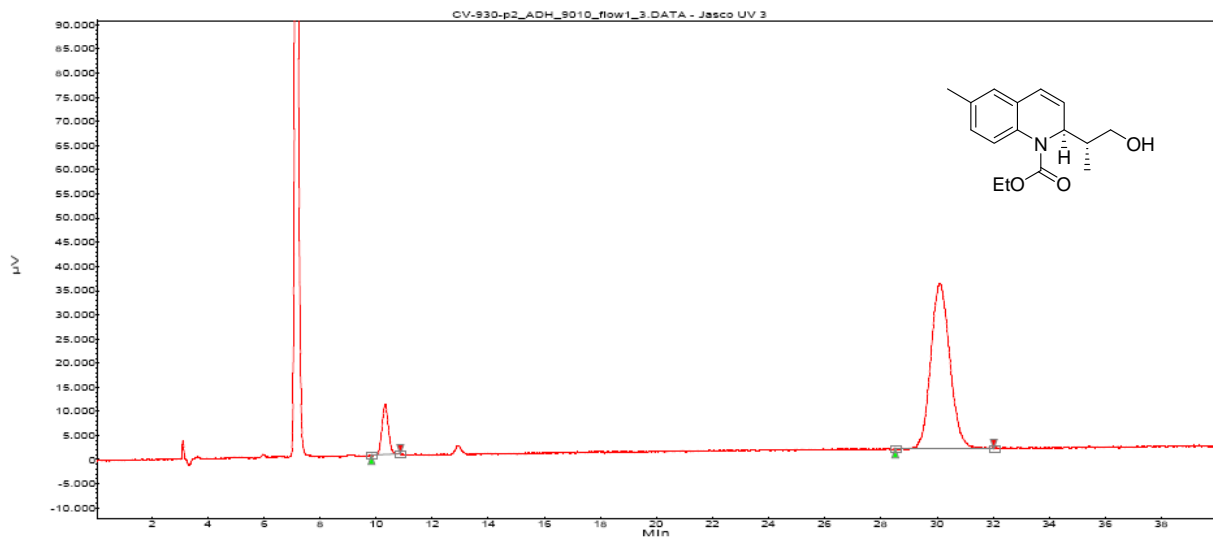

| Index | Start Time [Min] | End Time [Min] | Area %  |
|-------|------------------|----------------|---------|
| 1     | 9,835            | 10,325         | 9,172   |
| 2     | 28,512           | 30,100         | 90,828  |
| Total |                  |                | 100,000 |

### Chromatogram : EF280\_4\_ADH\_9010\_flow1\_777

Data file: EF280\_4\_ADH\_9010\_flow1\_777.DATA  
Method: HPLC1\_ADH\_9010\_flow1\_acq\_30  
Date: 16.05.2012 22:33:02

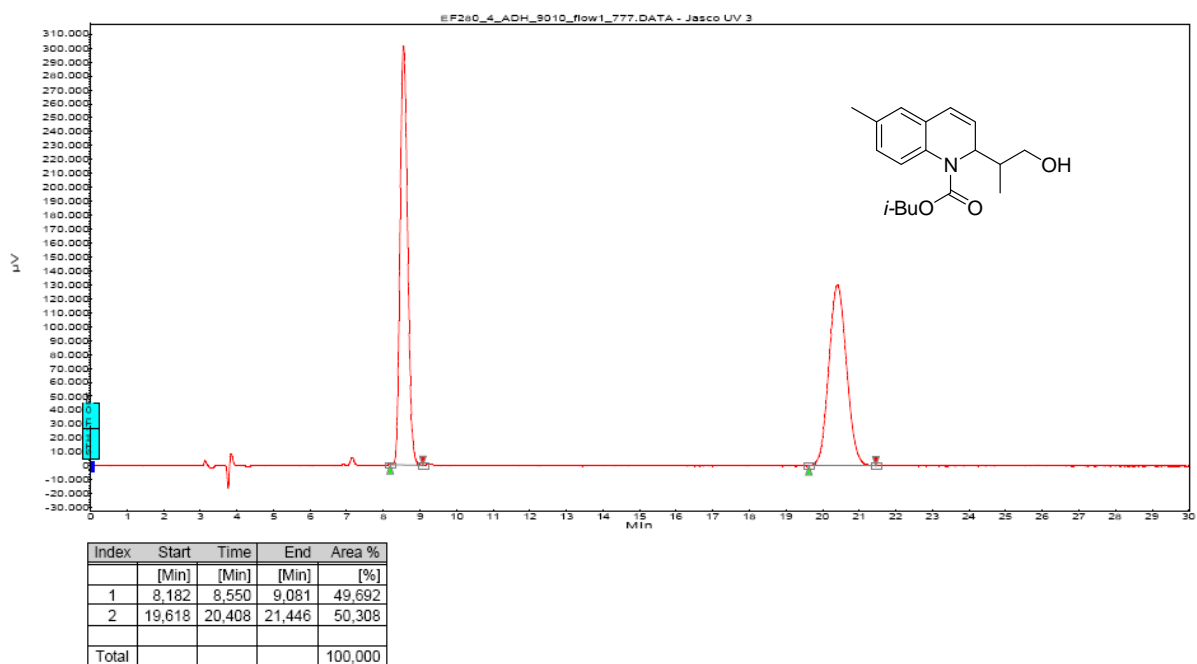

### Chromatogram : EF282-3\_F4\_ADH\_9010\_flow1\_1

Data file: EF282-3\_F4\_ADH\_9010\_flow1\_1.DATA  
Method: HPLC1\_ADH\_9010\_flow1\_acq\_30  
Date: 21.05.2012 00:01:32

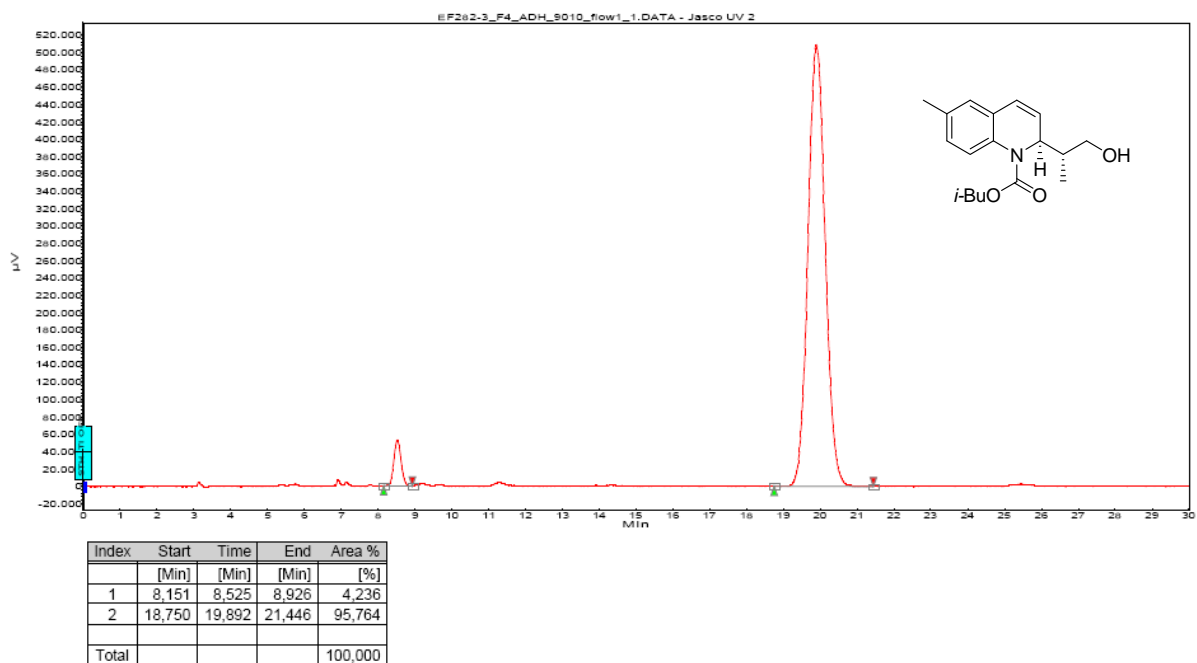

### Chromatogram : EF194P2\_ADH\_9010\_flow1\_5

Data file: EF194P2\_ADH\_9010\_flow1\_5.DATA  
Method: HPLC1\_ADH\_9010\_flow1\_acq\_60  
Date: 27.01.2012 18:02:31

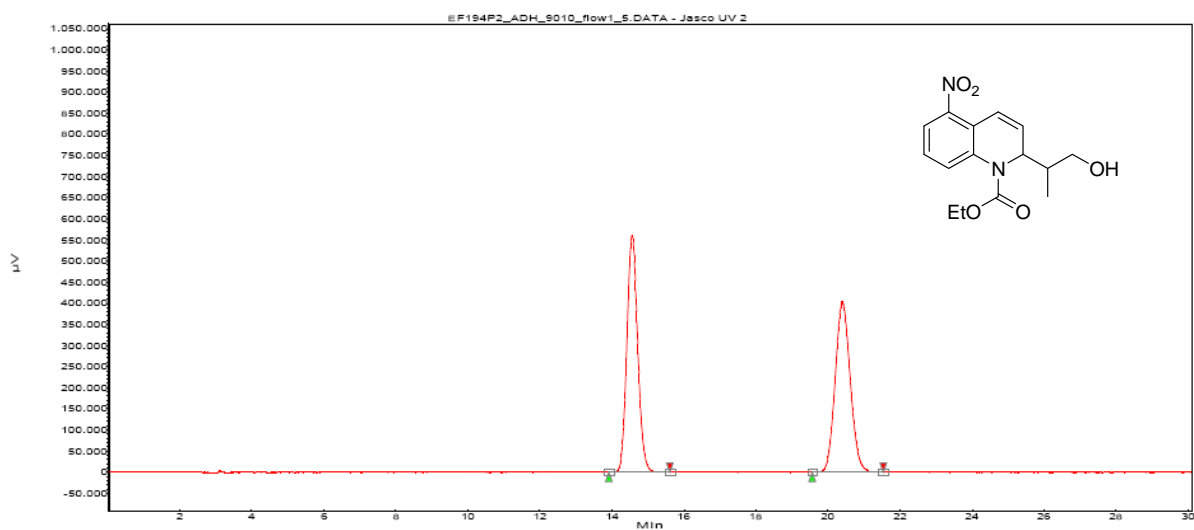

| Index | Start Time [Min] | Time [Min] | End [Min] | Area %  |
|-------|------------------|------------|-----------|---------|
| 1     | 13.916           | 14.558     | 15.612    | 49.986  |
| 2     | 19.558           | 20.400     | 21.531    | 50.014  |
| Total |                  |            |           | 100.000 |

### Chromatogram : CV951R-p1\_ADH\_9010\_flow1\_999

Data file: CV951R-p1\_ADH\_9010\_flow1\_999.DATA  
Method: HPLC1\_ADH\_9010\_flow1\_acq\_60  
Date: 27.02.2012 21:11:22

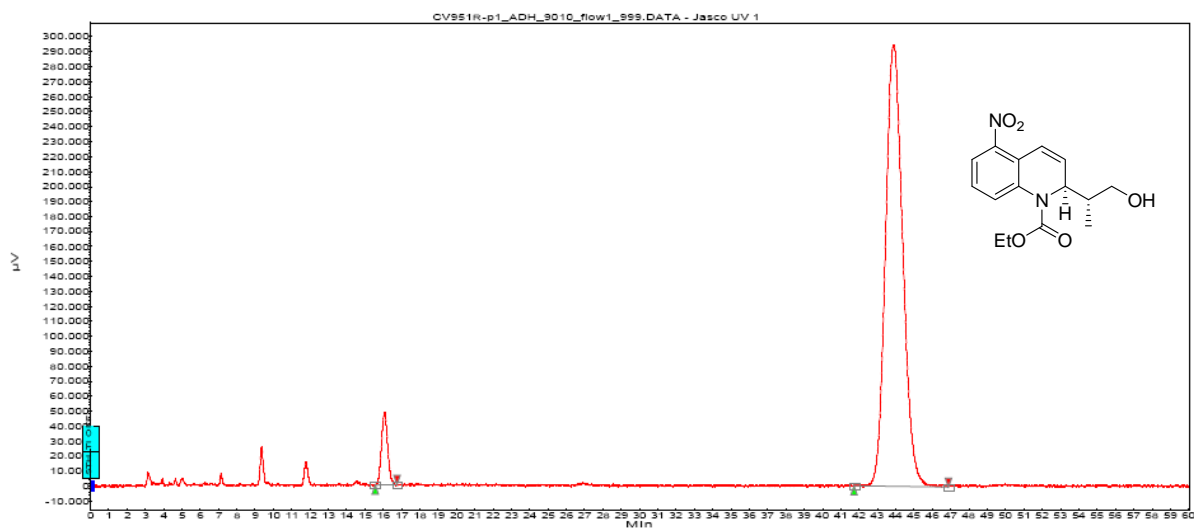

| Index | Start Time [Min] | Time [Min] | End [Min] | Area %  |
|-------|------------------|------------|-----------|---------|
| 1     | 15.558           | 16.067     | 16.736    | 5.535   |
| 2     | 41.715           | 43.875     | 46.860    | 94.465  |
| Total |                  |            |           | 100.000 |

### Chromatogram : EF196\_P2\_ADH\_9010\_flow1\_5

Data file: EF196\_P2\_ADH\_9010\_flow1\_5.DATA  
Method: HPLC1\_ADH\_9010\_flow1\_acq\_60  
Date: 26.01.2012 20:03:37

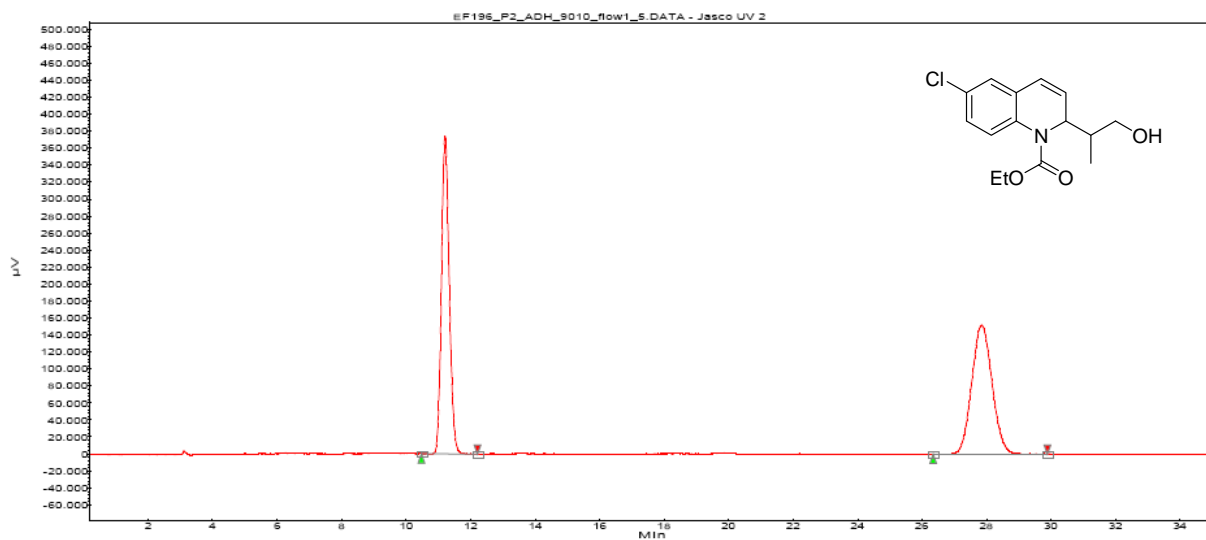

| Index | Start Time [Min] | End Time [Min] | Area [%] |
|-------|------------------|----------------|----------|
| 1     | 10,475           | 11,208         | 48,615   |
| 2     | 26,343           | 27,842         | 51,385   |
| Total |                  |                | 100,000  |

### Chromatogram : CV-932-p2\_ADH\_9010\_flow1\_31

Data file: CV-932-p2\_ADH\_9010\_flow1\_31.DATA  
Method: HPLC1\_ADH\_9010\_flow1\_acq\_40  
Date: 06.02.2012 18:17:09

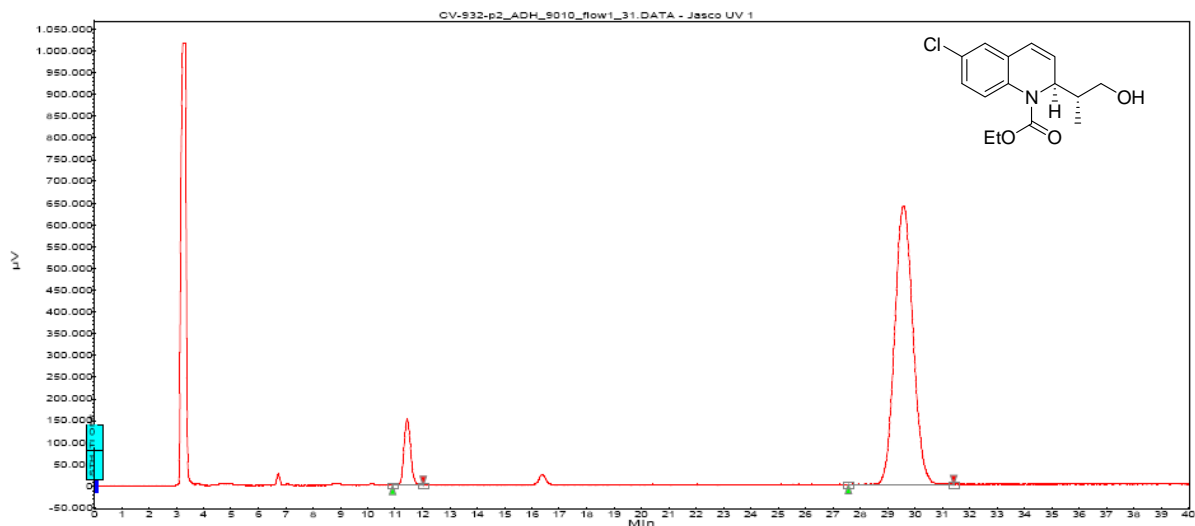

| Index | Start Time [Min] | End Time [Min] | Area [%] |
|-------|------------------|----------------|----------|
| 1     | 10,909           | 11,442         | 7,893    |
| 2     | 27,562           | 29,558         | 92,107   |
| Total |                  |                | 100,000  |

### Chromatogram : EF212P2\_ADH\_9010\_flow1\_91234

Data file: EF212P2\_ADH\_9010\_flow1\_91234.DATA  
 Method: HPLC1\_ADH\_9010\_flow1\_acq\_60  
 Date: 12.02.2012 18:20:32

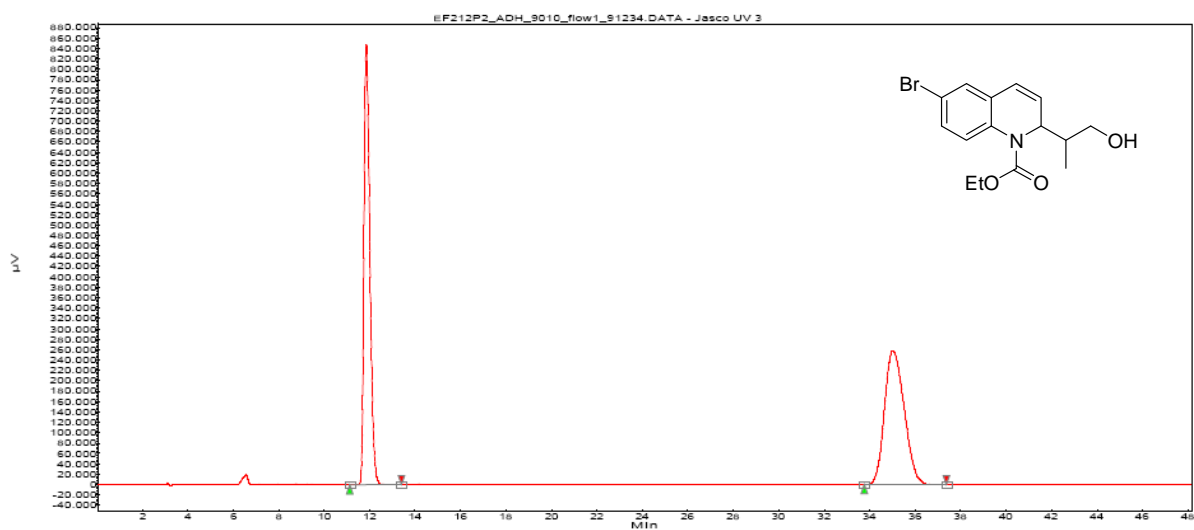

| Index | Name    | Start Time [Min] | End Time [Min] | Ret. time Offset [Min] | Quantity [% Area] | Height [µV] | Area [µV.Min] | Area % [%] |        |
|-------|---------|------------------|----------------|------------------------|-------------------|-------------|---------------|------------|--------|
| 1     | UNKNOWN | 11,135           | 11,858         | 13,403                 | 0,000             | 49,42       | 848302,9      | 252650,9   | 49,421 |
| 2     | UNKNOWN | 33,765           | 35,017         | 37,373                 | 0,000             | 50,58       | 257600,7      | 258573,8   | 50,579 |
| Total |         |                  |                |                        | 100,00            | 1105903,6   | 511224,8      | 100,000    |        |

### Chromatogram : CV947-p2\_ADH\_9010\_flow1\_222

Data file: CV947-p2\_ADH\_9010\_flow1\_222.DATA  
 Method: HPLC1\_ADH\_9010\_flow1\_acq\_60  
 Date: 10.02.2012 22:09:43

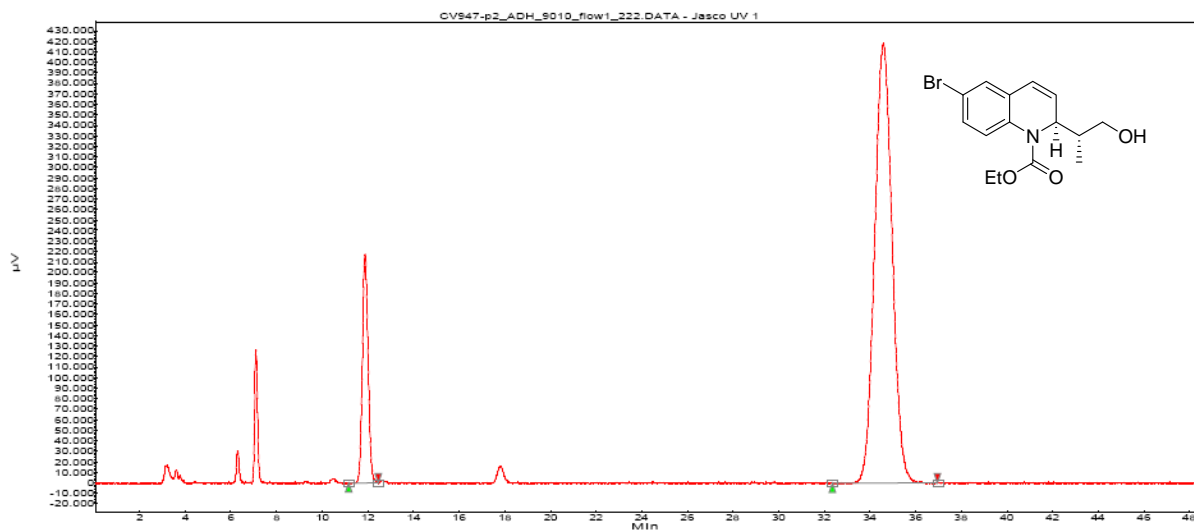

| Index | Start Time [Min] | End Time [Min] | Area % [%] |
|-------|------------------|----------------|------------|
| 1     | 11,157           | 11,883         | 14,599     |
| 2     | 32,355           | 34,592         | 85,401     |
| Total |                  |                | 100,000    |



### Chromatogram : EF195-P1\_ADH\_9010\_flow1\_666

Data file: EF195-P1\_ADH\_9010\_flow1\_666.DATA  
Method: HPLC1\_ADH\_9010\_flow1\_acq\_60  
Date: 27.02.2012 22:14:06

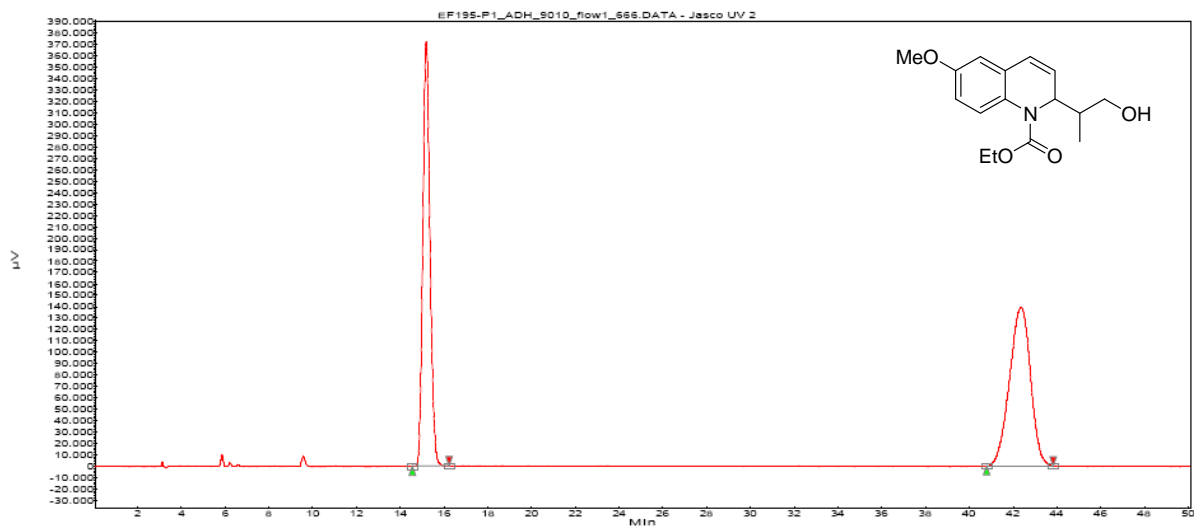

| Index | Start Time [Min] | Time [Min] | End [Min] | Area %  |
|-------|------------------|------------|-----------|---------|
| 1     | 14,566           | 15,192     | 16,240    | 47,612  |
| 2     | 40,785           | 42,367     | 43,822    | 52,388  |
| Total |                  |            |           | 100,000 |

### Chromatogram : CV953-p2\_ADH\_9010\_flow1\_222

Data file: CV953-p2\_ADH\_9010\_flow1\_222.DATA  
Method: HPLC1\_ADH\_9010\_flow1\_acq\_60  
Date: 28.02.2012 17:01:07

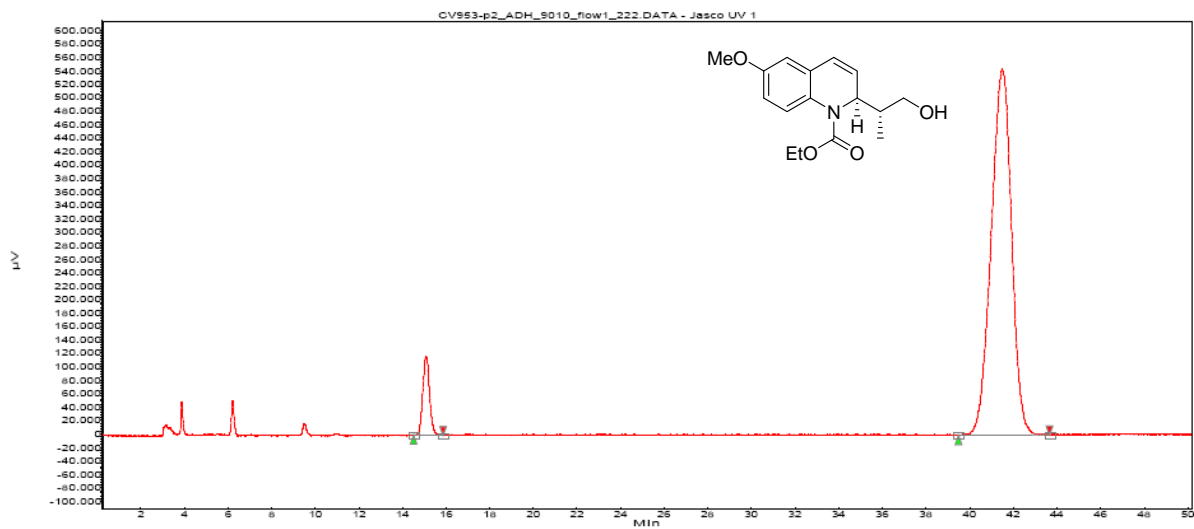

| Index | Start Time [Min] | Time [Min] | End [Min] | Area %  |
|-------|------------------|------------|-----------|---------|
| 2     | 14,504           | 15,083     | 15,868    | 6,618   |
| 1     | 39,483           | 41,483     | 43,636    | 93,382  |
| Total |                  |            |           | 100,000 |

### Chromatogram : EF207P2\_ADH\_9010\_flow1\_8

Data file: EF207P2\_ADH\_9010\_flow1\_8.DATA  
 Method: HPLC1\_ADH\_9010\_flow1\_acq\_60  
 Date: 11.02.2012 02:20:42

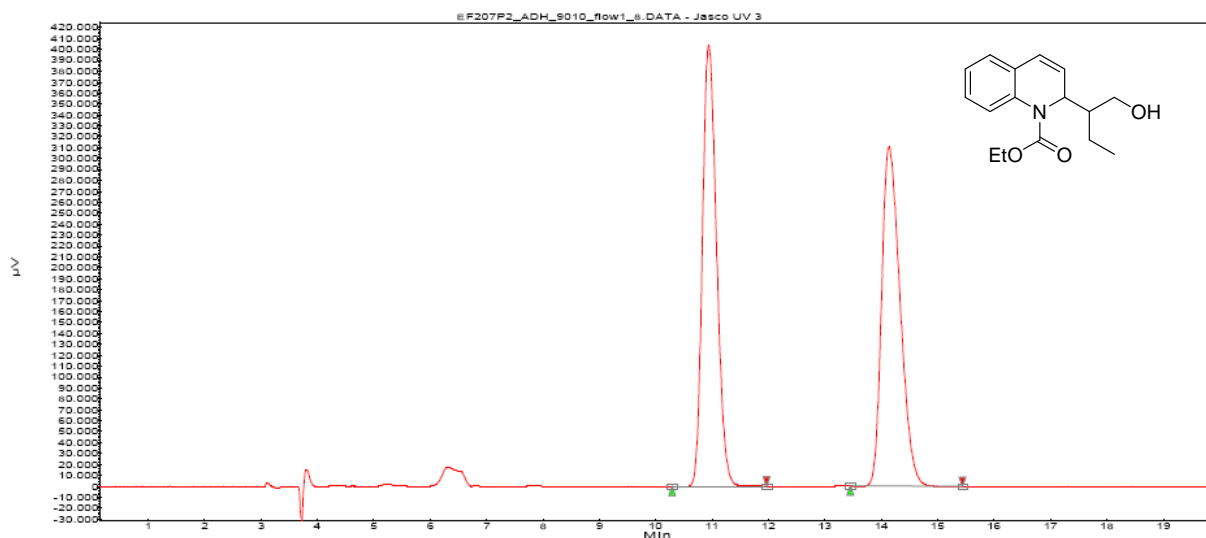

| Index | Name    | Start [Min] | Time [Min] | End [Min] | Ret. time Offset [Min] | Quantity [% Area] | Height [µV] | Area [µV.Min] | Area % [%] |
|-------|---------|-------------|------------|-----------|------------------------|-------------------|-------------|---------------|------------|
| 1     | UNKNOWN | 10,289      | 10,933     | 11,963    | 0,000                  | 49,86             | 404241,3    | 116907,1      | 49,857     |
| 2     | UNKNOWN | 13,450      | 14,133     | 15,434    | 0,000                  | 50,14             | 310458,6    | 117579,9      | 50,143     |
| Total |         |             |            |           |                        | 100,00            | 714699,9    | 234487,0      | 100,000    |

### Chromatogram : CV956-p2\_ADH\_9010\_flow1\_444

Data file: CV956-p2\_ADH\_9010\_flow1\_444.DATA  
 Method: HPLC1\_ADH\_9010\_flow1\_acq\_40  
 Date: 28.02.2012 18:44:38

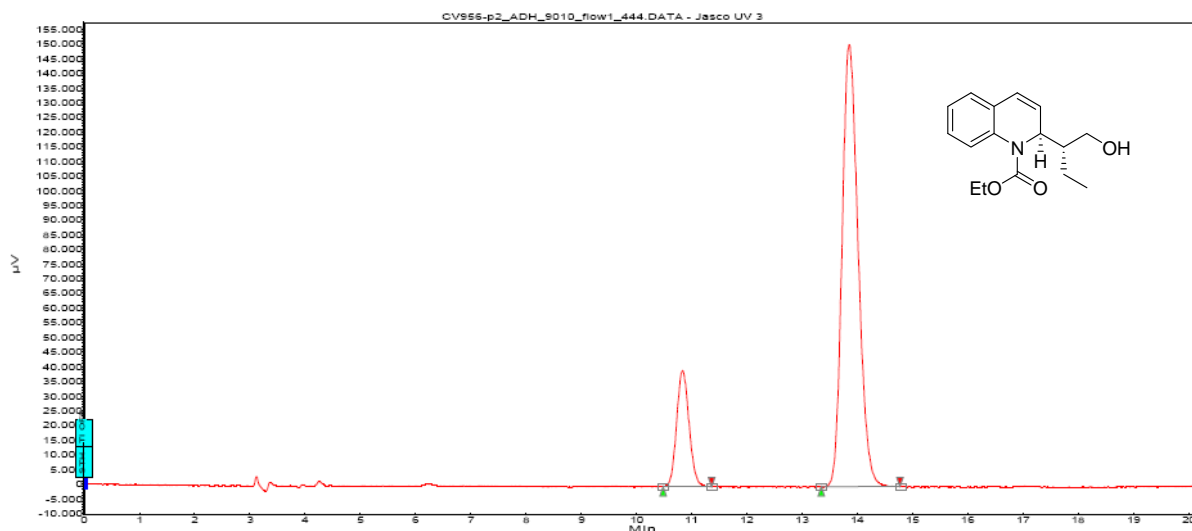

| Index | Start [Min] | Time [Min] | End [Min] | Area % [%] |
|-------|-------------|------------|-----------|------------|
| 1     | 10,484      | 10,833     | 11,361    | 16,873     |
| 2     | 13,346      | 13,850     | 14,766    | 83,127     |
| Total |             |            |           | 100,000    |

### Chromatogram : EF208P2\_ADH\_9010\_flow1\_3

Data file: EF208P2\_ADH\_9010\_flow1\_3.DATA  
 Method: HPLC1\_ADH\_9010\_flow1\_acq\_60  
 Date: 10.02.2012 20:11:39

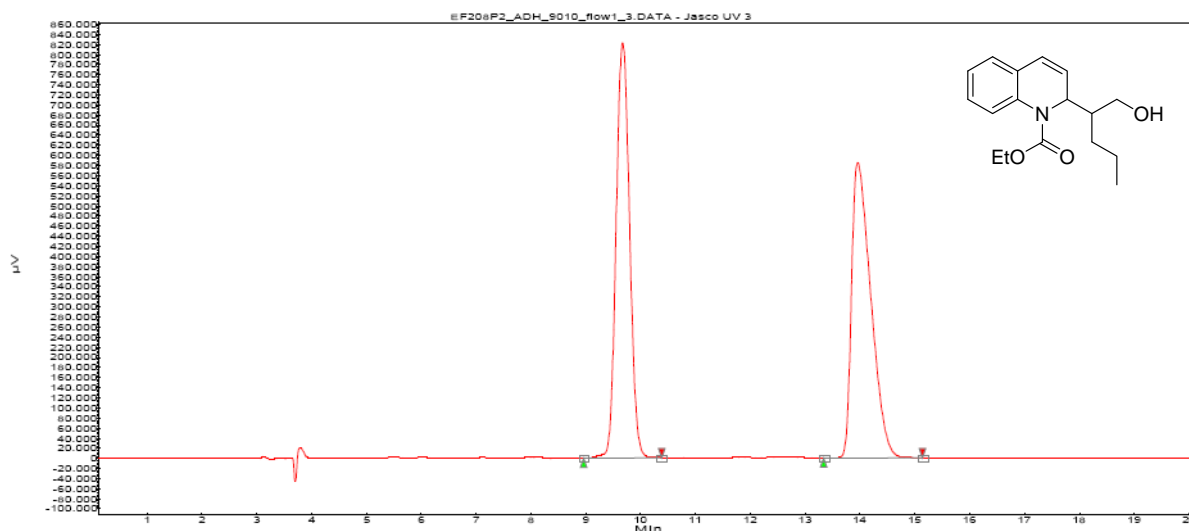

| Index | Name    | Start Time [Min] | End Time [Min] | Ret. time [Min] | Offset [Min] | Quantity [% Area] | Height [μV] | Area [μV.Min] | Area % [%] |
|-------|---------|------------------|----------------|-----------------|--------------|-------------------|-------------|---------------|------------|
| 1     | UNKNOWN | 8,962            | 9,675          | 10,383          | 0,000        | 49,71             | 822659,7    | 235067,1      | 49,711     |
| 2     | UNKNOWN | 13,334           | 13,958         | 15,138          | 0,000        | 50,29             | 585982,9    | 237797,5      | 50,289     |
| Total |         |                  |                |                 |              | 100,00            | 1408642,6   | 472864,6      | 100,000    |

### Chromatogram : CV958-p2\_ADH\_9010\_flow1\_61

Data file: CV958-p2\_ADH\_9010\_flow1\_61.DATA  
 Method: HPLC1\_ADH\_9010\_flow1\_acq\_40  
 Date: 27.02.2012 13:01:00

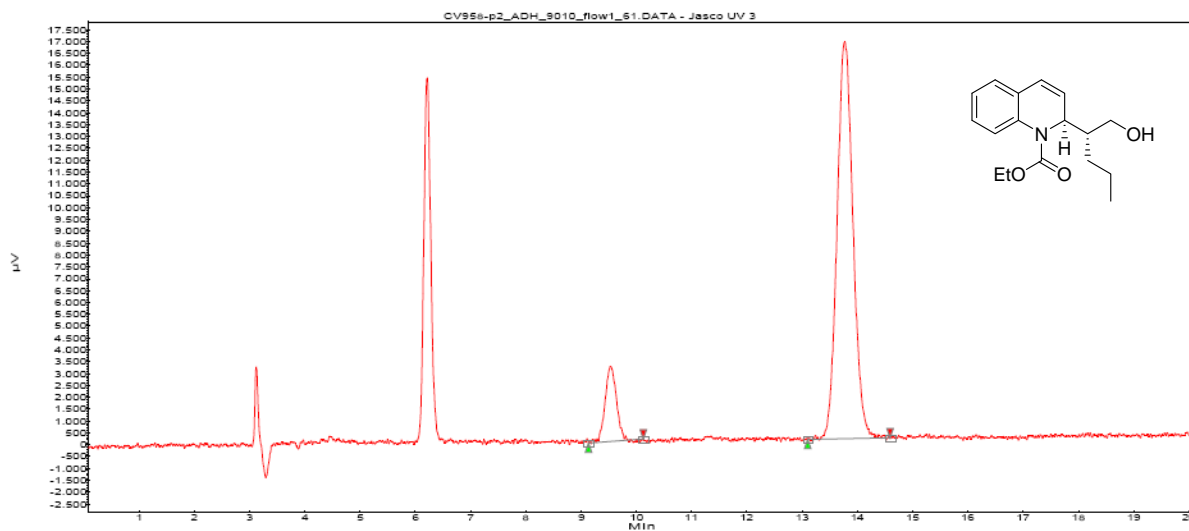

| Index | Start Time [Min] | End Time [Min] | Area % [%] |
|-------|------------------|----------------|------------|
| 1     | 9,132            | 9,533          | 11,735     |
| 2     | 13,099           | 13,767         | 88,265     |
| Total |                  |                | 100,000    |

### Chromatogram : CV986-p2\_ADH\_9010\_flow1\_81

Data file: CV986-p2\_ADH\_9010\_flow1\_81.DATA  
Method: HPLC1\_ADH\_9010\_flow1\_acq\_30  
Date: 20.05.2012 21:17:52

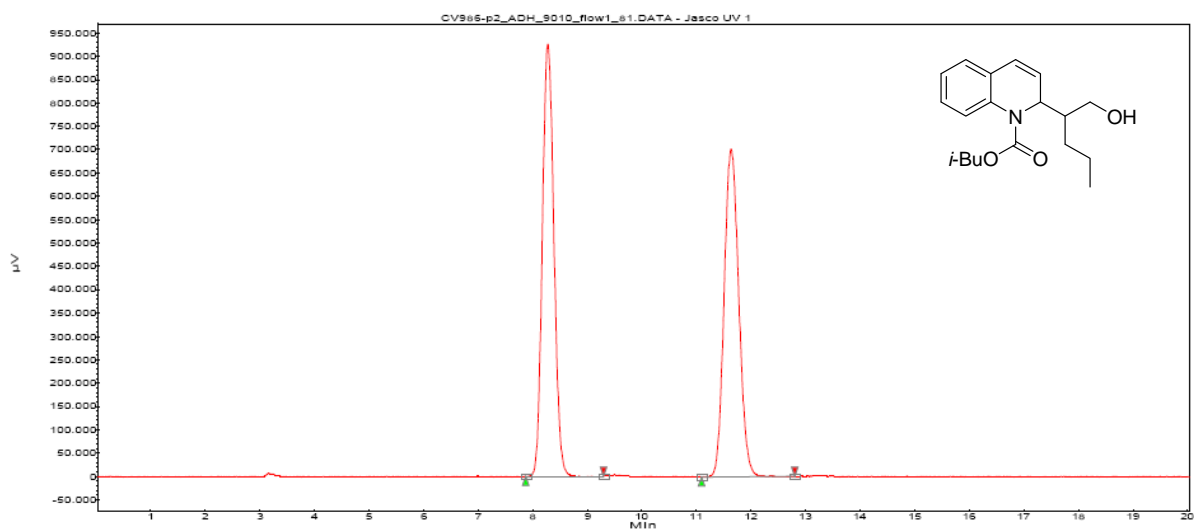

| Index | Start Time [Min] | End Time [Min] | Area %  |
|-------|------------------|----------------|---------|
| 1     | 7.872            | 8.275          | 51.083  |
| 2     | 11.095           | 12.800         | 48.917  |
| Total |                  |                | 100.000 |

### Chromatogram : CV1020-f5\_ADH\_9010\_flow1\_3

Data file: CV1020-f5\_ADH\_9010\_flow1\_3.DATA  
Method: HPLC1\_ADH\_9010\_flow1\_acq\_40  
Date: 01.06.2012 16:39:12

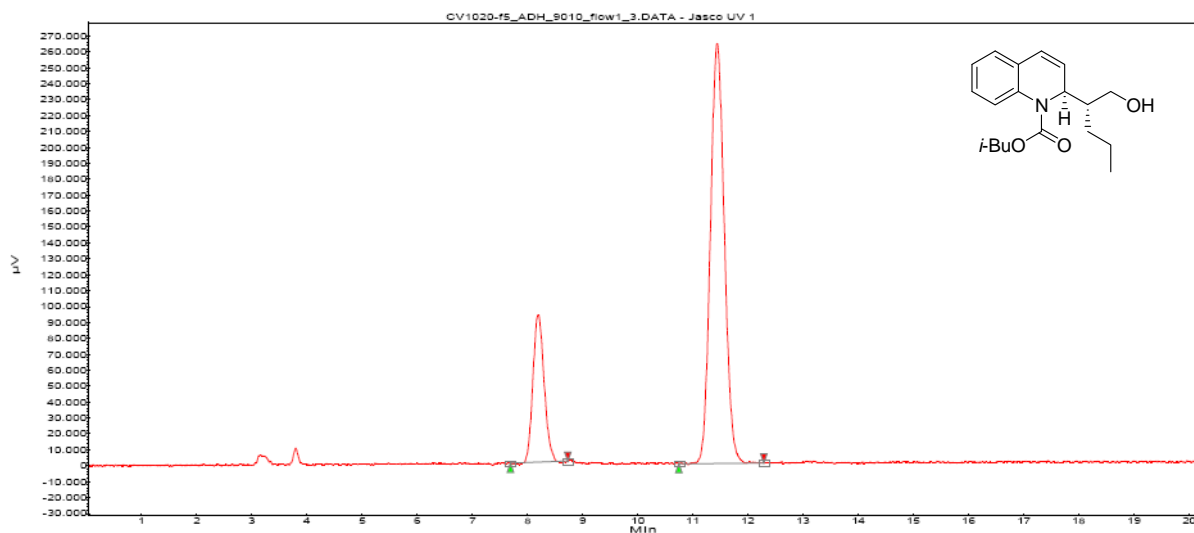

| Index | Start Time [Min] | End Time [Min] | Area %  |
|-------|------------------|----------------|---------|
| 1     | 7.692            | 8.731          | 21.863  |
| 2     | 10.748           | 12.286         | 78.137  |
| Total |                  |                | 100.000 |

### Chromatogram : EF209P2\_ADH\_9010\_flow1\_5

Data file: EF209P2\_ADH\_9010\_flow1\_5.DATA  
 Method: HPLC1\_ADH\_9010\_flow1\_acq\_60  
 Date: 11.02.2012 00:15:15

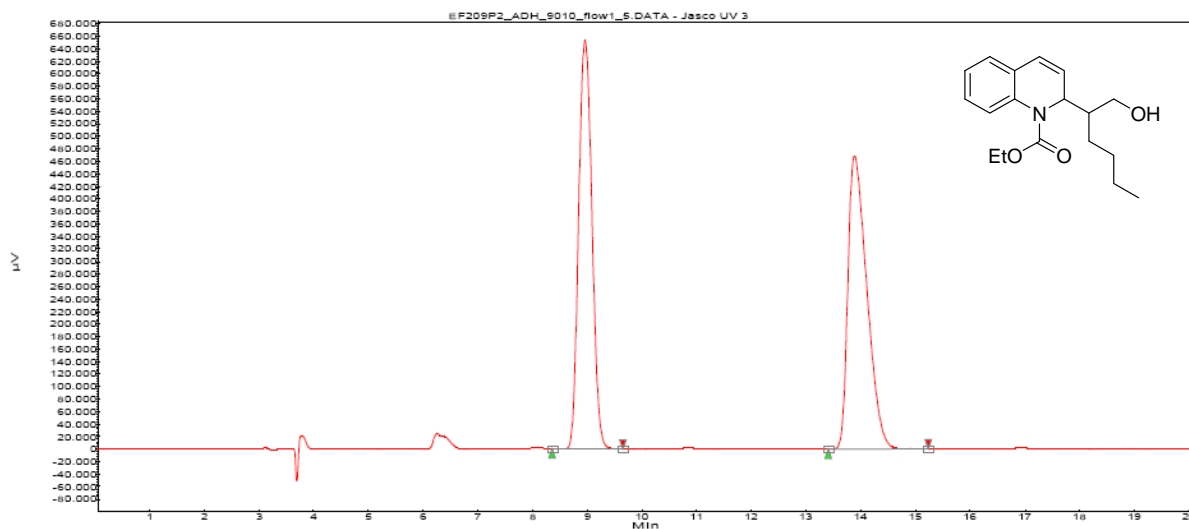

| Index | Name    | Start [Min] | Time [Min] | End [Min] | Ret. time Offset [Min] | Quantity [% Area] | Height [μV] | Area [μV.Min] | Area % [%] |
|-------|---------|-------------|------------|-----------|------------------------|-------------------|-------------|---------------|------------|
| 1     | UNKNOWN | 8,356       | 8,967      | 9,655     | 0,000                  | 49,44             | 653113,5    | 183988,9      | 49,444     |
| 2     | UNKNOWN | 13,406      | 13,883     | 15,235    | 0,000                  | 50,56             | 468755,7    | 188129,6      | 50,556     |
| Total |         |             |            |           |                        | 100,00            | 1121869,2   | 372118,5      | 100,000    |

### Chromatogram : CV959-p2\_ADH\_9010\_flow1\_888

Data file: CV959-p2\_ADH\_9010\_flow1\_888.DATA  
 Method: HPLC1\_ADH\_9010\_flow1\_acq\_40  
 Date: 27.02.2012 20:36:27

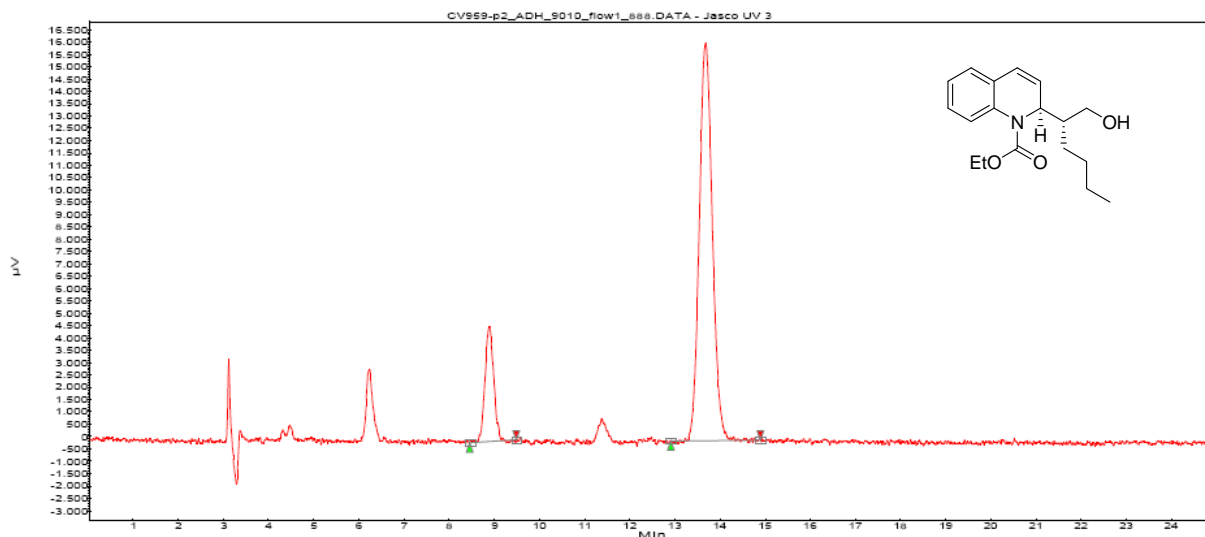

| Index | Start [Min] | Time [Min] | End [Min] | Area % [%] |
|-------|-------------|------------|-----------|------------|
| 1     | 8,457       | 8,883      | 9,487     | 16,134     |
| 2     | 12,913      | 13,683     | 14,896    | 83,866     |
| Total |             |            |           | 100,000    |

### Chromatogram : EF215-4\_ADH\_9010\_flow1\_2

Data file: EF215-4\_ADH\_9010\_flow1\_2.DATA  
 Method: HPLC1\_ADH\_9010\_flow1\_acq\_40  
 Date: 23.03.2012 17:12:15

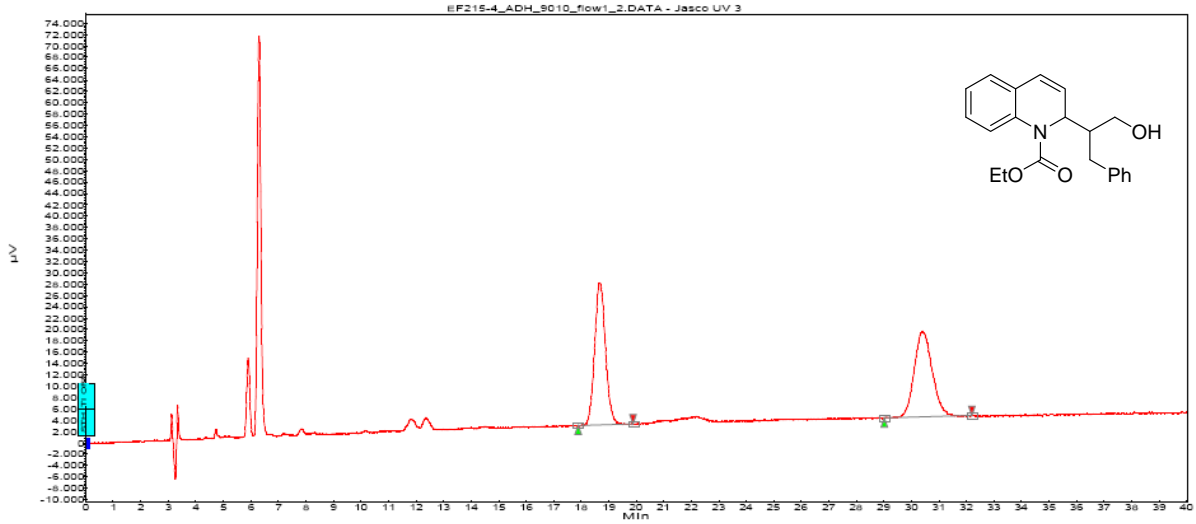

| Index | Start [Min] | Time [Min] | End [Min] | Area %  |
|-------|-------------|------------|-----------|---------|
| 1     | 17,893      | 18,675     | 19,876    | 50,229  |
| 2     | 29,008      | 30,408     | 32,190    | 49,771  |
| Total |             |            |           | 100,000 |

### Chromatogram : CV960-f2\_ADH\_9010\_flow1\_772

Data file: CV960-f2\_ADH\_9010\_flow1\_772.DATA  
 Method: HPLC1\_ADH\_9010\_flow1\_acq\_60  
 Date: 28.02.2012 01:22:18

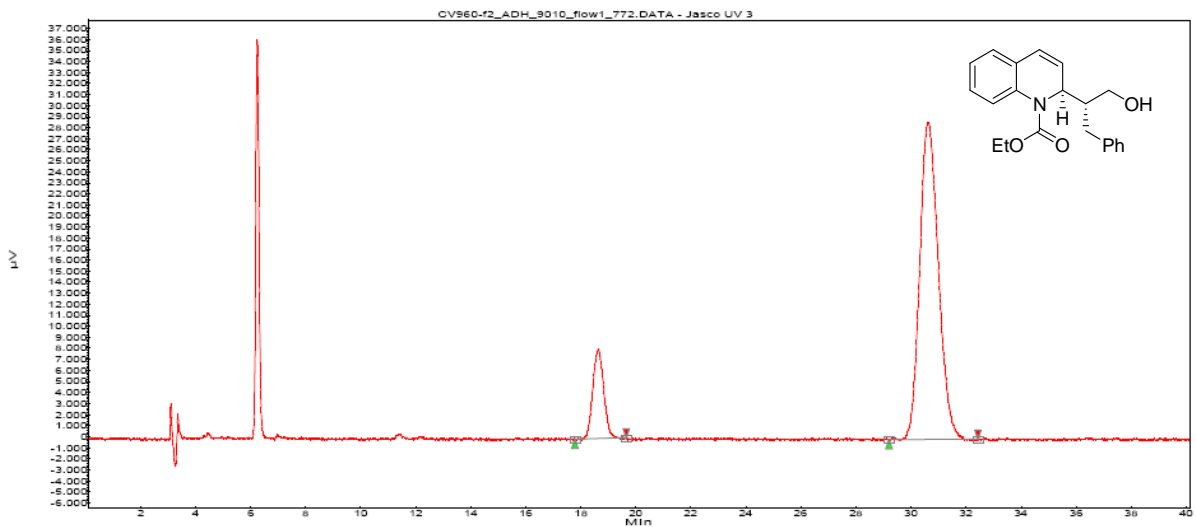

| Index | Name    | Start [Min] | Time [Min] | End [Min] | Ret. time Offset [Min] | Quantity [% Area] | Height [µV] | Area [µV.Min] | Area %  |
|-------|---------|-------------|------------|-----------|------------------------|-------------------|-------------|---------------|---------|
| 1     | UNKNOWN | 17,789      | 18,633     | 19,649    | 0,000                  | 14,12             | 8132,2      | 3696,7        | 14,122  |
| 2     | UNKNOWN | 29,194      | 30,625     | 32,417    | 0,000                  | 85,88             | 28675,1     | 22480,7       | 85,878  |
| Total |         |             |            |           |                        | 100,00            | 36807,3     | 26177,4       | 100,000 |

### Chromatogram : EF231-6\_ADH\_9010\_flow1\_5

Data file: EF231-6\_ADH\_9010\_flow1\_5.DATA  
Method: HPLC1\_ADH\_9010\_flow1\_acq\_40  
Date: 07.03.2012 00:36:37

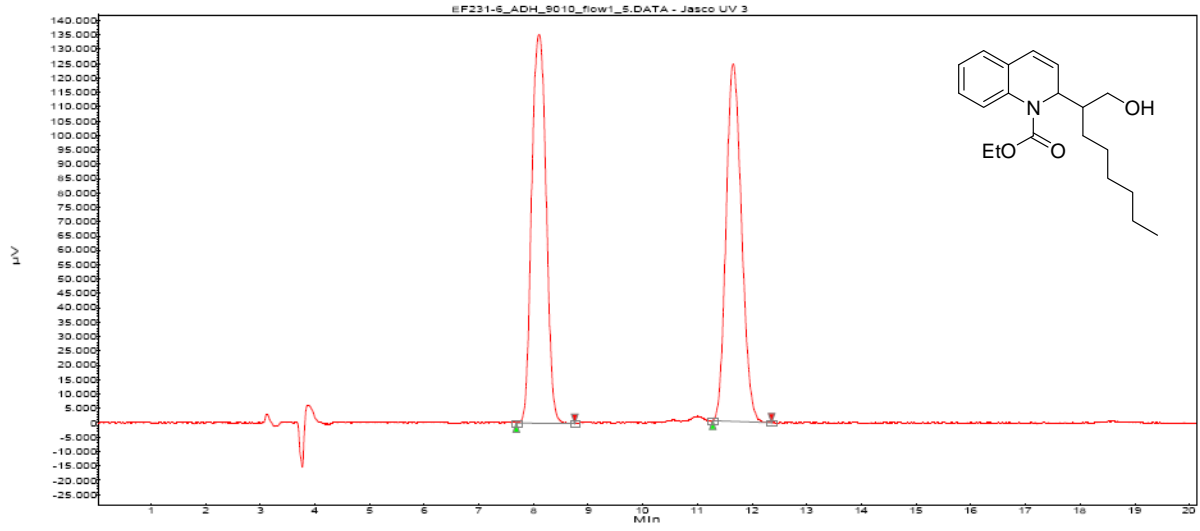

| Index | Start Time [Min] | Time [Min] | End [Min] | Area %  |
|-------|------------------|------------|-----------|---------|
| 1     | 7,686            | 8,108      | 8,760     | 50,312  |
| 2     | 11,281           | 11,658     | 12,355    | 49,688  |
| Total |                  |            |           | 100,000 |

### Chromatogram : CV961-4\_ADH\_9010\_flow1\_3

Data file: CV961-4\_ADH\_9010\_flow1\_3.DATA  
Method: HPLC1\_ADH\_9010\_flow1\_acq\_40  
Date: 14.03.2012 11:39:20

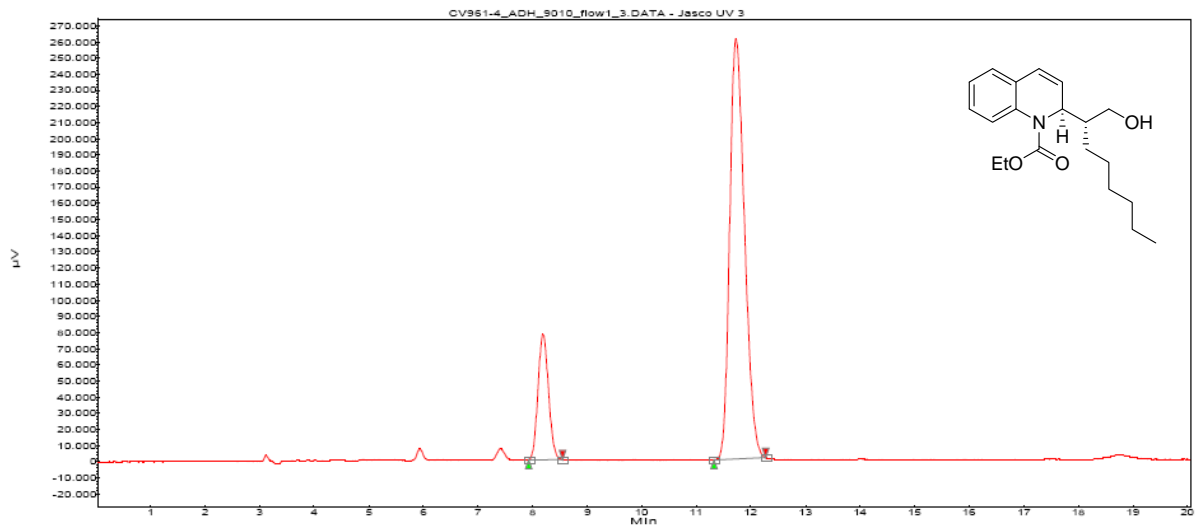

| Index | Start Time [Min] | Time [Min] | End [Min] | Area %  |
|-------|------------------|------------|-----------|---------|
| 1     | 7,934            | 8,192      | 8,554     | 17,505  |
| 2     | 11,322           | 11,725     | 12,273    | 82,495  |
| Total |                  |            |           | 100,000 |

### Chromatogram : CV987-p2\_ADH\_9010\_flow1\_101

Data file: CV987-p2\_ADH\_9010\_flow1\_101.DATA  
Method: HPLC1\_ADH\_9010\_flow1\_acq\_30  
Date: 20.05.2012 22:23:18

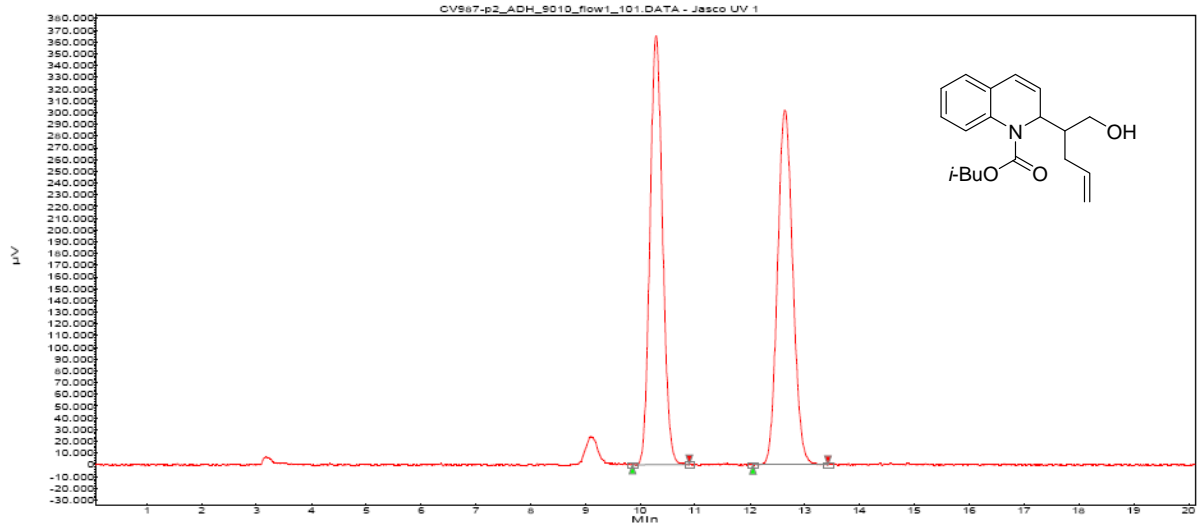

| Index | Start Time [Min] | End Time [Min] | Area %  |
|-------|------------------|----------------|---------|
| 1     | 9,860            | 10,283         | 49,854  |
| 2     | 12,056           | 13,423         | 50,146  |
| Total |                  |                | 100,000 |

### Chromatogram : CV1021-f5\_ADH\_9010\_flow1\_31

Data file: CV1021-f5\_ADH\_9010\_flow1\_31.DATA  
Method: HPLC1\_ADH\_9010\_flow1\_acq\_40  
Date: 01.06.2012 23:22:43

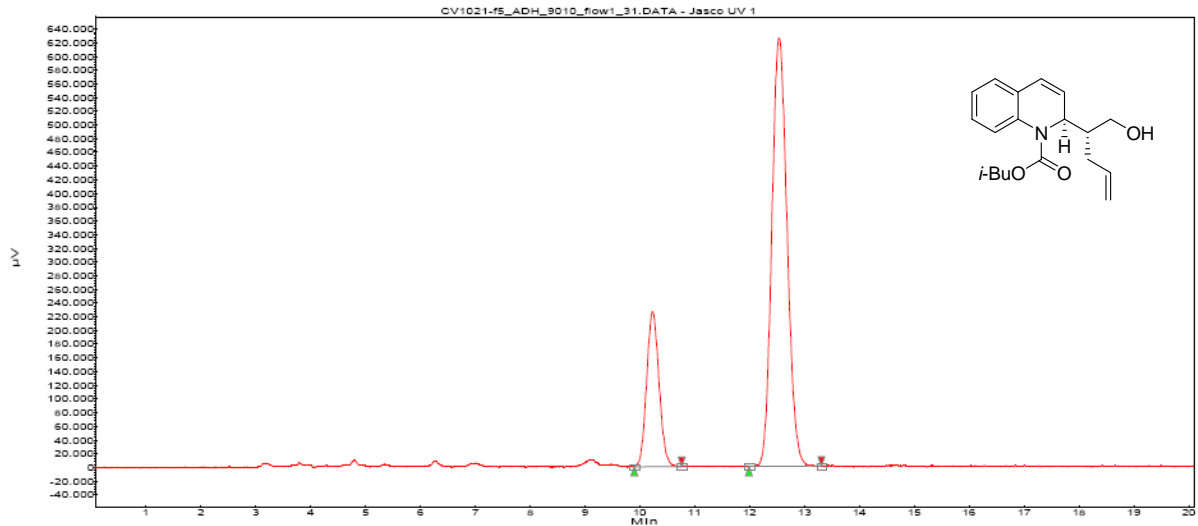

| Index | Start Time [Min] | End Time [Min] | Area %  |
|-------|------------------|----------------|---------|
| 1     | 9,897            | 10,233         | 22,641  |
| 2     | 11,983           | 13,306         | 77,359  |
| Total |                  |                | 100,000 |
